# Supplementary material for: Insight into the formation of trumpet and needle-type leaf in Ginkgo biloba L. mutant
Source: Front Plant Sci. 2022 Dec 9;13:1081280. doi: 10.3389/fpls.2022.1081280 (PMC9780455; doi:10.3389/fpls.2022.1081280)
Supplement: Supplementary file 2 [file DataSheet_2.xlsx]

## Sheet: Table S1.
Table S1. The primers used for quantitative real-time PCR.
Gene name	Symbol	Forward primer	Rervese primer
Gb_12479	AS2	TCTTCGAATCTCGGCATCGG	CCGGGAAGAAATCTGCGAG
Gb_02083	HB-1	GGTACCCCAGAAGCACTCAC	CTGGCTTCACAATCACCCC
Gb_22423	YAB2	CGGTGAGCGTTCCATACAG	CTGGTGTGGGAGTGCTTG
Gb_36880	YAB5	AACAGTGGTTAGAGGGTGCG	GGCAGTGTCCGGAAATCAGA
Gb_23328	ARF2	GCATCGACAAATCAGGGTGC	CATCTGTGTCCGGTTCAGC
Gb_23186	ARF3	ACCTGAGCCTCTGCCATTC	CATCCCCCGCTACTAATC
Gb_18932	CUC1-1	CTTTGTTGCAGTTCAGGAG	GGCTACTGGTTGGTTGGTAC
Gb_13930	CUC1-2	CAGAAAAGGCGAAAATGGG	GTCCTTTCCGGTAGCTTTCCA
Gb_01375	CUC2-2	CAGGGTTCAGGTTTCATCCCA	CCACCTCACCAATTGCTCTC
Gb_26984	CUC3-5	CCACAGCCTAGCAACTCC	CCAGCACAGTCTCCATTGAC
Gb_35390	TCP15	GAAGGTGCTGTAGTAGTTGGC	AATCCCTGCCTTCACCATGTC
Gb_37654	TCP8	GCTACTATTCTCACACGGGC	TGCCATGTTAATACCACGCC
Gb_36590	PP2A	CGAGAGGGTACAGACACACC	CGTCCACGACGCTCTTTCC

## Sheet: Table S2.
Table S2 . The alignment results of ANL and NL samples with G. biloba genome
BMK-ID	Total Reads	Mapped Reads	Uniq Mapped Reads	Multiple Map Reads	Reads Map to '+'	Reads Map to '-'
ANL1	65905424	61,564,124 (93.41%)	56,982,234 (86.46%)	4,581,890 (6.95%)	29,911,002 (45.38%)	30,337,990 (46.03%)
ANL2	87418414	82,240,907 (94.08%)	77,412,281 (88.55%)	4,828,626 (5.52%)	40,270,981 (46.07%)	40,681,245 (46.54%)
ANL3	98233334	92,596,828 (94.26%)	87,953,207 (89.53%)	4,643,621 (4.73%)	45,555,579 (46.37%)	45,897,097 (46.72%)
NL1	136008800	127,515,840 (93.76%)	119,240,751 (87.67%)	8,275,089 (6.08%)	62,338,211 (45.83%)	63,027,020 (46.34%)
NL2	72083256	67,829,400 (94.10%)	64,462,840 (89.43%)	3,366,560 (4.67%)	33,381,093 (46.31%)	33,637,080 (46.66%)
NL3	65922944	62,141,422 (94.26%)	59,480,999 (90.23%)	2,660,423 (4.04%)	30,715,882 (46.59%)	30,876,123 (46.84%)

## Sheet: Table S3.
Table S3. All the identified differently expressed genes (DEGs) between NL and ANL libraries.
#ID	ANL1_FPKM	ANL1_count	ANL2_FPKM	ANL2_count	ANL3_FPKM	ANL3_count	NL1_FPKM	NL1_count	NL2_FPKM	NL2_count	NL3_FPKM	NL3_count	FDR	log2FC	regulated	COG_class	COG_class_annotation	GO_annotation	KEGG_annotation	KEGG_pathway_annotation	KOG_class	KOG_class_annotation	Pfam_annotation	Swiss_Prot_annotation	eggNOG_class	eggNOG_class_annotation	NR_annotation
Gb_05078	0	0	0	0	0	0	22.2209	1790	24.0363	1034	25.5328	1010	2.32835e-121	#NAME?	down	--	--	Cellular Component: extracellular region (GO:0005576);; Molecular Function: manganese ion binding (GO:0030145);; Molecular Function: nutrient reservoir activity (GO:0045735);;	--	--	--	--	Cupin;; Cupin domain	Germin-like protein subfamily 2 member 1 (Precursor) GN=F14J9.22 OS=Arabidopsis thaliana (Mouse-ear cress) PE=2 SV=2	R	General function prediction only	hypothetical protein AMTR_s00089p00119070 [Amborella trichopoda]
Gb_15357	0	0	0	0	0	0	0.609884	250	0.854781	187	0.819166	165	9.06488e-32	#NAME?	down	--	--	--	--	--	--	--	--	--	S	Function unknown	hypothetical protein AMTR_s00013p00252180 [Amborella trichopoda]
Gb_18427	0	0	0	0	0	0	1.51541	118	3.59314	150	1.65358	64	7.3846e-09	#NAME?	down	[GR]	Carbohydrate transport and metabolism;; General function prediction only	Molecular Function: oxidoreductase activity (GO:0016491);; Molecular Function: metal ion binding (GO:0046872);;	--	--	--	--	Cupin;; Cupin domain	Putative germin-like protein 3-2 (Precursor) OS=Oryza sativa subsp. japonica (Rice) PE=3 SV=1	R	General function prediction only	PREDICTED: germin-like protein subfamily 2 member 1 [Tarenaya hassleriana]
Gb_19313	0	0	0	0	0	0	0.908542	93	1.80722	99	1.55424	78	2.08081e-17	#NAME?	down	[IQR]	Lipid transport and metabolism;; Secondary metabolites biosynthesis, transport and catabolism;; General function prediction only	Molecular Function: oxidoreductase activity (GO:0016491);; Biological Process: oxidation-reduction process (GO:0055114);;	--	--	[R]	General function prediction only	short chain dehydrogenase;; Enoyl-(Acyl carrier protein) reductase;; KR domain;; 3-beta hydroxysteroid dehydrogenase/isomerase family	Short-chain dehydrogenase reductase 2a GN=T18N14.60 OS=Arabidopsis thaliana (Mouse-ear cress) PE=3 SV=1	Q	Secondary metabolites biosynthesis, transport and catabolism	unknown [Picea sitchensis]
Gb_24534	0	0	0	0	0	0	0.661999	122	0.544376	54	0.715228	65	7.90827e-18	#NAME?	down	[Q]	Secondary metabolites biosynthesis, transport and catabolism	Molecular Function: binding (GO:0005488);; Molecular Function: oxidoreductase activity (GO:0016491);;	K20562|0|cmo:103485013|K20562 biphenyl-4-hydroxylase | (RefSeq) cytochrome P450 CYP736A12-like	--	[Q]	Secondary metabolites biosynthesis, transport and catabolism	Cytochrome P450	Cytochrome P450 750A1 GN=CYP750A1 OS=Pinus taeda (Loblolly pine) PE=2 SV=1	Q	Secondary metabolites biosynthesis, transport and catabolism	hypothetical protein PRUPE_ppa026652mg [Prunus persica]
Gb_28451	0	0	0	0	0	0	3.55431	110	5.45478	90	7.3039	111	5.53971e-17	#NAME?	down	--	--	--	--	--	--	--	--	--	--	--	--
Gb_29011	0	0	0	0	0	0	2.81889	228	7.78274	335	9.22081	365	1.31773e-11	#NAME?	down	--	--	--	--	--	--	--	--	--	--	--	--
Gb_38850	0	0	0	0	0	0	3.12413	252	6.43977	350	6.50427	297	8.11314e-15	#NAME?	down	--	--	--	--	--	--	--	PAR1 protein	--	R	General function prediction only	unknown [Picea sitchensis]
NG_17390	0	0	0	0	0	0	1.41629	360	3.3919	458	2.86908	352	2.71406e-18	#NAME?	down	[DPM]	Cell cycle control, cell division, chromosome partitioning;; Inorganic ion transport and metabolism;; Cell wall/membrane/envelope biogenesis	Molecular Function: copper ion binding (GO:0005507);; Cellular Component: membrane (GO:0016020);; Molecular Function: oxidoreductase activity, oxidizing metal ions (GO:0016722);; Biological Process: lignin catabolic process (GO:0046274);; Cellular Component: apoplast (GO:0048046);; Molecular Function: hydroquinone:oxygen oxidoreductase activity (GO:0052716);; Biological Process: oxidation-reducti…	K05909|0|atr:18423467|K05909 laccase [EC:1.10.3.2] | (RefSeq) laccase-12	--	[Q]	Secondary metabolites biosynthesis, transport and catabolism	Multicopper oxidase;; Multicopper oxidase;; Multicopper oxidase	Laccase-12 OS=Arabidopsis thaliana OX=3702 GN=LAC12 PE=2 SV=1	S	Function unknown	laccase [Picea abies]
NG_20409	0	0	0	0	0	0	4.87875	692	2.56321	196	1.57483	111	1.1443e-08	#NAME?	down	--	--	--	--	--	--	--	--	--	S	Function unknown	hypothetical protein AQUCO_00700046v1, partial [Aquilegia coerulea]
NG_20930	0	0	0	0	0	0	1.67275	313	1.60574	182	2.10273	224	1.08635e-35	#NAME?	down	--	--	Biological Process: metabolic process (GO:0008152);; Molecular Function: carbon-oxygen lyase activity, acting on phosphates (GO:0016838);; Molecular Function: metal ion binding (GO:0046872);;	K16086|9.42949e-101|smo:SELMODRAFT_120716|K16086 (13E)-labda-7,13-dien-15-ol synthase [EC:3.1.7.10] | (RefSeq) hypothetical protein	Diterpenoid biosynthesis (ko00904)	--	--	Terpene synthase family, metal binding domain;; Terpene synthase, N-terminal domain	Taxadiene synthase OS=Taxus brevifolia OX=46220 GN=TDC1 PE=1 SV=1	--	--	(E,E) farnesol synthase [Ginkgo biloba]
NG_22334	0	0	0	0	0	0	3.44449	229	3.98927	142	1.6569	55	4.76354e-13	#NAME?	down	--	--	--	--	--	--	--	--	--	--	--	--
NG_6825	0	0	0	0	0	0	260.709	22194	342.575	15563	386.984	16180	9.94965e-146	#NAME?	down	--	--	--	--	--	--	--	--	--	--	--	--
NG_8568	0	0	0	0	0	0	0.650299	174	1.01205	145	0.702912	93	7.76065e-25	#NAME?	down	[DPM]	Cell cycle control, cell division, chromosome partitioning;; Inorganic ion transport and metabolism;; Cell wall/membrane/envelope biogenesis	Molecular Function: copper ion binding (GO:0005507);; Cellular Component: integral component of membrane (GO:0016021);; Molecular Function: oxidoreductase activity, oxidizing metal ions (GO:0016722);; Biological Process: lignin catabolic process (GO:0046274);; Cellular Component: apoplast (GO:0048046);; Molecular Function: hydroquinone:oxygen oxidoreductase activity (GO:0052716);; Biological Proc…	K05909|0|atr:18423467|K05909 laccase [EC:1.10.3.2] | (RefSeq) laccase-12	--	[Q]	Secondary metabolites biosynthesis, transport and catabolism	Multicopper oxidase;; Multicopper oxidase;; Multicopper oxidase	Laccase-12 OS=Arabidopsis thaliana OX=3702 GN=LAC12 PE=2 SV=1	Q	Secondary metabolites biosynthesis, transport and catabolism	laccase [Picea abies]
NG_8570	0	0	0	0	0	0	0.583427	142	0.966738	138	1.11926	111	9.88105e-24	#NAME?	down	[DPM]	Cell cycle control, cell division, chromosome partitioning;; Inorganic ion transport and metabolism;; Cell wall/membrane/envelope biogenesis	Molecular Function: copper ion binding (GO:0005507);; Cellular Component: integral component of membrane (GO:0016021);; Molecular Function: oxidoreductase activity, oxidizing metal ions (GO:0016722);; Biological Process: lignin catabolic process (GO:0046274);; Cellular Component: apoplast (GO:0048046);; Molecular Function: hydroquinone:oxygen oxidoreductase activity (GO:0052716);; Biological Proc…	K05909|0|atr:18423467|K05909 laccase [EC:1.10.3.2] | (RefSeq) laccase-12	--	[Q]	Secondary metabolites biosynthesis, transport and catabolism	Multicopper oxidase;; Multicopper oxidase;; Multicopper oxidase	Laccase-12 OS=Arabidopsis thaliana OX=3702 GN=LAC12 PE=2 SV=1	Q	Secondary metabolites biosynthesis, transport and catabolism	laccase [Picea abies]
Gb_11025	0.790932	138	0.916697	213	0.492443	130	0	0	0	0	0	0	3.52417e-20	Inf	up	--	--	--	--	--	[R]	General function prediction only	PPR repeat family;; PPR repeat;; Pentatricopeptide repeat domain;; PPR repeat;; DYW family of nucleic acid deaminases	Pentatricopeptide repeat-containing protein At4g33170 GN=PCMP-H53 OS=Arabidopsis thaliana (Mouse-ear cress) PE=3 SV=1	R	General function prediction only	PREDICTED: pentatricopeptide repeat-containing protein At5g04780-like isoform X1 [Nelumbo nucifera]
Gb_12167	2.84392	76	2.22744	80	3.19226	129	0	0	0	0	0	0	6.22624e-20	Inf	up	--	--	--	K14488|1.28922e-29|aly:ARALYDRAFT_491179|K14488 SAUR family protein | (RefSeq) auxin-responsive family protein	Plant hormone signal transduction (ko04075)	--	--	Auxin responsive protein	Indole-3-acetic acid-induced protein ARG7 GN=ARG7 OS=Vigna radiata var. radiata (Mung bean) PE=2 SV=1	R	General function prediction only	unknown [Picea sitchensis]
Gb_13947	1.75321	178	1.46488	199	1.58451	243	0	0	0	0	0	0	2.12838e-32	Inf	up	--	--	Molecular Function: oxidoreductase activity, acting on the CH-NH group of donors, oxygen as acceptor (GO:0016647);; Biological Process: oxidation-reduction process (GO:0055114);;	--	--	[Q]	Secondary metabolites biosynthesis, transport and catabolism	Flavin containing amine oxidoreductase;; NAD(P)-binding Rossmann-like domain;; Pyridine nucleotide-disulphide oxidoreductase;; Thi4 family;; FAD binding domain;; Glucose inhibited division protein A	Polyamine oxidase (Precursor) GN=PAO OS=Zea mays (Maize) PE=1 SV=1	Q	Secondary metabolites biosynthesis, transport and catabolism	hypothetical protein AMTR_s00058p00159400 [Amborella trichopoda]
Gb_23342	0.999678	141	0.853061	161	0.338554	73	0	0	0	0	0	0	3.61377e-09	Inf	up	--	--	--	--	--	--	--	--	--	--	--	PREDICTED: uncharacterized protein LOC103708008 [Phoenix dactylifera]
NG_1190	0.5461	87	0.364076	77	0.54276	130	0	0	0	0	0	0	2.44427e-20	Inf	up	--	--	--	--	--	[R]	General function prediction only	--	--	S	Function unknown	PREDICTED: uncharacterized protein LOC103951630 [Pyrus x bretschneideri]
NG_15149	2.3582	178	2.28816	231	1.28249	146	0	0	0	0	0	0	5.32404e-19	Inf	up	--	--	--	--	--	--	--	Homeobox domain	WUSCHEL-related homeobox 3 OS=Arabidopsis thaliana OX=3702 GN=WOX3 PE=1 SV=1	--	--	putative wuschel homeobox protein WOX3A, partial [Ginkgo biloba]
NG_826	2.03026	98	2.06528	133	1.80793	130	0	0	0	0	0	0	5.28884e-23	Inf	up	[E]	Amino acid transport and metabolism	--	K01592|6.12765e-77|thj:104804035|K01592 tyrosine decarboxylase [EC:4.1.1.25] | (RefSeq) tyrosine decarboxylase 1-like	Tyrosine metabolism (ko00350);; Isoquinoline alkaloid biosynthesis (ko00950)	[E]	Amino acid transport and metabolism	Pyridoxal-dependent decarboxylase conserved domain	Tyrosine decarboxylase 1 OS=Arabidopsis thaliana OX=3702 GN=ELI5 PE=2 SV=1	E	Amino acid transport and metabolism	PREDICTED: tyrosine decarboxylase 1-like [Tarenaya hassleriana]
Gb_40635	3.10335	182	3.49538	274	4.71183	417	0.016853	3	0	0	0	0	1.21606e-36	8.72811	up	--	--	--	K16282|5.65664e-25|vvi:100262985|K16282 E3 ubiquitin-protein ligase RHA2 [EC:2.3.2.27] | (RefSeq) E3 ubiquitin-protein ligase RHA2A	--	[O]	Posttranslational modification, protein turnover, chaperones	Ring finger domain;; Zinc finger, C3HC4 type (RING finger)	E3 ubiquitin-protein ligase RHA2A GN=RHA2A OS=Arabidopsis thaliana (Mouse-ear cress) PE=1 SV=1	O	Posttranslational modification, protein turnover, chaperones	unknown [Picea sitchensis]
Gb_24476	47.8676	1116	55.6455	1733	55.848	1968	0.049324	3	0.373787	10	0.085395	3	4.0534e-126	8.07039	up	--	--	Biological Process: negative regulation of cell proliferation (GO:0008285);; Molecular Function: aspartic-type endopeptidase inhibitor activity (GO:0019828);; Biological Process: killing of cells of other organism (GO:0031640);; Biological Process: defense response to bacterium (GO:0042742);; Biological Process: defense response to fungus (GO:0050832);;	--	--	--	--	Salt stress response/antifungal	Antifungal protein ginkbilobin-2 (Precursor) GN=GNK2 OS=Ginkgo biloba (Ginkgo) PE=1 SV=1	S	Function unknown	RecName: Full=Antifungal protein ginkbilobin-2; Flags: Precursor [Ginkgo biloba]
Gb_24902	12.1397	1113	10.2518	1256	10.1537	1407	0.014725	3	0.110784	12	0.11036	11	4.5275e-93	6.98495	up	[Q]	Secondary metabolites biosynthesis, transport and catabolism	Molecular Function: monooxygenase activity (GO:0004497);; Molecular Function: iron ion binding (GO:0005506);; Molecular Function: electron carrier activity (GO:0009055);; Molecular Function: oxidoreductase activity, acting on paired donors, with incorporation or reduction of molecular oxygen (GO:0016705);; Molecular Function: heme binding (GO:0020037);; Biological Process: oxidation-reduction pro…	K20660|0|cam:101514124|K20660 cytochrome P450 family 709 | (RefSeq) cytochrome P450 734A1-like	--	[QI]	Secondary metabolites biosynthesis, transport and catabolism;; Lipid transport and metabolism	Cytochrome P450	Cytochrome P450 734A6 GN=OSJNBb0008D07.26 OS=Oryza sativa subsp. japonica (Rice) PE=2 SV=1	Q	Secondary metabolites biosynthesis, transport and catabolism	unknown [Picea sitchensis]
NG_24845	3.04188	306	2.49571	336	1.70094	259	0.058584	13	0	0	0	0	2.20895e-16	6.76381	up	--	--	Molecular Function: DNA binding (GO:0003677);; Cellular Component: nucleus (GO:0005634);;	--	--	--	--	--	WUSCHEL-related homeobox 3 OS=Arabidopsis thaliana OX=3702 GN=WOX3 PE=1 SV=1	K	Transcription	putative wuschel homeobox protein WOX3A, partial [Ginkgo biloba]
Gb_06093	7.20429	1210	4.62542	919	4.85978	1228	0.017667	5	0.109884	23	0.021218	5	5.71218e-17	6.56213	up	--	--	Molecular Function: acidic amino acid transmembrane transporter activity (GO:0015172);; Molecular Function: neutral amino acid transmembrane transporter activity (GO:0015175);; Molecular Function: primary active transmembrane transporter activity (GO:0015399);; Biological Process: acidic amino acid transport (GO:0015800);; Biological Process: neutral amino acid transport (GO:0015804);; Cellular C…	--	--	[E]	Amino acid transport and metabolism	Transmembrane amino acid transporter protein;; Tryptophan/tyrosine permease family	Amino acid permease 2 GN=AAP2 OS=Arabidopsis thaliana (Mouse-ear cress) PE=1 SV=1	E	Amino acid transport and metabolism	unknown [Picea sitchensis]
Gb_16565	28.0981	1169	19.8169	1048	16.5535	990	0.178713	15	0.194589	12	0.235354	10	1.28957e-15	6.50876	up	[O]	Posttranslational modification, protein turnover, chaperones	Molecular Function: transferase activity (GO:0016740);;	--	--	[O]	Posttranslational modification, protein turnover, chaperones	Glutathione S-transferase, C-terminal domain;; Glutathione S-transferase, N-terminal domain;; Glutathione S-transferase, N-terminal domain;; Glutathione S-transferase, C-terminal domain;; Glutathione S-transferase, N-terminal domain	Probable glutathione S-transferase OS=Nicotiana tabacum (Common tobacco) PE=2 SV=1	O	Posttranslational modification, protein turnover, chaperones	GST [Ginkgo biloba]
Gb_40198	10.0458	1543	8.58559	1782	8.35145	1959	0.108821	36	0.079045	14	0.103778	17	1.97696e-95	6.42826	up	[G]	Carbohydrate transport and metabolism	Molecular Function: hydrolase activity (GO:0016787);;	--	--	[G]	Carbohydrate transport and metabolism	Glycosyl hydrolases family 32 N-terminal domain;; Glycosyl hydrolases family 32 C terminal	Beta-fructofuranosidase, insoluble isoenzyme CWINV1 (Precursor) GN=MMM17.26 OS=Arabidopsis thaliana (Mouse-ear cress) PE=1 SV=1	G	Carbohydrate transport and metabolism	hypothetical protein AMTR_s00064p00137280 [Amborella trichopoda]
Gb_11187	8.76831	102	10.6972	166	4.58171	81	0.041925	1	0.081164	2	0.081732	1	3.5939e-10	6.38364	up	--	--	--	--	--	--	--	--	--	--	--	--
Gb_30745	11.2003	1060	7.89448	998	4.87228	697	0.085886	17	0.150399	16	0.073009	7	1.03682e-09	6.2245	up	[Q]	Secondary metabolites biosynthesis, transport and catabolism	Molecular Function: monooxygenase activity (GO:0004497);; Molecular Function: iron ion binding (GO:0005506);; Molecular Function: electron carrier activity (GO:0009055);; Molecular Function: oxidoreductase activity, acting on paired donors, with incorporation or reduction of molecular oxygen (GO:0016705);; Molecular Function: heme binding (GO:0020037);; Biological Process: shoot system developmen…	K20619|0|vvi:100257640|K20619 cytochrome P450 family 78 subfamily A | (RefSeq) cytochrome P450 78A7	--	[Q]	Secondary metabolites biosynthesis, transport and catabolism	Cytochrome P450	Cytochrome P450 78A4 GN=CYP78A4 OS=Pinus radiata (Monterey pine) PE=2 SV=1	Q	Secondary metabolites biosynthesis, transport and catabolism	RecName: Full=Cytochrome P450 78A4 [Pinus radiata]
Gb_07957	2.90925	161	3.4879	251	3.80201	304	0	0	0.141883	9	0	0	9.2495e-28	6.04185	up	--	--	--	--	--	--	--	--	--	--	--	--
Gb_31928	1.24638	161	0.713067	123	0.512769	100	0.003825	2	0.028673	5	0	0	1.94611e-06	5.83136	up	--	--	Biological Process: transcription, DNA-templated (GO:0006351);;	--	--	--	--	GRAS domain family	Scarecrow-like protein 32 GN=SCL32 OS=Arabidopsis thaliana (Mouse-ear cress) PE=2 SV=1	S	Function unknown	unnamed protein product [Coffea canephora]
Gb_16297	37.9709	4256	31.846	4772	32.5845	5522	0.784455	180	0.703198	87	0.444172	53	1.52724e-86	5.6655	up	--	--	Molecular Function: oxidoreductase activity, acting on the CH-NH group of donors, oxygen as acceptor (GO:0016647);; Biological Process: oxidation-reduction process (GO:0055114);;	--	--	[Q]	Secondary metabolites biosynthesis, transport and catabolism	Flavin containing amine oxidoreductase;; NAD(P)-binding Rossmann-like domain;; Pyridine nucleotide-disulphide oxidoreductase;; Thi4 family;; FAD binding domain;; FAD binding domain;; Flavin containing amine oxidoreductase	Polyamine oxidase (Precursor) GN=PAO OS=Zea mays (Maize) PE=1 SV=1	Q	Secondary metabolites biosynthesis, transport and catabolism	hypothetical protein AMTR_s00058p00159400 [Amborella trichopoda]
Gb_30497	1.00889	158	1.06346	222	1.13303	266	0.033735	11	0.011609	2	0.012869	3	1.4535e-22	5.56606	up	--	--	Cellular Component: membrane (GO:0016020);;	--	--	[R]	General function prediction only	Aluminium activated malate transporter;; Fusaric acid resistance protein-like	Aluminum-activated malate transporter 10 OS=Arabidopsis thaliana (Mouse-ear cress) PE=3 SV=2	R	General function prediction only	PREDICTED: aluminum-activated malate transporter 10-like [Pyrus x bretschneideri]
Gb_21398	2.82294	66	2.97153	93	2.81422	100	0.082543	4	0.078907	3	0	0	1.18215e-13	5.37786	up	--	--	Biological Process: negative regulation of cell proliferation (GO:0008285);; Molecular Function: aspartic-type endopeptidase inhibitor activity (GO:0019828);; Biological Process: killing of cells of other organism (GO:0031640);; Biological Process: defense response to bacterium (GO:0042742);; Biological Process: defense response to fungus (GO:0050832);;	--	--	--	--	Salt stress response/antifungal	Antifungal protein ginkbilobin-2 (Precursor) GN=GNK2 OS=Ginkgo biloba (Ginkgo) PE=1 SV=1	S	Function unknown	antimicrobial protein Gnk2-1 [Ginkgo biloba]
Gb_11826	2.64005	212	1.98112	213	1.78245	217	0.139665	23	0.000373	1	0	0	2.12572e-18	5.33024	up	[Q]	Secondary metabolites biosynthesis, transport and catabolism	Molecular Function: oxidoreductase activity (GO:0016491);; Biological Process: single-organism developmental process (GO:0044767);; Molecular Function: metal ion binding (GO:0046872);; Biological Process: system development (GO:0048731);;	K20619|9.7907e-122|pop:POPTR_0007s06570g|K20619 cytochrome P450 family 78 subfamily A | (RefSeq) POPTRDRAFT_562708; hypothetical protein	--	[Q]	Secondary metabolites biosynthesis, transport and catabolism	Cytochrome P450	Cytochrome P450 78A4 GN=CYP78A4 OS=Pinus radiata (Monterey pine) PE=2 SV=1	Q	Secondary metabolites biosynthesis, transport and catabolism	putative cytochrome P450 superfamily protein [Zea mays]
Gb_19566	11.7636	1357	16.4269	2647	20.6422	3700	0.304325	82	0.537583	85	0.270995	40	3.80228e-22	5.15829	up	[GEPR]	Carbohydrate transport and metabolism;; Amino acid transport and metabolism;; Inorganic ion transport and metabolism;; General function prediction only	Cellular Component: vacuole (GO:0005773);; Biological Process: carbohydrate transport (GO:0008643);; Molecular Function: carbohydrate transmembrane transporter activity (GO:0015144);; Cellular Component: integral component of membrane (GO:0016021);; Molecular Function: oxidoreductase activity (GO:0016491);; Biological Process: transmembrane transport (GO:0055085);;	K08145|2.34172e-165|pda:103710954|K08145 MFS transporter, SP family, solute carrier family 2 (facilitated glucose transporter), member 8 | (RefSeq) sugar transporter ERD6-like 16	--	[R]	General function prediction only	Sugar (and other) transporter;; Major Facilitator Superfamily	Sugar transporter ERD6-like 16 GN=At5g18840 OS=Arabidopsis thaliana (Mouse-ear cress) PE=2 SV=2	R	General function prediction only	unknown [Picea sitchensis]
Gb_32332	4.10223	260	3.96315	336	3.76364	361	0.12349	17	0.142988	10	0.040269	3	9.62566e-27	5.15619	up	--	--	--	--	--	--	--	--	--	R	General function prediction only	hypothetical protein AMTR_s00125p00062940 [Amborella trichopoda]
Gb_28658	19.6737	2466	20.707	3470	22.4323	4252	0.564558	145	0.833455	115	0.58034	74	1.06914e-117	4.94521	up	[C]	Energy production and conversion	Biological Process: metabolic process (GO:0008152);; Biological Process: cellular process (GO:0009987);; Molecular Function: oxidoreductase activity (GO:0016491);;	--	--	[C]	Energy production and conversion	Cytokinin dehydrogenase 1, FAD and cytokinin binding;; FAD binding domain	Cytokinin dehydrogenase 3 (Precursor) OS=Oryza sativa subsp. japonica (Rice) PE=2 SV=1	C	Energy production and conversion	hypothetical protein AMTR_s00029p00129160 [Amborella trichopoda]
Gb_08303	7.88921	1535	8.56483	2282	10.1091	2946	0.306686	127	0.273155	63	0.301276	58	1.90699e-92	4.83122	up	[V]	Defense mechanisms	Molecular Function: ATP binding (GO:0005524);; Cellular Component: plasma membrane (GO:0005886);; Biological Process: obsolete ATP catabolic process (GO:0006200);; Molecular Function: ATPase activity (GO:0016887);;	--	--	[Q]	Secondary metabolites biosynthesis, transport and catabolism	ABC-2 type transporter;; ABC transporter	ABC transporter G family member 22 GN=F15M7.6 OS=Arabidopsis thaliana (Mouse-ear cress) PE=1 SV=1	Q	Secondary metabolites biosynthesis, transport and catabolism	unknown [Picea sitchensis]
Gb_05070	19.4373	2865	0.449537	89	20.6953	4612	0.322497	98	0.437522	71	0.722651	108	0.0155863	4.74427	up	--	--	--	--	--	--	--	PB1 domain	--	S	Function unknown	unknown [Picea sitchensis]
Gb_21096	5.1101	116	4.17427	127	5.13999	176	0.262926	13	0.239289	6	0	0	7.31741e-15	4.7359	up	--	--	--	--	--	--	--	--	--	--	--	--
Gb_28893	1.91082	91	1.66522	105	1.43073	102	0.03136	4	0.138824	8	0	0	3.75414e-13	4.64933	up	--	--	--	--	--	--	--	Plant protein of unknown function (DUF822)	Beta-amylase 7 GN=F4I18.14 OS=Arabidopsis thaliana (Mouse-ear cress) PE=2 SV=2	S	Function unknown	hypothetical protein AMTR_s00155p00073540 [Amborella trichopoda]
Gb_07956	45.3081	1283	42.003	1589	50.2324	2150	3.1464	183	1.04392	33	1.15339	33	3.12302e-68	4.6193	up	--	--	--	--	--	--	--	--	--	--	--	--
Gb_14457	3.68459	349	1.74811	222	1.15136	165	0.073589	15	0.062575	7	0.122174	13	0.00194263	4.53981	up	--	--	--	--	--	--	--	Acetyltransferase (GNAT) family;; FR47-like protein	Probable N-acetyltransferase HLS1 GN=F19F18.70 OS=Arabidopsis thaliana (Mouse-ear cress) PE=1 SV=1	R	General function prediction only	PREDICTED: probable N-acetyltransferase HLS1 [Nelumbo nucifera]
Gb_34637	1.28544	231	0.688136	166	0.570521	155	0.112257	42	0	0	0	0	0.000327226	4.40702	up	--	--	Biological Process: regulation of transcription, DNA-templated (GO:0006355);; Molecular Function: ligase activity (GO:0016874);;	K14494|0|mdm:103406741|K14494 DELLA protein | (RefSeq) L3b; DELLA protein GAI-like	Plant hormone signal transduction (ko04075)	--	--	GRAS domain family;; Transcriptional regulator DELLA protein N terminal	DELLA protein GAIP GN=GAIP OS=Cucurbita maxima (Pumpkin) PE=2 SV=1	K	Transcription	RGA [Pinus tabuliformis]
Gb_32481	0.649661	77	0.925323	145	0.566534	100	0.074306	18	0.023422	3	0	0	2.52835e-11	4.37656	up	[E]	Amino acid transport and metabolism	--	--	--	[E]	Amino acid transport and metabolism	POT family;; Major Facilitator Superfamily	Protein NRT1/ PTR FAMILY 6.1 GN=NPF6.1 OS=Arabidopsis thaliana (Mouse-ear cress) PE=2 SV=1	E	Amino acid transport and metabolism	PREDICTED: protein NRT1/ PTR FAMILY 6.1 [Solanum lycopersicum]
Gb_34207	4.03539	584	3.72457	737	3.57089	786	0.161419	43	0.19185	32	0.190113	29	1.24194e-37	4.35889	up	[R]	General function prediction only	Molecular Function: voltage-gated ion channel activity (GO:0005244);; Molecular Function: potassium channel activity (GO:0005267);; Biological Process: ion transport (GO:0006811);; Cellular Component: plastid (GO:0009536);; Cellular Component: membrane (GO:0016020);; Biological Process: transmembrane transport (GO:0055085);;	--	--	[PT]	Inorganic ion transport and metabolism;; Signal transduction mechanisms	Ankyrin repeats (3 copies);; Ankyrin repeats (many copies);; Ankyrin repeat;; Domain of unknown function (DUF3354);; Ankyrin repeats (many copies);; Ion transport protein;; Ankyrin repeat;; Cyclic nucleotide-binding domain;; Ion channel	Potassium channel AKT2 OS=Oryza sativa subsp. japonica (Rice) PE=2 SV=1	P	Inorganic ion transport and metabolism	PREDICTED: potassium channel AKT2 [Phoenix dactylifera]
NG_13128	1.53289	69	1.4913	88	1.15227	76	0.172028	8	0	0	0.08916	5	1.82856e-10	4.34638	up	--	--	Molecular Function: DNA binding (GO:0003677);;	--	--	[K]	Transcription	Myb-like DNA-binding domain	Transcription factor MYB113 OS=Arabidopsis thaliana OX=3702 GN=MYB113 PE=1 SV=1	K	Transcription	PREDICTED: MYB-like transcription factor ETC1 isoform X1 [Populus euphratica]
Gb_32598	0.797625	130	1.23083	272	1.25149	310	0.059193	20	0.077526	14	0.023492	4	2.63621e-18	4.29425	up	--	--	Molecular Function: diacylglycerol kinase activity (GO:0004143);; Biological Process: protein kinase C-activating G-protein coupled receptor signaling pathway (GO:0007205);; Biological Process: phosphorylation (GO:0016310);; Biological Process: intracellular signal transduction (GO:0035556);;	K00901|1.56009e-79|osa:9266342|K00901 diacylglycerol kinase (ATP) [EC:2.7.1.107] | (RefSeq) diacylglycerol kinase 1	--	[IT]	Lipid transport and metabolism;; Signal transduction mechanisms	Diacylglycerol kinase catalytic domain;; Diacylglycerol kinase accessory domain	Diacylglycerol kinase 1 GN=DGK1 OS=Arabidopsis thaliana (Mouse-ear cress) PE=1 SV=2	I	Lipid transport and metabolism	Os03g0425300 [Oryza sativa Japonica Group]
Gb_14026	8.01516	471	5.76482	454	4.73269	422	0.025448	4	0.623209	48	0.181826	13	5.30224e-12	4.2057	up	[R]	General function prediction only	Molecular Function: iron ion binding (GO:0005506);; Molecular Function: flavonol synthase activity (GO:0045431);; Biological Process: flavonol biosynthetic process (GO:0051555);; Biological Process: oxidation-reduction process (GO:0055114);;	K05278|1.35406e-137|cam:101504604|K05278 flavonol synthase [EC:1.14.11.23] | (RefSeq) flavonol synthase/flavanone 3-hydroxylase-like	Flavonoid biosynthesis (ko00941)	[QR]	Secondary metabolites biosynthesis, transport and catabolism;; General function prediction only	non-haem dioxygenase in morphine synthesis N-terminal;; 2OG-Fe(II) oxygenase superfamily	Flavonol synthase/flavanone 3-hydroxylase GN=FLS OS=Citrus unshiu (Satsuma mandarin) PE=1 SV=1	Q	Secondary metabolites biosynthesis, transport and catabolism	flavonol synthase [Ginkgo biloba]
Gb_03769	2.18935	322	1.418	279	1.15635	257	0.047893	15	0.101462	17	0.101032	15	5.39177e-08	4.19911	up	[M]	Cell wall/membrane/envelope biogenesis	Cellular Component: membrane (GO:0016020);; Molecular Function: transferase activity, transferring glycosyl groups (GO:0016757);;	--	--	--	--	Cellulose synthase;; Glycosyl transferase family group 2	Cellulose synthase-like protein H1 GN=OSJNBa0035F15.9 OS=Oryza sativa subsp. japonica (Rice) PE=2 SV=2	S	Function unknown	unknown [Picea sitchensis]
Gb_30377	31.4585	4240	29.3616	5290	30.3308	6180	1.83537	507	1.79966	265	1.20455	164	4.91799e-100	4.19447	up	[Q]	Secondary metabolites biosynthesis, transport and catabolism	Molecular Function: iron ion binding (GO:0005506);; Cellular Component: extracellular region (GO:0005576);; Molecular Function: electron carrier activity (GO:0009055);; Biological Process: response to red or far red light (GO:0009639);; Biological Process: abscisic acid metabolic process (GO:0009687);; Molecular Function: (+)-abscisic acid 8'-hydroxylase activity (GO:0010295);; Molecular Function…	K09843|0|brp:103861043|K09843 (+)-abscisic acid 8'-hydroxylase [EC:1.14.13.93] | (RefSeq) abscisic acid 8'-hydroxylase 1	Carotenoid biosynthesis (ko00906)	[QI]	Secondary metabolites biosynthesis, transport and catabolism;; Lipid transport and metabolism	Cytochrome P450	Abscisic acid 8&apos;-hydroxylase 1 GN=CYP707A1 OS=Arabidopsis thaliana (Mouse-ear cress) PE=2 SV=1	Q	Secondary metabolites biosynthesis, transport and catabolism	hypothetical protein AALP_AA7G017200 [Arabis alpina]
Gb_26508	65.0778	1224	66.7554	1679	67.0716	1908	3.21406	124	4.37484	90	3.61375	69	1.17424e-61	4.11254	up	--	--	Cellular Component: extracellular region (GO:0005576);; Molecular Function: growth factor activity (GO:0008083);; Biological Process: cell proliferation (GO:0008283);;	--	--	--	--	Phytosulfokine precursor protein (PSK)	Phytosulfokine-beta (Precursor) GN=PSK OS=Asparagus officinalis (Garden asparagus) PE=1 SV=1	R	General function prediction only	hypothetical protein PRUPE_ppa022767mg [Prunus persica]
Gb_10849	2.72691	69	4.73144	159	2.04027	78	0.156824	9	0.15268	5	0.195936	5	1.03217e-05	4.06921	up	--	--	--	--	--	--	--	--	--	S	Function unknown	hypothetical protein PRUPE_ppa020389mg [Prunus persica]
Gb_21514	6.39978	437	4.42692	404	4.62368	477	0.302921	43	0.44965	34	0.155734	11	7.80176e-16	4.03316	up	--	--	--	--	--	--	--	F-box domain	Protein UNUSUAL FLORAL ORGANS GN=F17F8.16 OS=Arabidopsis thaliana (Mouse-ear cress) PE=1 SV=2	R	General function prediction only	unknown [Picea sitchensis]
Gb_16085	1473.21	31775	1233.7	35570	1320.04	43057	80.0451	3535	91.0222	2145	70.835	1537	8.81381e-69	4.02409	up	--	--	Cellular Component: extracellular region (GO:0005576);; Cellular Component: cytoplasmic vesicle (GO:0016023);; Biological Process: defense response to fungus (GO:0050832);;	--	--	--	--	Gamma-thionin family	Defensin-like protein (Precursor) OS=Nelumbo nucifera (Sacred lotus) PE=3 SV=1	R	General function prediction only	PREDICTED: defensin-like protein [Nelumbo nucifera]
Gb_07601	2.13075	201	0.904586	114	1.36022	194	0.138137	27	0.117431	13	0	0	8.88263e-05	4.00409	up	--	--	Molecular Function: GTPase activity (GO:0003924);; Molecular Function: calcium ion binding (GO:0005509);; Molecular Function: GTP binding (GO:0005525);; Cellular Component: cytoplasm (GO:0005737);; Biological Process: obsolete GTP catabolic process (GO:0006184);; Biological Process: vesicle-mediated transport (GO:0016192);; Cellular Component: intracellular membrane-bounded organelle (GO:0043231)…	K12483|0|pda:103718510|K12483 EH domain-containing protein 1 | (RefSeq) EH domain-containing protein 1-like	Endocytosis (ko04144)	[TU]	Signal transduction mechanisms;; Intracellular trafficking, secretion, and vesicular transport	Dynamin family;; 50S ribosome-binding GTPase;; Cytoskeletal-regulatory complex EF hand;; EF hand;; Elongation factor Tu GTP binding domain	--	TU	Signal transduction mechanisms;; Intracellular trafficking, secretion, and vesicular transport	PREDICTED: EH domain-containing protein 1-like isoform X1 [Phoenix dactylifera]
Gb_27406	5.60281	769	5.35279	981	5.75385	1185	0.347454	98	0.392262	59	0.28609	38	3.5526e-41	3.99675	up	[C]	Energy production and conversion	Cellular Component: extracellular region (GO:0005576);; Biological Process: jasmonic acid metabolic process (GO:0009694);; Biological Process: response to jasmonic acid (GO:0009753);; Biological Process: cytokinin catabolic process (GO:0009823);; Molecular Function: oxidoreductase activity, acting on CH-OH group of donors (GO:0016614);; Molecular Function: cytokinin dehydrogenase activity (GO:001…	K00279|5.74259e-176|vvi:100267760|K00279 cytokinin dehydrogenase [EC:1.5.99.12] | (RefSeq) cytokinin dehydrogenase 5	Zeatin biosynthesis (ko00908)	[C]	Energy production and conversion	Cytokinin dehydrogenase 1, FAD and cytokinin binding;; FAD binding domain	Cytokinin dehydrogenase 5 (Precursor) GN=F1B16.2 OS=Arabidopsis thaliana (Mouse-ear cress) PE=2 SV=1	C	Energy production and conversion	PREDICTED: cytokinin dehydrogenase 5 isoform X1 [Vitis vinifera]
Gb_17672	7.97859	227	6.59609	276	6.47866	269	0.027978	3	0.942942	23	0.435792	16	1.79313e-19	3.98331	up	--	--	Cellular Component: extracellular region (GO:0005576);; Biological Process: cell-cell signaling (GO:0007267);; Biological Process: stomatal complex patterning (GO:0010375);; Biological Process: mRNA modification (GO:0016556);; Biological Process: positive regulation of stomatal complex development (GO:2000123);;	--	--	--	--	--	Stomagen {ECO:0000303|PubMed:20010603} (Precursor) GN=F25G13.60 OS=Arabidopsis thaliana (Mouse-ear cress) PE=1 SV=1	R	General function prediction only	PREDICTED: EPIDERMAL PATTERNING FACTOR-like protein 9-like [Cicer arietinum]
Gb_02790	1.05816	87	1.65398	181	1.32875	165	0.094378	16	0.022611	3	0.117184	10	7.50483e-13	3.97416	up	--	--	Molecular Function: DNA binding (GO:0003677);; Molecular Function: transcription factor activity, sequence-specific DNA binding (GO:0003700);; Cellular Component: nucleus (GO:0005634);; Biological Process: regulation of transcription, DNA-templated (GO:0006355);;	--	--	--	--	AP2 domain	Ethylene-responsive transcription factor LEP GN=MAC12.13 OS=Arabidopsis thaliana (Mouse-ear cress) PE=2 SV=1	K	Transcription	hypothetical protein AMTR_s00016p00238800 [Amborella trichopoda]
NG_494	0.933503	95	2.0231	276	2.18681	337	0.089514	19	0.100164	12	0.118308	13	1.21623e-07	3.9388	up	[G]	Carbohydrate transport and metabolism	Molecular Function: hydrolase activity, hydrolyzing O-glycosyl compounds (GO:0004553);; Biological Process: metabolic process (GO:0008152);; Cellular Component: membrane (GO:0016020);;	--	--	--	--	Glycosyl hydrolases family 28;; Pectate lyase superfamily protein	Polygalacturonase At1g48100 OS=Arabidopsis thaliana OX=3702 GN=At1g48100 PE=2 SV=1	M	Cell wall/membrane/envelope biogenesis	polygalacturonase At1g48100-like [Asparagus officinalis]
NG_10181	24.5259	1298	18.6118	1317	19.2381	1540	1.33426	145	1.9963	116	1.07461	58	4.74842e-25	3.78533	up	--	--	Biological Process: multicellular organism development (GO:0007275);;	--	--	--	--	YABBY protein;; HMG-box domain	Axial regulator YABBY 5 OS=Arabidopsis thaliana OX=3702 GN=YAB5 PE=1 SV=1	K	Transcription	YABBY transcription factor [Ginkgo biloba]
Gb_19533	8.24445	372	7.06944	426	7.84515	535	0.683978	64	0.596113	30	0.328269	15	6.45075e-22	3.78439	up	--	--	--	--	--	--	--	Cotton fibre expressed protein	--	S	Function unknown	PREDICTED: uncharacterized protein LOC104593268 [Nelumbo nucifera]
Gb_07480	24.0713	2325	23.1598	2996	22.5066	3294	1.38482	270	2.03181	211	1.58781	156	1.22254e-75	3.78253	up	[G]	Carbohydrate transport and metabolism	Molecular Function: hydrolase activity, hydrolyzing O-glycosyl compounds (GO:0004553);; Biological Process: metabolic process (GO:0008152);; Cellular Component: cytoplasmic vesicle (GO:0016023);;	--	--	[G]	Carbohydrate transport and metabolism	Glycosyl hydrolase family 1	Beta-glucosidase 22 (Precursor) GN=OSJNBa0090H02.10 OS=Oryza sativa subsp. japonica (Rice) PE=2 SV=1	G	Carbohydrate transport and metabolism	hypothetical protein AMTR_s00057p00222890 [Amborella trichopoda]
Gb_00649	0.837277	77	1.16567	143	0.909822	127	0.158898	30	0	0	0.032739	4	1.43484e-09	3.77471	up	--	--	Cellular Component: membrane (GO:0016020);;	--	--	[R]	General function prediction only	Aluminium activated malate transporter;; Fusaric acid resistance protein-like;; Fusaric acid resistance protein family	Aluminum-activated malate transporter 9 GN=ALMT9 OS=Arabidopsis thaliana (Mouse-ear cress) PE=2 SV=1	R	General function prediction only	PREDICTED: aluminum-activated malate transporter 9-like [Phoenix dactylifera]
Gb_25645	15.0998	1329	11.4423	1347	11.5464	1537	0.917457	166	1.02272	99	0.822261	73	7.9081e-23	3.7486	up	[V]	Defense mechanisms	Biological Process: drug transmembrane transport (GO:0006855);; Molecular Function: drug transmembrane transporter activity (GO:0015238);; Molecular Function: antiporter activity (GO:0015297);; Cellular Component: membrane (GO:0016020);;	--	--	[R]	General function prediction only	MatE	MATE efflux family protein 9 GN=F3L12.7 OS=Arabidopsis thaliana (Mouse-ear cress) PE=2 SV=1	S	Function unknown	hypothetical protein AMTR_s00070p00181900 [Amborella trichopoda]
Gb_23274	4.59138	324	3.78959	359	3.14904	337	0.388976	64	0.2258	20	0.113611	10	3.70047e-16	3.73119	up	--	--	Cellular Component: integral component of plasma membrane (GO:0005887);; Biological Process: carbohydrate transport (GO:0008643);; Molecular Function: sugar transmembrane transporter activity (GO:0051119);;	K15382|2.65059e-79|crb:CARUB_v10028480mg|K15382 solute carrier family 50 (sugar transporter) | (RefSeq) hypothetical protein	--	[R]	General function prediction only	Sugar efflux transporter for intercellular exchange	Bidirectional sugar transporter SWEET3 GN=SWEET3 OS=Arabidopsis thaliana (Mouse-ear cress) PE=2 SV=1	P	Inorganic ion transport and metabolism	unknown [Picea sitchensis]
Gb_09103	7.79887	1288	6.68576	1476	5.85121	1462	0.609744	207	0.574427	104	0.326406	55	1.36642e-26	3.70539	up	--	--	--	--	--	--	--	Protein of unknown function (DUF3049)	Protein FAF-like, chloroplastic (Precursor) GN=At5g22090 OS=Arabidopsis thaliana (Mouse-ear cress) PE=2 SV=1	S	Function unknown	PREDICTED: protein FAF-like, chloroplastic [Prunus mume]
Gb_37787	1.08136	248	0.937451	287	0.852883	295	0.091973	44	0.054093	14	0.061183	15	5.275e-16	3.70139	up	--	--	Biological Process: tissue development (GO:0009888);; Biological Process: root morphogenesis (GO:0010015);; Cellular Component: membrane part (GO:0044425);; Cellular Component: cell part (GO:0044464);; Biological Process: single-organism cellular process (GO:0044763);; Biological Process: single-organism transport (GO:0044765);;	K13947|0|pop:POPTR_0010s12320g|K13947 auxin efflux carrier family | (RefSeq) POPTRDRAFT_231887; PIN1-like family protein	--	--	--	Membrane transport protein	Auxin efflux carrier component 3 GN=PIN3 OS=Arabidopsis thaliana (Mouse-ear cress) PE=1 SV=1	P	Inorganic ion transport and metabolism	PIN-like protein, partial [Podocarpus rubens]
Gb_17757	6.18567	554	4.68596	561	3.93938	534	0.382936	71	0.322267	32	0.406222	37	1.68911e-12	3.69112	up	[Q]	Secondary metabolites biosynthesis, transport and catabolism	Molecular Function: binding (GO:0005488);; Molecular Function: oxidoreductase activity (GO:0016491);;	--	--	[Q]	Secondary metabolites biosynthesis, transport and catabolism	Cytochrome P450	Cytochrome P450 82C4 GN=CYP82C4 OS=Arabidopsis thaliana (Mouse-ear cress) PE=2 SV=1	Q	Secondary metabolites biosynthesis, transport and catabolism	hypothetical protein AMTR_s00066p00165020 [Amborella trichopoda]
Gb_00260	85.6843	6901	77.8369	8383	74.9366	9130	6.16457	1011	5.71333	497	6.32815	508	6.7915e-82	3.69099	up	--	--	Molecular Function: peroxidase activity (GO:0004601);; Biological Process: response to oxidative stress (GO:0006979);; Molecular Function: heme binding (GO:0020037);; Molecular Function: metal ion binding (GO:0046872);; Biological Process: oxidation-reduction process (GO:0055114);;	--	--	--	--	Peroxidase	Peroxidase 51 (Precursor) OS=Arabidopsis thaliana (Mouse-ear cress) PE=2 SV=1	G	Carbohydrate transport and metabolism	PREDICTED: peroxidase 41-like [Nelumbo nucifera]
Gb_04352	2.98739	110	3.43095	169	3.07261	171	0.160669	13	0.54953	23	0	0	4.13454e-12	3.63992	up	--	--	--	--	--	--	--	--	--	--	--	--
Gb_01978	3.00322	121	2.28422	122	1.45813	88	0.186467	18	0.067476	5	0.128302	8	5.36039e-06	3.63554	up	--	--	--	--	--	--	--	Alpha/beta hydrolase family	Methylesterase 17 GN=MES17 OS=Arabidopsis thaliana (Mouse-ear cress) PE=1 SV=1	R	General function prediction only	unknown [Picea sitchensis]
Gb_19143	8.18117	803	6.18745	812	5.39945	802	0.473595	96	0.648767	70	0.462456	46	1.05038e-13	3.60453	up	--	--	Molecular Function: transferase activity (GO:0016740);;	--	--	[GC]	Carbohydrate transport and metabolism;; Energy production and conversion	UDP-glucoronosyl and UDP-glucosyl transferase	UDP-glycosyltransferase 92A1 GN=UGT92A1 OS=Arabidopsis thaliana (Mouse-ear cress) PE=2 SV=1	CG	Energy production and conversion;; Carbohydrate transport and metabolism	unknown [Picea sitchensis]
Gb_12031	4.8423	216	3.53234	211	3.45945	234	0.204538	19	0.408129	21	0.315157	15	1.21424e-14	3.58588	up	[R]	General function prediction only	--	K06995|2.25835e-17|pda:103701618|K06995 uncharacterized protein | (RefSeq) uncharacterized LOC103701618	--	--	--	--	--	S	Function unknown	unknown [Picea sitchensis]
Gb_07207	39.5406	833	33.2071	935	33.6192	1071	2.95326	128	3.03169	70	2.6946	58	2.03454e-34	3.57155	up	--	--	--	--	--	--	--	--	--	--	--	--
Gb_07327	1.02208	232	1.03124	313	0.849954	291	0.090595	42	0.091253	23	0.061156	14	2.06079e-15	3.53284	up	--	--	--	--	--	--	--	--	--	--	--	--
NG_9459	4.01793	269	4.38397	385	3.43851	340	0.379093	53	0.228958	17	0.361796	25	6.71845e-17	3.52315	up	--	--	Cellular Component: cytoplasm (GO:0005737);; Biological Process: metal ion transport (GO:0030001);; Molecular Function: transition metal ion binding (GO:0046914);; Biological Process: cellular transition metal ion homeostasis (GO:0046916);;	--	--	[P]	Inorganic ion transport and metabolism	Heavy-metal-associated domain	Heavy metal-associated isoprenylated plant protein 45 OS=Arabidopsis thaliana OX=3702 GN=HIPP45 PE=3 SV=1	S	Function unknown	PREDICTED: uncharacterized protein LOC105139118 [Populus euphratica]
Gb_34188	3.37669	284	3.25326	366	2.14737	273	0.304574	53	0.242034	23	0.184358	16	3.47356e-12	3.51838	up	[R]	General function prediction only	Molecular Function: oxidoreductase activity, acting on paired donors, with incorporation or reduction of molecular oxygen, 2-oxoglutarate as one donor, and incorporation of one atom each of oxygen into both donors (GO:0016706);;	K05282|1.55492e-147|tcc:TCM_015040|K05282 gibberellin 20-oxidase [EC:1.14.11.12] | (RefSeq) 2-oxoglutarate and Fe(II)-dependent oxygenase superfamily protein isoform 1	Diterpenoid biosynthesis (ko00904)	[QR]	Secondary metabolites biosynthesis, transport and catabolism;; General function prediction only	non-haem dioxygenase in morphine synthesis N-terminal;; 2OG-Fe(II) oxygenase superfamily	Gibberellin 20 oxidase 2 GN=MIO24.5 OS=Arabidopsis thaliana (Mouse-ear cress) PE=2 SV=1	Q	Secondary metabolites biosynthesis, transport and catabolism	GA20ox1, partial [Pinus tabuliformis]
Gb_00480	3.41923	410	2.85821	461	2.30357	437	0.546756	38	0.282072	40	0.268395	35	1.1943e-19	3.51681	up	--	--	Cellular Component: cytoplasmic vesicle (GO:0016023);;	--	--	--	--	X8 domain	Glucan endo-1,3-beta-glucosidase 13 (Precursor) GN=At5g56590 OS=Arabidopsis thaliana (Mouse-ear cress) PE=1 SV=1	R	General function prediction only	unknown [Picea sitchensis]
Gb_35657	7.3632	975	4.65078	823	5.90854	1183	0.996618	271	0.110628	16	0.401041	54	1.90027e-10	3.5096	up	[O]	Posttranslational modification, protein turnover, chaperones	Molecular Function: peptidase activity (GO:0008233);;	--	--	--	--	Subtilase family;; PA domain;; Peptidase inhibitor I9	Subtilisin-like protease (Precursor) GN=At5g67360 OS=Arabidopsis thaliana (Mouse-ear cress) PE=1 SV=1	O	Posttranslational modification, protein turnover, chaperones	subtilase family protein [Populus trichocarpa]
Gb_03095	7.73374	364	6.75727	422	6.56133	461	0.513938	51	0.700564	37	0.595495	29	1.24547e-19	3.46194	up	--	--	--	--	--	--	--	Tubby C 2	Protein LURP-one-related 12 GN=At3g15810 OS=Arabidopsis thaliana (Mouse-ear cress) PE=2 SV=1	S	Function unknown	unnamed protein product [Coffea canephora]
Gb_37600	8.48822	774	6.57283	801	3.52479	486	0.495058	93	0.505062	51	0.650126	60	6.2628e-05	3.46139	up	[Q]	Secondary metabolites biosynthesis, transport and catabolism	Molecular Function: binding (GO:0005488);; Molecular Function: oxidoreductase activity (GO:0016491);; Biological Process: single-organism metabolic process (GO:0044710);;	K15402|0|fve:101314941|K15402 fatty acid omega-hydroxylase [EC:1.14.-.-] | (RefSeq) cytochrome P450 86B1	Cutin, suberine and wax biosynthesis (ko00073)	[QI]	Secondary metabolites biosynthesis, transport and catabolism;; Lipid transport and metabolism	Cytochrome P450	Cytochrome P450 86B1 GN=CYP86B1 OS=Arabidopsis thaliana (Mouse-ear cress) PE=2 SV=1	Q	Secondary metabolites biosynthesis, transport and catabolism	PREDICTED: cytochrome P450 86B1-like [Fragaria vesca subsp. vesca]
Gb_22719	0.839562	163	1.26174	328	1.18578	348	0.084571	34	0.105081	23	0.093006	19	1.28295e-15	3.45913	up	--	--	Biological Process: polysaccharide metabolic process (GO:0005976);; Biological Process: phosphate-containing compound metabolic process (GO:0006796);; Biological Process: cellular component organization (GO:0016043);; Biological Process: organophosphate metabolic process (GO:0019637);; Biological Process: cellular biosynthetic process (GO:0044249);; Biological Process: cellular macromolecule meta…	--	--	[R]	General function prediction only	PPR repeat family;; PPR repeat;; PPR repeat;; Pentatricopeptide repeat domain;; Tetratricopeptide repeat;; Tetratricopeptide repeat;; Anaphase-promoting complex, cyclosome, subunit 3;; Tetratricopeptide repeat;; Tetratricopeptide repeat;; Bacterial transcriptional activator domain;; Mitochondrial 28S ribosomal protein S27;; Evolutionarily conserved signalling intermediate in Toll pathway;; Replic…	Pentatricopeptide repeat-containing protein At4g31850, chloroplastic (Precursor) GN=PGR3 OS=Arabidopsis thaliana (Mouse-ear cress) PE=1 SV=1	R	General function prediction only	PREDICTED: pentatricopeptide repeat-containing protein At4g31850, chloroplastic-like [Nelumbo nucifera]
Gb_23788	19.5827	548	15.6291	584	19.6796	832	1.15502	67	2.06944	64	1.78409	51	3.46983e-26	3.40807	up	--	--	--	--	--	--	--	--	--	--	--	unknown [Picea sitchensis]
Gb_32483	0.972131	64	1.17147	103	0.914527	91	0	0	0.12676	10	0.147465	10	1.5069e-09	3.38947	up	--	--	--	--	--	[E]	Amino acid transport and metabolism	POT family;; POT family	Protein NRT1/ PTR FAMILY 6.1 GN=NPF6.1 OS=Arabidopsis thaliana (Mouse-ear cress) PE=2 SV=1	E	Amino acid transport and metabolism	major facilitator superfamily protein, partial [Pandanus utilis]
Gb_11201	0.754102	93	0.811477	114	1.00822	163	0	0	0.205392	28	0.013853	2	5.62626e-11	3.35695	up	--	--	Biological Process: regulation of cyclin-dependent protein serine/threonine kinase activity (GO:0000079);; Molecular Function: protein kinase binding (GO:0019901);;	--	--	[R]	General function prediction only	Cyclin;; Cyclin, N-terminal domain	Cyclin-U2-2 GN=CYCU2-2 OS=Arabidopsis thaliana (Mouse-ear cress) PE=1 SV=1	R	General function prediction only	PREDICTED: cyclin-U2-1 [Nelumbo nucifera]
NG_15637	0.589619	77	0.552311	96	0.467709	92	0.10663	29	0.041685	6	0	0	3.46861e-07	3.35114	up	[E]	Amino acid transport and metabolism	Cellular Component: membrane (GO:0016020);;	--	--	[E]	Amino acid transport and metabolism	POT family	Protein NRT1/ PTR FAMILY 4.3 OS=Arabidopsis thaliana OX=3702 GN=NPF4.3 PE=2 SV=1	E	Amino acid transport and metabolism	NPF family transporter [Pinus pinaster]
Gb_25531	5.14115	621	4.38685	708	4.26563	779	0.422642	105	0.331713	44	0.569974	70	1.00672e-25	3.34046	up	--	--	--	--	--	[K]	Transcription	GATA zinc finger	Putative GATA transcription factor 22 GN=GATA22 OS=Arabidopsis thaliana (Mouse-ear cress) PE=3 SV=1	K	Transcription	unknown [Picea sitchensis]
Gb_22524	1.06405	88	1.27546	141	1.04102	130	0.084761	15	0.148237	14	0.110561	10	3.05292e-09	3.18655	up	--	--	--	--	--	--	--	EamA-like transporter family	WAT1-related protein At5g07050 GN=At5g07050 OS=Arabidopsis thaliana (Mouse-ear cress) PE=2 SV=1	S	Function unknown	unknown [Picea sitchensis]
Gb_27442	0.825651	79	0.718797	92	0.60421	87	0.067289	14	0.057845	7	0.084276	9	9.99362e-08	3.1826	up	--	--	--	--	--	--	--	--	--	--	--	unknown [Picea sitchensis]
Gb_26541	10.26	656	10.9814	938	12.1964	1178	1.30892	172	1.39783	98	0.901388	58	4.3127e-28	3.16628	up	[E]	Amino acid transport and metabolism	Molecular Function: spermidine synthase activity (GO:0004766);; Biological Process: metabolic process (GO:0008152);;	--	--	[E]	Amino acid transport and metabolism	Spermine/spermidine synthase	Thermospermine synthase ACAULIS5 GN=T20D1.50 OS=Arabidopsis thaliana (Mouse-ear cress) PE=1 SV=1	E	Amino acid transport and metabolism	putative spermine synthase [Pinus sylvestris]
Gb_05698	12.5663	606	8.57603	553	8.29573	605	1.42475	141	1.16252	62	0.6185	30	7.72662e-09	3.154	up	[G]	Carbohydrate transport and metabolism	Biological Process: metabolic process (GO:0008152);; Molecular Function: hydrolase activity, acting on glycosyl bonds (GO:0016798);;	--	--	[G]	Carbohydrate transport and metabolism	Glycosyl hydrolase family 1	Beta-glucosidase 24 (Precursor) OS=Oryza sativa subsp. japonica (Rice) PE=2 SV=1	G	Carbohydrate transport and metabolism	hypothetical protein AMTR_s00022p00199830, partial [Amborella trichopoda]
Gb_20980	1.44939	67	1.61628	99	1.82452	127	0.21782	21	0.208642	11	0.094423	5	1.101e-07	3.10777	up	[P]	Inorganic ion transport and metabolism	Molecular Function: lyase activity (GO:0016829);; Molecular Function: metal ion binding (GO:0046872);;	K01674|9.48905e-112|mus:103984038|K01674 carbonic anhydrase [EC:4.2.1.1] | (RefSeq) alpha carbonic anhydrase 7-like	Nitrogen metabolism (ko00910)	[R]	General function prediction only	Eukaryotic-type carbonic anhydrase	Alpha carbonic anhydrase 7 (Precursor) GN=ACA7 OS=Arabidopsis thaliana (Mouse-ear cress) PE=2 SV=1	R	General function prediction only	unknown [Picea sitchensis]
NG_21127	3.20322	157	4.00443	265	4.39674	328	0.351175	36	0.499932	28	0.45986	24	1.30672e-12	3.05798	up	--	--	--	--	--	--	--	Homeobox domain	WUSCHEL-related homeobox 2 OS=Arabidopsis thaliana OX=3702 GN=WOX2 PE=2 SV=1	K	Transcription	wuschel related homeobox 1, partial [Calibrachoa parviflora]
Gb_20908	34.659	604	31.8657	743	30.2881	799	3.97028	142	3.70994	71	3.76347	66	2.3054e-22	3.04386	up	--	--	--	--	--	--	--	--	--	--	--	--
Gb_00966	29.1978	2076	30.6471	2913	31.3667	3373	4.09911	597	3.57525	278	3.09501	222	5.95144e-51	3.04029	up	--	--	Cellular Component: integral component of plasma membrane (GO:0005887);; Cellular Component: cell cortex (GO:0005938);; Biological Process: response to abiotic stimulus (GO:0009628);; Cellular Component: plant-type vacuole membrane (GO:0009705);; Biological Process: auxin-activated signaling pathway (GO:0009734);; Biological Process: unidimensional cell growth (GO:0009826);; Biological Process: p…	--	--	--	--	EamA-like transporter family	Auxin-induced protein 5NG4 OS=Pinus taeda (Loblolly pine) PE=2 SV=1	S	Function unknown	RecName: Full=Auxin-induced protein 5NG4 [Pinus taeda]
Gb_22423	48.9715	3223	35.4055	3102	38.2754	3804	5.18332	691	5.05098	366	4.37189	292	1.00466e-15	3.03368	up	--	--	Biological Process: regulation of gene expression (GO:0010468);; Biological Process: single-organism cellular process (GO:0044763);; Biological Process: regulation of primary metabolic process (GO:0080090);; Biological Process: regulation of cellular macromolecule biosynthetic process (GO:2000112);;	--	--	--	--	YABBY protein;; Protein of unknown function (DUF3133)	Protein YABBY 2 OS=Oryza sativa subsp. japonica (Rice) PE=2 SV=1	K	Transcription	PREDICTED: protein YABBY 2-like [Musa acuminata subsp. malaccensis]
NG_19455	1.639	144	2.58041	300	2.48055	328	0.037858	7	0.439408	43	0.311957	28	4.35832e-14	3.03109	up	--	--	Molecular Function: catalytic activity (GO:0003824);;	K15397|4.88126e-36|ppp:PHYPADRAFT_205914|K15397 3-ketoacyl-CoA synthase [EC:2.3.1.199] | (RefSeq) hypothetical protein	Fatty acid elongation (ko00062)	--	--	FAE1/Type III polyketide synthase-like protein	Probable 3-ketoacyl-CoA synthase 21 OS=Arabidopsis thaliana OX=3702 GN=KCS21 PE=2 SV=1	I	Lipid transport and metabolism	unknown [Picea sitchensis]
Gb_14622	681.824	43607	510.517	43647	522.168	50505	67.1495	8792	77.8618	5441	63.8337	4105	4.84986e-17	3.00807	up	--	--	Cellular Component: cell wall (GO:0005618);; Biological Process: cell wall organization (GO:0071555);;	--	--	--	--	Thaumatin family	Osmotin-like protein (Precursor) OS=Solanum lycopersicum (Tomato) PE=1 SV=1	R	General function prediction only	thaumatin-like protein L1 [Pinus monticola]
Gb_18274	1.30211	279	1.14718	357	1.02889	335	0.111751	54	0.149604	38	0.139743	33	6.9959e-14	3.00242	up	--	--	--	--	--	--	--	BURP domain	Polygalacturonase non-catalytic subunit AroGP2 (Precursor) GN=GP2 OS=Solanum lycopersicum (Tomato) PE=3 SV=1	R	General function prediction only	unknown [Picea sitchensis]
Gb_35647	11.6606	1842	16.1252	3405	16.6189	3970	1.67827	543	1.8794	325	1.8488	294	1.88427e-29	2.99741	up	[O]	Posttranslational modification, protein turnover, chaperones	Molecular Function: peptidase activity (GO:0008233);;	--	--	--	--	Subtilase family;; PA domain;; Peptidase inhibitor I9	Subtilisin-like protease (Precursor) GN=At5g67360 OS=Arabidopsis thaliana (Mouse-ear cress) PE=1 SV=1	O	Posttranslational modification, protein turnover, chaperones	subtilase family protein [Populus trichocarpa]
Gb_01707	4.1468	394	4.51176	573	5.19276	746	0.528666	103	0.501179	52	0.689266	66	3.21433e-19	2.97307	up	[V]	Defense mechanisms	Biological Process: regulation of animal organ formation (GO:0003156);; Biological Process: drug transmembrane transport (GO:0006855);; Molecular Function: drug transmembrane transporter activity (GO:0015238);; Molecular Function: antiporter activity (GO:0015297);; Cellular Component: membrane (GO:0016020);; Cellular Component: Golgi transport complex (GO:0017119);; Biological Process: iron ion h…	K03327|0|smo:SELMODRAFT_63250|K03327 multidrug resistance protein, MATE family | (RefSeq) hypothetical protein	--	[R]	General function prediction only	MatE	MATE efflux family protein 5 GN=F3L12.12 OS=Arabidopsis thaliana (Mouse-ear cress) PE=3 SV=1	S	Function unknown	hypothetical protein SELMODRAFT_63250, partial [Selaginella moellendorffii]
Gb_18250	1.6493	144	2.12794	258	1.95814	265	0.299669	57	0.147341	16	0.215166	21	1.87621e-10	2.96871	up	[R]	General function prediction only	Cellular Component: nucleus (GO:0005634);; Cellular Component: cytosol (GO:0005829);; Molecular Function: protein homodimerization activity (GO:0042803);;	K06966|1.78265e-109|pda:103719490|K06966 uncharacterized protein | (RefSeq) cytokinin riboside 5'-monophosphate phosphoribohydrolase LOG8-like	--	--	--	Possible lysine decarboxylase	Cytokinin riboside 5&apos;-monophosphate phosphoribohydrolase LOG8 GN=LOG8 OS=Arabidopsis thaliana (Mouse-ear cress) PE=1 SV=1	S	Function unknown	PREDICTED: cytokinin riboside 5&apos;-monophosphate phosphoribohydrolase LOG8 [Elaeis guineensis]
Gb_39263	3.18043	589	3.67834	841	3.30022	925	0.40769	155	0.483956	93	0.366881	69	4.33008e-23	2.95963	up	--	--	--	K01301|0|smo:SELMODRAFT_134963|K01301 N-acetylated-alpha-linked acidic dipeptidase [EC:3.4.17.21] | (RefSeq) AMP1A-2; hypothetical protein	--	[OPR]	Posttranslational modification, protein turnover, chaperones;; Inorganic ion transport and metabolism;; General function prediction only	Peptidase family M28;; Transferrin receptor-like dimerisation domain;; Peptidase family M20/M25/M40;; PA domain	Probable glutamate carboxypeptidase 2 GN=AMP1 OS=Arabidopsis thaliana (Mouse-ear cress) PE=1 SV=3	OP	Posttranslational modification, protein turnover, chaperones;; Inorganic ion transport and metabolism	hypothetical protein SELMODRAFT_134963 [Selaginella moellendorffii]
Gb_29283	1.37761	177	0.923754	169	1.17468	238	0.099192	14	0.116941	18	0.260591	36	2.72312e-11	2.9507	up	--	--	--	K12616|2.14478e-35|pda:103696209|K12616 enhancer of mRNA-decapping protein 4 | (RefSeq) enhancer of mRNA-decapping protein 4-like	RNA degradation (ko03018)	[R]	General function prediction only	--	Enhancer of mRNA-decapping protein 4 GN=MDC11.13 OS=Arabidopsis thaliana (Mouse-ear cress) PE=1 SV=1	R	General function prediction only	PREDICTED: enhancer of mRNA-decapping protein 4-like [Phoenix dactylifera]
Gb_41465	1.78743	224	1.74033	295	1.54656	295	0.238165	56	0.36483	18	0.249074	38	5.79723e-12	2.93931	up	--	--	--	--	--	--	--	--	MEPFL1 {ECO:0000305} (Precursor) GN=F18D22.80 OS=Arabidopsis thaliana (Mouse-ear cress) PE=1 SV=1	R	General function prediction only	hypothetical protein PHAVU_009G113100g [Phaseolus vulgaris]
Gb_36284	24.2999	2183	19.9149	2403	19.6442	2656	2.37	436	3.38528	336	2.39201	218	2.15442e-26	2.93173	up	--	--	Biological Process: cellular process (GO:0009987);;	--	--	--	--	GDSL/SGNH-like Acyl-Esterase family found in Pmr5 and Cas1p;; PMR5 N terminal Domain	Protein trichome birefringence-like 1 GN=TBL1 OS=Arabidopsis thaliana (Mouse-ear cress) PE=2 SV=1	S	Function unknown	PREDICTED: protein trichome birefringence-like [Musa acuminata subsp. malaccensis]
Gb_18237	0.780763	86	1.03351	151	1.05941	176	0.134673	31	0.199198	24	0.018203	3	2.60463e-08	2.92894	up	[R]	General function prediction only	Molecular Function: lyase activity (GO:0016829);;	K06966|8.77398e-118|pda:103719490|K06966 uncharacterized protein | (RefSeq) cytokinin riboside 5'-monophosphate phosphoribohydrolase LOG8-like	--	--	--	Possible lysine decarboxylase	Probable cytokinin riboside 5&apos;-monophosphate phosphoribohydrolase LOGL2 GN=OsJ_07599 OS=Oryza sativa subsp. japonica (Rice) PE=3 SV=1	S	Function unknown	PREDICTED: cytokinin riboside 5&apos;-monophosphate phosphoribohydrolase LOG8 [Elaeis guineensis]
Gb_10830	22.1957	1329	19.8144	1672	16.2121	1548	2.55778	324	3.04015	209	1.84784	118	3.70644e-24	2.9155	up	[E]	Amino acid transport and metabolism	--	K01592|1.97717e-87|cit:102609487|K01592 tyrosine decarboxylase [EC:4.1.1.25] | (RefSeq) tyrosine decarboxylase 1	Tyrosine metabolism (ko00350);; Isoquinoline alkaloid biosynthesis (ko00950)	[E]	Amino acid transport and metabolism	Pyridoxal-dependent decarboxylase conserved domain	Tyrosine decarboxylase 1 GN=ELI5 OS=Arabidopsis thaliana (Mouse-ear cress) PE=2 SV=1	E	Amino acid transport and metabolism	BnaA09g52950D [Brassica napus]
Gb_36391	3.37984	266	3.37798	362	2.76687	328	0.247059	40	0.3531	32	0.642089	50	7.203e-14	2.91499	up	--	--	Molecular Function: peroxidase activity (GO:0004601);; Molecular Function: binding (GO:0005488);; Cellular Component: extracellular region (GO:0005576);;	--	--	--	--	Peroxidase	Peroxidase 43 (Precursor) OS=Arabidopsis thaliana (Mouse-ear cress) PE=3 SV=2	G	Carbohydrate transport and metabolism	hypothetical protein AMTR_s00071p00084310 [Amborella trichopoda]
Gb_38532	2.53538	224	1.87918	222	1.67061	223	0.188371	35	0.282084	28	0.312234	28	3.10331e-10	2.90905	up	--	--	--	--	--	--	--	--	--	--	--	--
Gb_18871	0.89143	83	1.09628	99	0.753995	74	0.025896	6	0.041056	5	0.175557	20	1.47218e-07	2.90492	up	[T]	Signal transduction mechanisms	Molecular Function: voltage-gated potassium channel activity (GO:0005249);; Biological Process: potassium ion transport (GO:0006813);; Cellular Component: membrane (GO:0016020);; Biological Process: transmembrane transport (GO:0055085);;	--	--	[PT]	Inorganic ion transport and metabolism;; Signal transduction mechanisms	Domain of unknown function (DUF3354);; Cyclic nucleotide-binding domain	Potassium channel KAT2 OS=Oryza sativa subsp. japonica (Rice) PE=2 SV=2	P	Inorganic ion transport and metabolism	unknown [Picea sitchensis]
Gb_30265	18.8838	1430	15.377	1523	15.6902	1755	2.02046	308	2.67042	219	1.85553	139	8.1499e-24	2.90116	up	[RTKL]	General function prediction only;; Signal transduction mechanisms;; Transcription;; Replication, recombination and repair	Molecular Function: protein serine/threonine kinase activity (GO:0004674);; Biological Process: protein autophosphorylation (GO:0046777);;	--	--	[R]	General function prediction only	Protein kinase domain;; Protein tyrosine kinase;; Kinase-like	Serine/threonine-protein kinase OXI1 GN=At3g25250 OS=Arabidopsis thaliana (Mouse-ear cress) PE=1 SV=1	T	Signal transduction mechanisms	hypothetical protein SELMODRAFT_22946, partial [Selaginella moellendorffii]
Gb_40750	1.31789	149	0.733252	111	0.902898	154	0.16156	38	0.132195	17	0.08467	10	1.16132e-05	2.88722	up	[RTKL]	General function prediction only;; Signal transduction mechanisms;; Transcription;; Replication, recombination and repair	Molecular Function: transferase activity, transferring phosphorus-containing groups (GO:0016772);;	--	--	[T]	Signal transduction mechanisms	Protein kinase domain;; Protein tyrosine kinase	Probable LRR receptor-like serine/threonine-protein kinase RKF3 (Precursor) GN=T9J23.16 OS=Arabidopsis thaliana (Mouse-ear cress) PE=2 SV=1	T	Signal transduction mechanisms	predicted protein [Physcomitrella patens]
Gb_02732	18.2643	1370	23.6214	2358	18.1574	2052	3.01305	462	2.19137	180	2.8285	212	8.3638e-28	2.8623	up	--	--	--	--	--	--	--	X8 domain	PLASMODESMATA CALLOSE-BINDING PROTEIN 3 (Precursor) GN=PDCB3 OS=Arabidopsis thaliana (Mouse-ear cress) PE=1 SV=1	S	Function unknown	conserved hypothetical protein [Ricinus communis]
Gb_05697	53.1199	6167	39.4629	6156	31.5538	5592	5.03867	1218	6.39231	822	5.19619	631	6.86217e-08	2.84882	up	[G]	Carbohydrate transport and metabolism	Biological Process: metabolic process (GO:0008152);; Molecular Function: hydrolase activity, acting on glycosyl bonds (GO:0016798);;	K01188|0|cam:101513528|K01188 beta-glucosidase [EC:3.2.1.21] | (RefSeq) beta-glucosidase 12-like	Cyanoamino acid metabolism (ko00460);; Starch and sucrose metabolism (ko00500);; Phenylpropanoid biosynthesis (ko00940)	[G]	Carbohydrate transport and metabolism	Glycosyl hydrolase family 1	Beta-glucosidase 24 (Precursor) OS=Oryza sativa subsp. japonica (Rice) PE=2 SV=1	G	Carbohydrate transport and metabolism	glycosylhydrolase 1 [Leucaena leucocephala]
Gb_12909	22.7562	931	18.7101	1023	16.0695	994	2.47718	208	2.44917	110	2.90085	120	1.12263e-14	2.84402	up	--	--	--	--	--	--	--	Gibberellin regulated protein	Protein GAST1 (Precursor) GN=GAST1 OS=Solanum lycopersicum (Tomato) PE=2 SV=1	R	General function prediction only	unknown [Picea sitchensis]
Gb_21979	3.96365	228	3.97749	305	5.21877	453	0.630689	74	0.575115	36	0.574192	34	1.29001e-12	2.8366	up	--	--	--	--	--	--	--	--	--	S	Function unknown	unknown [Picea sitchensis]
Gb_31940	1.65621	282	1.86429	424	1.53242	395	0.3203	112	0.166968	32	0.191842	33	1.53301e-12	2.83591	up	--	--	--	--	--	[P]	Inorganic ion transport and metabolism	HCO3- transporter family	Probable boron transporter 6 GN=BOR6 OS=Arabidopsis thaliana (Mouse-ear cress) PE=2 SV=2	P	Inorganic ion transport and metabolism	HCO3 transporter [Emiliania huxleyi CCMP1516]
Gb_34121	15.2472	977	14.7025	1259	14.9953	1452	2.29938	302	1.92988	135	1.90549	123	1.00724e-28	2.8338	up	--	--	Cellular Component: extracellular region (GO:0005576);; Biological Process: plant-type cell wall organization (GO:0009664);; Cellular Component: membrane (GO:0016020);;	--	--	--	--	Pollen allergen;; Rare lipoprotein A (RlpA)-like double-psi beta-barrel	Expansin-A4 (Precursor) GN=F17A14.7 OS=Arabidopsis thaliana (Mouse-ear cress) PE=1 SV=1	R	General function prediction only	expansin 2 [Cunninghamia lanceolata]
Gb_34428	4.12398	246	15.1822	1209	9.71326	875	1.47357	180	2.48116	162	0	0	0.00987879	2.81675	up	--	--	--	--	--	--	--	BURP domain	BURP domain-containing protein 12 (Precursor) GN=P0709D11.28 OS=Oryza sativa subsp. japonica (Rice) PE=2 SV=1	R	General function prediction only	PREDICTED: polygalacturonase non-catalytic subunit AroGP2-like [Eucalyptus grandis]
Gb_04347	1.56473	93	0.829936	68	0.904855	82	0.155451	18	0.17362	10	0.281612	10	0.000155146	2.80586	up	--	--	--	--	--	--	--	--	--	--	--	--
Gb_07887	11.7038	632	8.05106	581	9.30132	759	1.20902	134	1.73267	103	1.15273	63	1.11583e-12	2.79066	up	--	--	--	--	--	--	--	Alpha/beta hydrolase family;; Alpha/beta hydrolase family;; alpha/beta hydrolase fold;; PGAP1-like protein	Putative methylesterase 13, chloroplastic (Precursor) GN=MES13 OS=Arabidopsis thaliana (Mouse-ear cress) PE=2 SV=1	R	General function prediction only	unknown [Picea sitchensis]
Gb_32045	3.91034	270	3.69869	318	4.25546	431	0.878677	107	0.363255	29	0.476965	33	1.09902e-11	2.78321	up	--	--	--	--	--	--	--	--	--	S	Function unknown	hypothetical protein SELMODRAFT_5289, partial [Selaginella moellendorffii]
Gb_25335	34.5237	954	33.9468	1253	31.5638	1318	5.01488	284	3.85728	117	5.31137	148	2.162e-27	2.77924	up	[C]	Energy production and conversion	Molecular Function: electron carrier activity (GO:0009055);; Cellular Component: chloroplast stroma (GO:0009570);; Biological Process: response to blue light (GO:0009637);; Biological Process: response to high light intensity (GO:0009644);; Biological Process: response to sucrose (GO:0009744);; Biological Process: photosynthetic electron transport in photosystem I (GO:0009773);; Biological Proces…	K02639|6.42538e-54|mus:103983643|K02639 ferredoxin | (RefSeq) ferredoxin, leaf L-A-like	Photosynthesis (ko00195)	--	--	2Fe-2S iron-sulfur cluster binding domain	Ferredoxin-2, chloroplastic (Precursor) GN=T7P1.9 OS=Arabidopsis thaliana (Mouse-ear cress) PE=1 SV=1	C	Energy production and conversion	unknown [Picea sitchensis]
Gb_41753	0.344379	51	2.36555	468	2.04207	457	0.257464	78	0.161352	27	0.237155	36	0.0306554	2.77595	up	--	--	--	--	--	[R]	General function prediction only	PPR repeat;; PPR repeat family;; PPR repeat;; Pentatricopeptide repeat domain;; Tetratricopeptide repeat;; Tetratricopeptide repeat;; Anaphase-promoting complex, cyclosome, subunit 3;; Region in Clathrin and VPS;; Tetratricopeptide repeat;; 26S proteasome subunit RPN7;; Vacuolar sorting protein 39 domain 1;; Tetratricopeptide repeat;; Mitochondrial ATPase expression;; Protein of unknown function …	Pentatricopeptide repeat-containing protein At4g02750 GN=PCMP-H24 OS=Arabidopsis thaliana (Mouse-ear cress) PE=3 SV=1	R	General function prediction only	PREDICTED: pentatricopeptide repeat-containing protein At4g13650 [Elaeis guineensis]
Gb_00965	8.51141	756	9.51293	1130	9.23247	1240	1.55932	284	1.20899	118	1.10054	99	1.91442e-24	2.76841	up	--	--	Biological Process: polysaccharide biosynthetic process (GO:0000271);; Cellular Component: integral component of plasma membrane (GO:0005887);; Cellular Component: cell cortex (GO:0005938);; Biological Process: water transport (GO:0006833);; Biological Process: pattern specification process (GO:0007389);; Biological Process: regulation of cell size (GO:0008361);; Biological Process: response to s…	--	--	--	--	EamA-like transporter family	Auxin-induced protein 5NG4 OS=Pinus taeda (Loblolly pine) PE=2 SV=1	S	Function unknown	RecName: Full=Auxin-induced protein 5NG4 [Pinus taeda]
Gb_39137	0.722366	80	1.39544	161	0.61374	113	0.048657	16	0.177105	25	0.050123	9	8.64619e-08	2.76733	up	[V]	Defense mechanisms	Molecular Function: nucleotide binding (GO:0000166);; Biological Process: transport (GO:0006810);; Biological Process: cellular process (GO:0009987);; Cellular Component: membrane (GO:0016020);; Cellular Component: cytoplasmic vesicle (GO:0016023);; Molecular Function: ATPase activity (GO:0016887);;	--	--	[Q]	Secondary metabolites biosynthesis, transport and catabolism	ABC transporter transmembrane region;; ABC transporter	ABC transporter C family member 10 GN=F17J16.190 OS=Arabidopsis thaliana (Mouse-ear cress) PE=2 SV=2	Q	Secondary metabolites biosynthesis, transport and catabolism	PREDICTED: ABC transporter C family member 10-like [Nelumbo nucifera]
Gb_21101	579.765	15806	653.218	23806	567.395	23393	108.626	6063	80.8913	2410	68.7436	1885	1.64424e-58	2.75889	up	--	--	--	--	--	--	--	--	--	--	--	--
Gb_14881	1.35835	159	0.875601	137	1.88299	333	0.238864	58	0.074091	10	0.271331	32	2.95883e-05	2.75515	up	--	--	Molecular Function: transferase activity, transferring glycosyl groups (GO:0016757);;	--	--	[GC]	Carbohydrate transport and metabolism;; Energy production and conversion	UDP-glucoronosyl and UDP-glucosyl transferase	UDP-glycosyltransferase 86A1 GN=UGT86A1 OS=Arabidopsis thaliana (Mouse-ear cress) PE=2 SV=1	S	Function unknown	unknown [Picea sitchensis]
Gb_11710	38.5831	1192	78.3957	3237	65.2031	3046	9.83019	622	10.4851	354	5.85117	182	8.97935e-07	2.75048	up	--	--	--	--	--	--	--	Starch binding domain	--	R	General function prediction only	unknown [Picea sitchensis]
Gb_22550	30.0837	2451	26.3599	2870	23.966	2952	3.69983	617	4.31019	384	3.7208	305	2.09096e-27	2.74614	up	--	--	--	--	--	[O]	Posttranslational modification, protein turnover, chaperones	--	Monothiol glutaredoxin-S16, chloroplastic (Precursor) GN=GRXS16 OS=Arabidopsis thaliana (Mouse-ear cress) PE=1 SV=2	S	Function unknown	hypothetical protein SELMODRAFT_410819 [Selaginella moellendorffii]
Gb_29220	16.0946	975	12.1638	985	12.1498	1113	2.06021	256	2.03483	135	1.92033	117	1.75876e-14	2.71524	up	--	--	Molecular Function: DNA binding (GO:0003677);; Molecular Function: transcription factor activity, sequence-specific DNA binding (GO:0003700);; Cellular Component: nucleus (GO:0005634);; Biological Process: regulation of transcription, DNA-templated (GO:0006355);;	K09286|6.18211e-31|smo:SELMODRAFT_68470|K09286 EREBP-like factor | (RefSeq) hypothetical protein	--	--	--	AP2 domain	Pathogenesis-related genes transcriptional activator PTI5 GN=PTI5 OS=Solanum lycopersicum (Tomato) PE=2 SV=1	K	Transcription	hypothetical protein SELMODRAFT_68470, partial [Selaginella moellendorffii]
Gb_39809	9.68082	931	9.16603	1173	5.14048	738	0.880569	179	1.41476	153	1.22941	118	6.37345e-06	2.71457	up	--	--	--	--	--	[S]	Function unknown	PQ loop repeat;; PQ loop repeat	--	S	Function unknown	PREDICTED: lysosomal amino acid transporter 1 homolog [Eucalyptus grandis]
Gb_24161	4.01109	239	14.7772	1176	9.2882	837	1.04156	127	2.31143	151	0.805553	49	0.00812483	2.70435	up	--	--	--	--	--	--	--	BURP domain	BURP domain-containing protein 12 (Precursor) GN=P0709D11.28 OS=Oryza sativa subsp. japonica (Rice) PE=2 SV=1	R	General function prediction only	PREDICTED: polygalacturonase non-catalytic subunit AroGP2-like [Eucalyptus grandis]
Gb_32549	6.51421	1184	6.16428	1499	6.21363	1707	0.758154	282	0.965194	192	1.12793	207	6.68852e-32	2.69715	up	--	--	Molecular Function: DNA binding (GO:0003677);; Biological Process: regulation of transcription, DNA-templated (GO:0006355);;	--	--	--	--	No apical meristem (NAM) protein	Protein CUP-SHAPED COTYLEDON 2 GN=K19P17.12 OS=Arabidopsis thaliana (Mouse-ear cress) PE=1 SV=1	K	Transcription	cup-shaped cotyledon [Picea abies]
Gb_22933	5.03312	524	5.64999	838	4.60943	794	0.847781	188	0.593536	60	0.934555	106	1.09349e-18	2.69585	up	--	--	--	--	--	--	--	Glycosyl hydrolase family 9	Endoglucanase 16 (Precursor) GN=At3g43860 OS=Arabidopsis thaliana (Mouse-ear cress) PE=2 SV=1	G	Carbohydrate transport and metabolism	hypothetical protein AMTR_s00024p00234390 [Amborella trichopoda]
Gb_35747	2.01904	195	1.59752	206	1.64682	240	0.213784	43	0.271057	29	0.300825	30	1.62916e-09	2.68861	up	[V]	Defense mechanisms	Biological Process: regulation of animal organ formation (GO:0003156);; Biological Process: drug transmembrane transport (GO:0006855);; Molecular Function: drug transmembrane transporter activity (GO:0015238);; Molecular Function: antiporter activity (GO:0015297);; Cellular Component: membrane (GO:0016020);; Cellular Component: Golgi transport complex (GO:0017119);; Biological Process: iron ion h…	--	--	[R]	General function prediction only	MatE	MATE efflux family protein DTX1 GN=F3L12.13 OS=Arabidopsis thaliana (Mouse-ear cress) PE=2 SV=1	R	General function prediction only	multidrug resistance pump, putative [Ricinus communis]
Gb_04836	6.4988	1500	6.13394	1892	6.12577	2138	0.913933	432	1.1235	284	0.805618	187	4.19386e-35	2.68675	up	[V]	Defense mechanisms	Biological Process: regulation of animal organ formation (GO:0003156);; Biological Process: drug transmembrane transport (GO:0006855);; Molecular Function: drug transmembrane transporter activity (GO:0015238);; Molecular Function: antiporter activity (GO:0015297);; Cellular Component: membrane (GO:0016020);; Cellular Component: Golgi transport complex (GO:0017119);; Biological Process: iron ion h…	--	--	[R]	General function prediction only	MatE	MATE efflux family protein 9 GN=F3L12.7 OS=Arabidopsis thaliana (Mouse-ear cress) PE=2 SV=1	R	General function prediction only	multidrug resistance pump, putative [Ricinus communis]
Gb_31132	3.64036	716	3.26452	855	3.28208	945	0.384631	190	0.536819	133	0.358417	87	4.72281e-21	2.6865	up	--	--	Molecular Function: DNA binding (GO:0003677);; Cellular Component: nucleus (GO:0005634);; Biological Process: regulation of transcription, DNA-templated (GO:0006355);; Biological Process: response to hormone (GO:0009725);; Molecular Function: protein dimerization activity (GO:0046983);;	--	--	--	--	Auxin response factor;; AUX/IAA family;; B3 DNA binding domain	Auxin response factor 4 GN=ARF4 OS=Arabidopsis thaliana (Mouse-ear cress) PE=1 SV=1	K	Transcription	ARF-L2 protein [Ginkgo biloba]
Gb_20119	9.18449	930	8.54038	1146	9.15322	1409	1.3964	285	1.40917	156	1.40758	131	5.39567e-26	2.68644	up	[E]	Amino acid transport and metabolism	Molecular Function: spermidine synthase activity (GO:0004766);; Biological Process: metabolic process (GO:0008152);;	--	--	[E]	Amino acid transport and metabolism	Spermine/spermidine synthase	Thermospermine synthase ACAULIS5 GN=T20D1.50 OS=Arabidopsis thaliana (Mouse-ear cress) PE=1 SV=1	E	Amino acid transport and metabolism	PREDICTED: thermospermine synthase ACAULIS5-like [Nelumbo nucifera]
Gb_21895	27.0881	753	24.91	926	19.4062	816	4.05316	231	3.91214	119	2.8931	81	8.03171e-15	2.68136	up	--	--	Biological Process: defense response (GO:0006952);; Biological Process: response to biotic stimulus (GO:0009607);;	--	--	--	--	Pathogenesis-related protein Bet v I family;; Polyketide cyclase / dehydrase and lipid transport	Pathogenesis-related protein 1 GN=PR1 OS=Asparagus officinalis (Garden asparagus) PE=2 SV=1	S	Function unknown	unknown [Picea sitchensis]
Gb_22347	14.9402	436	10.3841	405	11.3659	502	1.93802	116	2.53762	81	1.12418	33	1.38901e-10	2.67845	up	--	--	--	K14686|5.15118e-11|cam:101488638|K14686 solute carrier family 31 (copper transporter), member 1 | (RefSeq) copper transporter 5-like	--	[P]	Inorganic ion transport and metabolism	Ctr copper transporter family	Copper transporter 6 GN=COPT6 OS=Arabidopsis thaliana (Mouse-ear cress) PE=2 SV=1	P	Inorganic ion transport and metabolism	unknown [Picea sitchensis]
Gb_07970	38.5226	3171	27.9623	3077	20.1911	2514	4.96466	837	4.75134	428	3.75953	312	4.56072e-05	2.65526	up	--	--	--	--	--	--	--	D-mannose binding lectin;; PAN-like domain	Epidermis-specific secreted glycoprotein EP1 (Precursor) GN=EP1 OS=Daucus carota (Wild carrot) PE=1 SV=1	R	General function prediction only	unknown [Picea sitchensis]
Gb_30861	9.26612	496	8.29922	594	7.24454	587	1.27341	140	1.55057	91	1.02029	55	1.53334e-15	2.65467	up	--	--	--	--	--	--	--	Wall-associated receptor kinase galacturonan-binding;; Wall-associated receptor kinase C-terminal	--	R	General function prediction only	unknown [Picea sitchensis]
Gb_23562	6.09866	413	5.24393	475	5.18315	531	1.13701	158	0.814049	61	0.58312	40	3.63854e-13	2.65424	up	--	--	--	--	--	--	--	Dof domain, zinc finger	Dof zinc finger protein DOF2.4 GN=DOF2.4 OS=Arabidopsis thaliana (Mouse-ear cress) PE=2 SV=1	R	General function prediction only	Dof1 [Pinus pinaster]
Gb_09965	10.0164	1133	5.95453	900	9.82572	1680	1.85424	414	1.12832	140	1.05912	121	2.31308e-07	2.65281	up	--	--	--	--	--	[T]	Signal transduction mechanisms	Eukaryotic cytochrome b561	Cytochrome b561 domain-containing protein At4g18260 (Precursor) GN=At4g18260 OS=Arabidopsis thaliana (Mouse-ear cress) PE=2 SV=1	T	Signal transduction mechanisms	PREDICTED: cytochrome b561 domain-containing protein At2g30890-like [Elaeis guineensis]
NG_658	3.35404	215	4.48042	384	3.92524	380	0.414401	55	0.829185	58	0.586325	38	3.94219e-12	2.64753	up	--	--	--	--	--	--	--	Lateral organ boundaries (LOB) domain	LOB domain-containing protein 11 OS=Arabidopsis thaliana OX=3702 GN=LBD11 PE=2 SV=2	S	Function unknown	unknown [Picea sitchensis]
Gb_28254	8.26887	373	6.4265	387	6.71112	481	1.30887	128	0.814167	41	1.16838	53	2.09692e-12	2.64567	up	[R]	General function prediction only	Molecular Function: O-methyltransferase activity (GO:0008171);; Biological Process: methylation (GO:0032259);;	K00545|2.38831e-64|smo:SELMODRAFT_110441|K00545 catechol O-methyltransferase [EC:2.1.1.6] | (RefSeq) hypothetical protein	Tyrosine metabolism (ko00350);; Betalain biosynthesis (ko00965)	[Q]	Secondary metabolites biosynthesis, transport and catabolism	O-methyltransferase;; Methyltransferase domain;; Methyltransferase domain	--	Q	Secondary metabolites biosynthesis, transport and catabolism	unknown [Picea sitchensis]
Gb_01768	0.543722	96	0.47134	111	0.586936	156	0.107565	39	0.067117	13	0.072225	13	1.34858e-06	2.64219	up	--	--	--	--	--	--	--	B3 DNA binding domain	B3 domain-containing transcription factor ABI3 GN=ABI3 OS=Arabidopsis thaliana (Mouse-ear cress) PE=1 SV=1	K	Transcription	transcription factor viviparous 1 [Picea abies]
NG_10703	10.722	1423	12.3117	2063	12.0136	2411	1.90386	518	1.93012	280	1.62248	204	6.49677e-35	2.64003	up	--	--	Cellular Component: nucleus (GO:0005634);; Biological Process: stomatal complex development (GO:0010374);; Molecular Function: protein dimerization activity (GO:0046983);;	K20558|6.75424e-71|atr:18437056|K20558 transcription factor SPEECHLESS | (RefSeq) transcription factor SPEECHLESS	--	--	--	Helix-loop-helix DNA-binding domain	Transcription factor SPEECHLESS OS=Arabidopsis thaliana OX=3702 GN=SPCH PE=1 SV=1	K	Transcription	transcription factor SPCH, partial [Picea breweriana]
Gb_30276	1.29504	190	0.964834	213	0.670758	156	0.164163	56	0.088969	17	0.172711	29	1.08307e-05	2.628	up	[M]	Cell wall/membrane/envelope biogenesis	Biological Process: polysaccharide metabolic process (GO:0005976);; Molecular Function: transferase activity, transferring glycosyl groups (GO:0016757);; Biological Process: cell wall biogenesis (GO:0042546);; Biological Process: cell wall macromolecule metabolic process (GO:0044036);;	K10999|0|vvi:100248512|K10999 cellulose synthase A [EC:2.4.1.12] | (RefSeq) cellulose synthase A catalytic subunit 7 [UDP-forming]	--	--	--	Cellulose synthase	Cellulose synthase A catalytic subunit 9 [UDP-forming] OS=Oryza sativa subsp. japonica (Rice) PE=2 SV=1	O	Posttranslational modification, protein turnover, chaperones	PREDICTED: cellulose synthase A catalytic subunit 9 [UDP-forming] isoform X2 [Elaeis guineensis]
Gb_04597	116.795	6268	97.8484	7019	89.7215	7282	17.3754	1909	17.0612	1001	14.3064	772	6.08297e-19	2.6096	up	[G]	Carbohydrate transport and metabolism	Molecular Function: hydrolase activity, hydrolyzing O-glycosyl compounds (GO:0004553);; Cellular Component: cell wall (GO:0005618);; Biological Process: cellular glucan metabolic process (GO:0006073);; Molecular Function: xyloglucan:xyloglucosyl transferase activity (GO:0016762);; Cellular Component: apoplast (GO:0048046);;	K08235|4.65815e-113|pop:POPTR_0019s14590g|K08235 xyloglucan:xyloglucosyl transferase [EC:2.4.1.207] | (RefSeq) POPTRDRAFT_915608; Xyloglucan endotransglucosylase/hydrolase protein 9 precursor	--	--	--	Glycosyl hydrolases family 16;; Xyloglucan endo-transglycosylase (XET) C-terminus	Xyloglucan endotransglucosylase/hydrolase protein 9 (Precursor) GN=F4C21.14 OS=Arabidopsis thaliana (Mouse-ear cress) PE=2 SV=2	R	General function prediction only	unknown [Picea sitchensis]
Gb_14470	1.10159	172	1.3853	285	2.19561	516	0.103199	34	0.398107	68	0.23986	38	3.61536e-06	2.60775	up	--	--	Molecular Function: DNA binding (GO:0003677);;	--	--	[K]	Transcription	KNOX2 domain;; KNOX1 domain	Homeotic protein knotted-1 GN=KN1 OS=Solanum lycopersicum (Tomato) PE=2 SV=1	K	Transcription	KNOTTED1-like homeodomain protein 3 [Picea abies]
Gb_06796	7.44991	366	5.3262	349	3.9382	292	0.702912	71	1.25916	68	0.723197	36	4.11459e-05	2.60716	up	--	--	Molecular Function: methyltransferase activity (GO:0008168);; Biological Process: methylation (GO:0032259);;	K12502|4.05063e-109|pmum:103323966|K12502 MPBQ/MSBQ methyltransferase [EC:2.1.1.295] | (RefSeq) 2-methyl-6-phytyl-1,4-hydroquinone methyltransferase, chloroplastic-like	Ubiquinone and other terpenoid-quinone biosynthesis (ko00130)	[H]	Coenzyme transport and metabolism	Methyltransferase domain;; ubiE/COQ5 methyltransferase family;; Methyltransferase domain;; Methyltransferase domain;; Methyltransferase domain;; Methyltransferase domain;; Methyltransferase domain	2-methyl-6-phytyl-1,4-hydroquinone methyltransferase, chloroplastic (Precursor) OS=Spinacia oleracea (Spinach) PE=1 SV=1	H	Coenzyme transport and metabolism	PREDICTED: 2-methyl-6-phytyl-1,4-hydroquinone methyltransferase, chloroplastic-like [Prunus mume]
Gb_18238	1.54605	128	0.886898	103	1.02947	142	0.069244	13	0.302569	31	0.141208	14	7.41018e-07	2.60569	up	[R]	General function prediction only	Molecular Function: lyase activity (GO:0016829);;	K06966|2.3625e-33|mus:103978782|K06966 uncharacterized protein | (RefSeq) cytokinin riboside 5'-monophosphate phosphoribohydrolase LOG8 isoform X3	--	--	--	--	Cytokinin riboside 5&apos;-monophosphate phosphoribohydrolase LOG8 GN=LOG8 OS=Arabidopsis thaliana (Mouse-ear cress) PE=1 SV=1	S	Function unknown	PREDICTED: cytokinin riboside 5&apos;-monophosphate phosphoribohydrolase LOG8 [Elaeis guineensis]
NG_178	9.7799	845	7.15702	827	6.27156	820	1.47863	262	1.35797	129	0.895891	78	1.47182e-07	2.59882	up	--	--	--	--	--	--	--	--	--	--	--	--
Gb_32693	10.6596	295	8.76054	324	6.75635	283	1.56475	89	1.09734	34	1.53903	43	1.42734e-08	2.59598	up	--	--	--	--	--	--	--	--	--	S	Function unknown	PREDICTED: uncharacterized protein LOC101501570 [Cicer arietinum]
Gb_00277	2.48391	232	1.65931	207	0.935035	132	0.406253	78	0.138409	15	0.264716	25	0.0101666	2.59572	up	[R]	General function prediction only	--	--	--	[QR]	Secondary metabolites biosynthesis, transport and catabolism;; General function prediction only	non-haem dioxygenase in morphine synthesis N-terminal;; 2OG-Fe(II) oxygenase superfamily	Feruloyl CoA ortho-hydroxylase 2 GN=F6&apos;H2 OS=Arabidopsis thaliana (Mouse-ear cress) PE=1 SV=1	Q	Secondary metabolites biosynthesis, transport and catabolism	PREDICTED: gibberellin 20 oxidase 1-like [Pyrus x bretschneideri]
Gb_21264	3.17177	153	3.4745	224	2.11148	154	0.380972	38	0.584558	31	0.448736	22	3.42229e-08	2.59179	up	[KAD]	Transcription;; RNA processing and modification;; Cell cycle control, cell division, chromosome partitioning	Molecular Function: DNA binding (GO:0003677);; Molecular Function: chromatin binding (GO:0003682);;	K09422|3.76334e-59|pop:POPTR_0001s11100g|K09422 myb proto-oncogene protein, plant | (RefSeq) POPTRDRAFT_640295; hypothetical protein	--	[K]	Transcription	Myb-like DNA-binding domain;; Myb-like DNA-binding domain	Transcription repressor MYB5 GN=MYB5 OS=Arabidopsis thaliana (Mouse-ear cress) PE=1 SV=1	K	Transcription	Transcription repressor [Morus notabilis]
Gb_41546	7.22357	240	5.31207	236	4.14565	209	0.714558	49	1.34867	49	0.631104	22	4.21997e-06	2.59105	up	--	--	--	--	--	--	--	Alpha/beta hydrolase family;; Alpha/beta hydrolase family	Methylesterase 17 GN=MES17 OS=Arabidopsis thaliana (Mouse-ear cress) PE=1 SV=1	R	General function prediction only	unknown [Picea sitchensis]
Gb_26419	2.91319	262	2.47197	297	2.64955	360	0.40341	75	0.492894	49	0.408607	37	1.21373e-10	2.57898	up	--	--	Molecular Function: DNA binding (GO:0003677);; Molecular Function: transcription factor activity, sequence-specific DNA binding (GO:0003700);; Cellular Component: nucleus (GO:0005634);; Biological Process: regulation of transcription, DNA-templated (GO:0006355);; Biological Process: embryonic pattern specification (GO:0009880);; Biological Process: cotyledon development (GO:0048825);; Biological …	--	--	--	--	AP2 domain	Ethylene-responsive transcription factor ESR2 GN=F21J9.25 OS=Arabidopsis thaliana (Mouse-ear cress) PE=1 SV=1	K	Transcription	PREDICTED: ethylene-responsive transcription factor ESR2-like [Eucalyptus grandis]
Gb_13949	15.0754	339	12.6303	379	21.3555	725	2.14136	99	3.87184	95	2.00947	46	3.72447e-09	2.57011	up	--	--	--	--	--	--	--	Late embryogenesis abundant protein	--	S	Function unknown	hypothetical protein SELMODRAFT_406960 [Selaginella moellendorffii]
Gb_34845	7.38902	234	5.74038	243	3.6262	174	0.648383	42	0.971663	34	1.14349	37	7.87722e-05	2.5696	up	--	--	Molecular Function: DNA binding (GO:0003677);; Molecular Function: transcription factor activity, sequence-specific DNA binding (GO:0003700);; Cellular Component: nucleus (GO:0005634);; Biological Process: regulation of transcription, DNA-templated (GO:0006355);; Biological Process: defense response (GO:0006952);;	--	--	--	--	--	Pathogenesis-related genes transcriptional activator PTI5 GN=PTI5 OS=Solanum lycopersicum (Tomato) PE=2 SV=1	K	Transcription	hypothetical protein PHAVU_006G179800g [Phaseolus vulgaris]
Gb_32859	2.12674	155	1.34235	131	1.48995	164	0.27583	42	0.231757	19	0.299133	22	4.98377e-07	2.56817	up	[RTKL]	General function prediction only;; Signal transduction mechanisms;; Transcription;; Replication, recombination and repair	Molecular Function: nucleotide binding (GO:0000166);; Molecular Function: protein serine/threonine kinase activity (GO:0004674);; Biological Process: protein phosphorylation (GO:0006468);;	--	--	[T]	Signal transduction mechanisms	Protein kinase domain;; Protein tyrosine kinase	Mitogen-activated protein kinase kinase kinase 2 GN=ANP2 OS=Arabidopsis thaliana (Mouse-ear cress) PE=2 SV=1	T	Signal transduction mechanisms	predicted protein [Physcomitrella patens]
Gb_34837	15.465	1132	12.3269	1206	12.6128	1396	1.87259	281	2.20228	177	2.61094	193	2.0826e-21	2.56372	up	--	--	Molecular Function: transcription factor activity, sequence-specific DNA binding (GO:0003700);; Molecular Function: binding (GO:0005488);; Cellular Component: nucleus (GO:0005634);;	--	--	[K]	Transcription	GATA zinc finger	GATA transcription factor 20 GN=GATA20 OS=Arabidopsis thaliana (Mouse-ear cress) PE=2 SV=2	K	Transcription	PREDICTED: GATA transcription factor 19-like [Elaeis guineensis]
Gb_26642	59.6173	3417	50.1456	3847	46.6927	4052	9.05096	1065	9.66944	607	7.13516	412	2.34809e-20	2.56212	up	[G]	Carbohydrate transport and metabolism	Molecular Function: hydrolase activity, hydrolyzing O-glycosyl compounds (GO:0004553);; Cellular Component: cell wall (GO:0005618);; Biological Process: cellular glucan metabolic process (GO:0006073);; Molecular Function: xyloglucan:xyloglucosyl transferase activity (GO:0016762);; Cellular Component: apoplast (GO:0048046);;	--	--	--	--	Xyloglucan endo-transglycosylase (XET) C-terminus;; Glycosyl hydrolases family 16;; Glycosyl hydrolases family 16	Xyloglucan endotransglucosylase/hydrolase protein 9 (Precursor) GN=F4C21.14 OS=Arabidopsis thaliana (Mouse-ear cress) PE=2 SV=2	R	General function prediction only	unknown [Picea sitchensis]
Gb_03862	4.36621	312	3.52186	337	2.24451	243	0.498521	73	0.626299	49	0.559707	41	3.22112e-05	2.5567	up	--	--	Biological Process: dephosphorylation (GO:0016311);; Molecular Function: pyrophosphatase activity (GO:0016462);; Molecular Function: phosphatase activity (GO:0016791);;	K13248|9.64596e-56|pda:103699233|K13248 pyridoxal phosphate phosphatase PHOSPHO2 [EC:3.1.3.74] | (RefSeq) inorganic pyrophosphatase 2-like	Vitamin B6 metabolism (ko00750)	[R]	General function prediction only	Putative Phosphatase	Inorganic pyrophosphatase 2 GN=At1g17710 OS=Arabidopsis thaliana (Mouse-ear cress) PE=2 SV=1	R	General function prediction only	unknown [Picea sitchensis]
Gb_17750	36.5907	1307	32.5202	1553	36.311	1962	6.56128	480	6.02814	236	4.82228	174	5.87826e-29	2.55662	up	--	--	--	--	--	--	--	Jacalin-like lectin domain	Jacalin-related lectin 19 GN=JAL19 OS=Arabidopsis thaliana (Mouse-ear cress) PE=2 SV=1	R	General function prediction only	PREDICTED: jacalin-related lectin 3-like isoform X1 [Populus euphratica]
Gb_30390	4.95016	519	3.69445	518	3.24025	514	0.679093	146	0.576532	66	0.740308	78	1.8146e-08	2.5465	up	[E]	Amino acid transport and metabolism	Biological Process: DNA metabolic process (GO:0006259);; Biological Process: proteolysis (GO:0006508);; Molecular Function: metallopeptidase activity (GO:0008237);; Molecular Function: zinc ion binding (GO:0008270);; Biological Process: leukotriene biosynthetic process (GO:0019370);; Biological Process: macromolecule methylation (GO:0043414);; Biological Process: single-organism process (GO:00446…	K01254|0|vvi:100243305|K01254 leukotriene-A4 hydrolase [EC:3.3.2.6] | (RefSeq) leukotriene A-4 hydrolase homolog	Arachidonic acid metabolism (ko00590)	[IOVE]	Lipid transport and metabolism;; Posttranslational modification, protein turnover, chaperones;; Defense mechanisms;; Amino acid transport and metabolism	Peptidase family M1;; Leukotriene A4 hydrolase, C-terminal;; Peptidase MA superfamily	Leukotriene A-4 hydrolase homolog GN=LKHA4 OS=Arabidopsis thaliana (Mouse-ear cress) PE=2 SV=1	EIOV	Amino acid transport and metabolism;; Lipid transport and metabolism;; Posttranslational modification, protein turnover, chaperones;; Defense mechanisms	unknown [Picea sitchensis]
Gb_07056	1.34423	97	1.11596	106	1.2652	133	0.214093	32	0	0	0.389067	29	2.39945e-06	2.54154	up	--	--	--	--	--	--	--	SnoaL-like domain	--	R	General function prediction only	hypothetical protein CISIN_1g023448mg [Citrus sinensis]
Gb_01499	35.9333	1737	37.2028	2418	36.8719	2687	5.90272	588	7.14499	381	5.20083	258	5.75308e-36	2.54115	up	--	--	Cellular Component: extracellular region (GO:0005576);; Biological Process: syncytium formation (GO:0006949);; Cellular Component: plant-type cell wall (GO:0009505);; Biological Process: plant-type cell wall organization (GO:0009664);; Biological Process: response to red light (GO:0010114);; Biological Process: regulation of stomatal movement (GO:0010119);; Cellular Component: membrane (GO:001602…	--	--	--	--	Pollen allergen;; Rare lipoprotein A (RlpA)-like double-psi beta-barrel	Expansin-A1 (Precursor) GN=F10D13_18 OS=Arabidopsis thaliana (Mouse-ear cress) PE=2 SV=1	R	General function prediction only	unknown [Picea sitchensis]
Gb_13244	310.244	5996	211.962	5476	191.093	5585	37.2572	1474	47.68	1007	36.4376	708	1.98227e-06	2.53019	up	--	--	--	--	--	--	--	Hydrophobic seed protein;; Probable lipid transfer	pEARLI1-like lipid transfer protein 1 (Precursor) GN=AZI1 OS=Arabidopsis thaliana (Mouse-ear cress) PE=1 SV=1	R	General function prediction only	unknown [Picea sitchensis]
NG_8878	18.1151	2304	16.6487	2838	15.2724	2976	3.15652	822	2.52152	355	2.78758	356	6.11957e-37	2.53012	up	--	--	--	--	--	--	--	--	--	--	--	--
Gb_32404	14.0448	2264	13.2744	2860	12.3247	3004	2.23326	737	2.10515	371	2.47643	402	1.42613e-37	2.50722	up	--	--	Molecular Function: DNA binding (GO:0003677);; Cellular Component: nucleus (GO:0005634);; Biological Process: regulation of transcription, DNA-templated (GO:0006355);; Biological Process: response to hormone (GO:0009725);; Molecular Function: protein dimerization activity (GO:0046983);;	--	--	--	--	Auxin response factor;; AUX/IAA family;; B3 DNA binding domain	Auxin response factor 3 GN=T1B8.30 OS=Arabidopsis thaliana (Mouse-ear cress) PE=1 SV=2	K	Transcription	ARF-L2 protein [Ginkgo biloba]
Gb_10887	1.34945	111	1.48698	226	1.77241	243	0.318512	50	0.217046	34	0.140404	21	4.65921e-08	2.48692	up	--	--	Molecular Function: transcription factor activity, sequence-specific DNA binding (GO:0003700);; Cellular Component: nucleus (GO:0005634);; Biological Process: regulation of transcription, DNA-templated (GO:0006355);; Molecular Function: sequence-specific DNA binding (GO:0043565);;	--	--	[K]	Transcription	Homeobox KN domain;; ELK domain;; Homeobox domain	Homeobox protein knotted-1-like 2 OS=Malus domestica (Apple) PE=2 SV=1	K	Transcription	homeobox transcription factor KN3 [Pinus strobus]
Gb_26383	14.3888	554	15.1093	778	14.9555	871	2.76735	218	2.47216	104	2.59259	101	1.3909e-16	2.46558	up	--	--	Molecular Function: protein binding (GO:0005515);; Cellular Component: plasma membrane (GO:0005886);; Biological Process: transport (GO:0006810);; Biological Process: response to osmotic stress (GO:0006970);; Biological Process: response to metal ion (GO:0010038);; Biological Process: cell growth (GO:0016049);; Biological Process: regulation of microtubule polymerization or depolymerization (GO:0…	--	--	--	--	DREPP plasma membrane polypeptide	Plasma membrane-associated cation-binding protein 1 GN=F1C12.180 OS=Arabidopsis thaliana (Mouse-ear cress) PE=1 SV=1	R	General function prediction only	PREDICTED: plasma membrane-associated cation-binding protein 1 [Eucalyptus grandis]
Gb_05749	35.4728	3710	38.5674	5391	34.4329	5445	7.19464	1541	6.3156	722	5.65601	595	7.80068e-41	2.46164	up	[Q]	Secondary metabolites biosynthesis, transport and catabolism	Molecular Function: copper ion binding (GO:0005507);; Cellular Component: extracellular region (GO:0005576);; Molecular Function: oxidoreductase activity (GO:0016491);; Biological Process: oxidation-reduction process (GO:0055114);;	K00423|0|mus:103969432|K00423 L-ascorbate oxidase [EC:1.10.3.3] | (RefSeq) L-ascorbate oxidase	Ascorbate and aldarate metabolism (ko00053)	[Q]	Secondary metabolites biosynthesis, transport and catabolism	Multicopper oxidase;; Multicopper oxidase;; Multicopper oxidase	L-ascorbate oxidase (Precursor) GN=AAO OS=Nicotiana tabacum (Common tobacco) PE=2 SV=1	Q	Secondary metabolites biosynthesis, transport and catabolism	unknown [Picea sitchensis]
Gb_03860	5.06454	323	2.92402	248	2.29508	222	0.577174	76	0.652419	47	0.548122	38	0.0039689	2.45412	up	--	--	Biological Process: dephosphorylation (GO:0016311);; Molecular Function: phosphatase activity (GO:0016791);;	K13248|1.91415e-98|pda:103711193|K13248 pyridoxal phosphate phosphatase PHOSPHO2 [EC:3.1.3.74] | (RefSeq) inorganic pyrophosphatase 2	Vitamin B6 metabolism (ko00750)	[R]	General function prediction only	Putative Phosphatase	Inorganic pyrophosphatase 2 GN=At1g17710 OS=Arabidopsis thaliana (Mouse-ear cress) PE=2 SV=1	R	General function prediction only	unknown [Picea sitchensis]
Gb_05457	22.9147	1578	26.3957	2431	23.3861	2435	4.48584	633	4.50285	340	3.92771	272	1.59658e-32	2.45346	up	[E]	Amino acid transport and metabolism	Molecular Function: aromatic-L-amino-acid decarboxylase activity (GO:0004058);; Molecular Function: tyrosine decarboxylase activity (GO:0004837);; Cellular Component: cytoplasm (GO:0005737);; Biological Process: cellular amino acid metabolic process (GO:0006520);; Biological Process: response to wounding (GO:0009611);; Molecular Function: pyridoxal phosphate binding (GO:0030170);;	K01592|4.54505e-113|pmum:103334400|K01592 tyrosine decarboxylase [EC:4.1.1.25] | (RefSeq) tyrosine decarboxylase 1	Tyrosine metabolism (ko00350);; Isoquinoline alkaloid biosynthesis (ko00950)	[E]	Amino acid transport and metabolism	Pyridoxal-dependent decarboxylase conserved domain	Tyrosine decarboxylase 1 OS=Oryza sativa subsp. japonica (Rice) PE=2 SV=1	E	Amino acid transport and metabolism	PREDICTED: tyrosine decarboxylase 1-like isoform X3 [Nelumbo nucifera]
Gb_05751	4.94145	323	5.7043	497	4.78538	472	1.11053	149	0.945765	68	0.665525	44	2.43551e-11	2.45213	up	[Q]	Secondary metabolites biosynthesis, transport and catabolism	Molecular Function: copper ion binding (GO:0005507);; Cellular Component: extracellular region (GO:0005576);; Cellular Component: plant-type cell wall (GO:0009505);; Cellular Component: cytoplasmic vesicle (GO:0016023);; Molecular Function: oxidoreductase activity (GO:0016491);; Biological Process: oxidation-reduction process (GO:0055114);;	K00423|2.04642e-158|obr:102718659|K00423 L-ascorbate oxidase [EC:1.10.3.3] | (RefSeq) L-ascorbate oxidase-like	Ascorbate and aldarate metabolism (ko00053)	[Q]	Secondary metabolites biosynthesis, transport and catabolism	Multicopper oxidase;; Multicopper oxidase;; Multicopper oxidase	L-ascorbate oxidase (Precursor) GN=AAO OS=Nicotiana tabacum (Common tobacco) PE=2 SV=1	Q	Secondary metabolites biosynthesis, transport and catabolism	unknown [Picea sitchensis]
Gb_22201	2.22627	328	3.07213	617	3.88632	890	0.87351	198	0.558019	94	0.44086	61	1.64556e-08	2.45178	up	--	--	Molecular Function: protein dimerization activity (GO:0046983);;	--	--	--	--	Helix-loop-helix DNA-binding domain	Transcription factor bHLH66 GN=F27D4.17 OS=Arabidopsis thaliana (Mouse-ear cress) PE=2 SV=1	K	Transcription	PREDICTED: transcription factor bHLH66 [Nelumbo nucifera]
Gb_00207	3.16789	1004	3.37567	1410	3.80927	1762	0.48726	311	0.800009	279	0.596797	180	1.75341e-26	2.42719	up	[V]	Defense mechanisms	Molecular Function: nucleotide binding (GO:0000166);; Biological Process: transport (GO:0006810);; Biological Process: cellular process (GO:0009987);; Molecular Function: ATPase activity (GO:0016887);;	--	--	[Q]	Secondary metabolites biosynthesis, transport and catabolism	ABC transporter;; ABC transporter transmembrane region;; Miro-like protein;; AAA domain;; P-loop containing region of AAA domain;; 50S ribosome-binding GTPase;; Type II/IV secretion system protein	ABC transporter C family member 5 GN=F20D22.11 OS=Arabidopsis thaliana (Mouse-ear cress) PE=2 SV=2	Q	Secondary metabolites biosynthesis, transport and catabolism	PREDICTED: ABC transporter C family member 3-like isoform X1 [Nelumbo nucifera]
Gb_24340	3.36468	221	3.66962	322	1.82884	182	0.39532	53	0.457257	33	0.766459	51	5.43634e-05	2.4267	up	--	--	--	--	--	--	--	Domain of unknown function (DUF4228)	Uncharacterized protein At1g66480 GN=At1g66480 OS=Arabidopsis thaliana (Mouse-ear cress) PE=2 SV=1	S	Function unknown	unknown [Picea sitchensis]
Gb_41002	36.2105	2987	32.5449	3589	25.9159	3233	6.30899	1066	5.0569	456	5.8555	486	2.83102e-13	2.42573	up	--	--	--	--	--	[GC]	Carbohydrate transport and metabolism;; Energy production and conversion	UDP-glucoronosyl and UDP-glucosyl transferase	7-deoxyloganetin glucosyltransferase GN=UGT85A24 OS=Gardenia jasminoides (Cape jasmine) PE=1 SV=1	CG	Energy production and conversion;; Carbohydrate transport and metabolism	unknown [Picea sitchensis]
Gb_17626	7.55967	1187	8.2694	1840	6.0716	1521	1.40594	474	1.20071	220	1.28556	217	5.32404e-19	2.42479	up	[Q]	Secondary metabolites biosynthesis, transport and catabolism	Cellular Component: extracellular region (GO:0005576);; Biological Process: response to red or far red light (GO:0009639);; Biological Process: abscisic acid metabolic process (GO:0009687);; Molecular Function: (+)-abscisic acid 8'-hydroxylase activity (GO:0010295);; Molecular Function: oxygen binding (GO:0019825);; Molecular Function: metal ion binding (GO:0046872);; Biological Process: release …	K09843|0|brp:103861043|K09843 (+)-abscisic acid 8'-hydroxylase [EC:1.14.13.93] | (RefSeq) abscisic acid 8'-hydroxylase 1	Carotenoid biosynthesis (ko00906)	[QI]	Secondary metabolites biosynthesis, transport and catabolism;; Lipid transport and metabolism	Cytochrome P450	Abscisic acid 8&apos;-hydroxylase 1 GN=CYP707A1 OS=Arabidopsis thaliana (Mouse-ear cress) PE=2 SV=1	Q	Secondary metabolites biosynthesis, transport and catabolism	PREDICTED: abscisic acid 8&apos;-hydroxylase 1 [Brassica rapa]
Gb_04500	9.632	704	9.34525	913	8.64166	993	1.62845	248	2.31683	159	1.50918	107	2.83021e-18	2.41983	up	[IQR]	Lipid transport and metabolism;; Secondary metabolites biosynthesis, transport and catabolism;; General function prediction only	Molecular Function: oxidoreductase activity (GO:0016491);; Biological Process: oxidation-reduction process (GO:0055114);;	--	--	[R]	General function prediction only	Enoyl-(Acyl carrier protein) reductase;; short chain dehydrogenase;; KR domain	Glucose and ribitol dehydrogenase GN=CAISE5 OS=Daucus carota (Wild carrot) PE=2 SV=1	Q	Secondary metabolites biosynthesis, transport and catabolism	unknown [Picea sitchensis]
Gb_34429	5.35094	319	20.0356	1595	12.412	1118	2.35281	287	3.12209	204	1.32208	80	0.0184196	2.41935	up	--	--	--	--	--	--	--	BURP domain	BURP domain-containing protein 12 (Precursor) GN=P0709D11.28 OS=Oryza sativa subsp. japonica (Rice) PE=2 SV=1	R	General function prediction only	PREDICTED: polygalacturonase non-catalytic subunit AroGP2-like [Eucalyptus grandis]
Gb_23431	2.68403	439	2.88449	632	2.80201	693	0.313973	106	0.710178	128	0.500337	83	2.64918e-15	2.41926	up	--	--	--	--	--	--	--	Remorin, C-terminal region	--	S	Function unknown	unknown [Picea sitchensis]
Gb_36860	3.22695	508	3.46107	713	2.77086	632	0.464266	133	0.725653	123	0.678786	93	3.07652e-15	2.40837	up	--	--	--	--	--	--	--	GDP-fucose protein O-fucosyltransferase	Uncharacterized protein At1g04910 GN=At1g04910 OS=Arabidopsis thaliana (Mouse-ear cress) PE=2 SV=1	S	Function unknown	hypothetical protein Csa_3G702070 [Cucumis sativus]
Gb_36094	85.355	6554	70.316	7218	69.2106	8037	11.9786	1883	15.6929	1317	14.0992	1089	8.19938e-22	2.40072	up	--	--	--	--	--	--	--	Universal stress protein family	--	S	Function unknown	hypothetical protein SORBIDRAFT_09g021150 [Sorghum bicolor]
Gb_26673	15.3965	2005	13.8267	2415	14.4701	2845	2.67184	697	2.87995	398	2.89773	352	1.74832e-33	2.39952	up	--	--	Molecular Function: organic cyclic compound binding (GO:0097159);; Molecular Function: heterocyclic compound binding (GO:1901363);;	--	--	--	--	Raffinose synthase or seed imbibition protein Sip1	Probable galactinol--sucrose galactosyltransferase 2 GN=T8H10.120 OS=Arabidopsis thaliana (Mouse-ear cress) PE=2 SV=2	R	General function prediction only	PREDICTED: probable galactinol--sucrose galactosyltransferase 2 [Populus euphratica]
Gb_13335	3.8773	280	4.94106	473	9.43854	1024	1.92175	269	0.839369	67	0.657791	46	0.00586258	2.39357	up	[QR]	Secondary metabolites biosynthesis, transport and catabolism;; General function prediction only	--	--	--	--	--	Thiopurine S-methyltransferase (TPMT);; Methyltransferase domain;; Methyltransferase domain;; Methyltransferase domain;; Methyltransferase domain;; Methyltransferase domain;; Methyltransferase small domain;; CheR methyltransferase, SAM binding domain	Thiocyanate methyltransferase 1 GN=TMT1 OS=Brassica oleracea (Wild cabbage) PE=1 SV=1	R	General function prediction only	PREDICTED: probable thiol methyltransferase 2-like isoform X3 [Citrus sinensis]
Gb_00710	4.79956	420	4.72237	553	4.90387	649	0.925856	166	1.0533	101	0.703703	62	5.77725e-13	2.388	up	--	--	Molecular Function: transferase activity, transferring glycosyl groups (GO:0016757);;	--	--	[GC]	Carbohydrate transport and metabolism;; Energy production and conversion	UDP-glucoronosyl and UDP-glucosyl transferase	UDP-glycosyltransferase 86A1 GN=UGT86A1 OS=Arabidopsis thaliana (Mouse-ear cress) PE=2 SV=1	CG	Energy production and conversion;; Carbohydrate transport and metabolism	unknown [Picea sitchensis]
Gb_00127	3.11966	82	3.46106	121	1.83017	73	0.695815	38	0.430866	13	0.412575	11	6.43467e-05	2.37644	up	--	--	--	--	--	--	--	--	--	--	--	unknown [Picea sitchensis]
Gb_41001	20.1483	1652	16.7168	1834	13.6401	1693	3.76673	633	3.03016	273	2.69898	223	1.82744e-09	2.37377	up	--	--	Molecular Function: transferase activity, transferring glycosyl groups (GO:0016757);;	--	--	[GC]	Carbohydrate transport and metabolism;; Energy production and conversion	UDP-glucoronosyl and UDP-glucosyl transferase	7-deoxyloganetin glucosyltransferase GN=UGT85A23 OS=Catharanthus roseus (Madagascar periwinkle) PE=1 SV=1	CG	Energy production and conversion;; Carbohydrate transport and metabolism	unknown [Picea sitchensis]
Gb_03927	1.26883	268	2.0718	585	2.20576	705	0.219973	96	0	0	0.82725	176	8.18402e-06	2.37243	up	--	--	--	--	--	[R]	General function prediction only	PPR repeat family;; PPR repeat;; PPR repeat;; Pentatricopeptide repeat domain;; DYW family of nucleic acid deaminases;; Tetratricopeptide repeat;; Tetratricopeptide repeat	Pentatricopeptide repeat-containing protein At2g22070 GN=PCMP-H41 OS=Arabidopsis thaliana (Mouse-ear cress) PE=3 SV=1	R	General function prediction only	PREDICTED: pentatricopeptide repeat-containing protein At1g20230 [Nelumbo nucifera]
Gb_25967	98.5136	1564	77.17	1638	70.0295	1682	11.111	362	17.9835	312	17.7631	284	2.18879e-11	2.3677	up	--	--	--	--	--	--	--	--	--	--	--	--
Gb_37298	1.31433	121	1.27479	157	1.27955	178	0.264728	50	0.34406	35	0.110206	11	2.21701e-06	2.36299	up	--	--	Molecular Function: peroxidase activity (GO:0004601);; Cellular Component: vacuole (GO:0005773);; Biological Process: response to oxidative stress (GO:0006979);; Cellular Component: plant-type cell wall (GO:0009505);; Cellular Component: membrane (GO:0016020);; Molecular Function: heme binding (GO:0020037);; Molecular Function: metal ion binding (GO:0046872);; Biological Process: oxidation-reduct…	K00430|9.2036e-149|pop:POPTR_0002s06590g|K00430 peroxidase [EC:1.11.1.7] | (RefSeq) POPTRDRAFT_830144; peroxidase precursor family protein	Phenylpropanoid biosynthesis (ko00940)	--	--	Peroxidase	Peroxidase 12 (Precursor) OS=Arabidopsis thaliana (Mouse-ear cress) PE=1 SV=1	G	Carbohydrate transport and metabolism	peroxidase [Ginkgo biloba]
Gb_32507	2.29681	190	3.07414	329	3.32374	419	0.518767	98	0.672992	57	0.387289	35	2.26524e-09	2.35965	up	[P]	Inorganic ion transport and metabolism	Molecular Function: N,N-dimethylaniline monooxygenase activity (GO:0004499);; Biological Process: brassinosteroid mediated signaling pathway (GO:0009742);; Biological Process: auxin biosynthetic process (GO:0009851);; Molecular Function: flavin adenine dinucleotide binding (GO:0050660);; Molecular Function: NADP binding (GO:0050661);; Biological Process: oxidation-reduction process (GO:0055114);;	--	--	[Q]	Secondary metabolites biosynthesis, transport and catabolism	Flavin-binding monooxygenase-like;; Pyridine nucleotide-disulphide oxidoreductase;; L-lysine 6-monooxygenase (NADPH-requiring);; Pyridine nucleotide-disulphide oxidoreductase;; NAD(P)-binding Rossmann-like domain;; FAD binding domain;; Pyridine nucleotide-disulphide oxidoreductase;; FAD-NAD(P)-binding;; Thi4 family	Probable indole-3-pyruvate monooxygenase YUCCA3 GN=T1G11.14 OS=Arabidopsis thaliana (Mouse-ear cress) PE=2 SV=1	Q	Secondary metabolites biosynthesis, transport and catabolism	hypothetical protein JCGZ_17597 [Jatropha curcas]
Gb_36328	8.26301	725	6.10317	704	6.04891	799	1.35906	235	1.28226	117	1.44987	119	6.4239e-10	2.35837	up	[U]	Intracellular trafficking, secretion, and vesicular transport	Biological Process: rRNA processing (GO:0006364);; Biological Process: proteolysis (GO:0006508);; Molecular Function: serine-type peptidase activity (GO:0008236);; Cellular Component: plastid envelope (GO:0009526);; Cellular Component: chloroplast thylakoid membrane (GO:0009535);; Biological Process: chloroplast relocation (GO:0009902);; Biological Process: thylakoid membrane organization (GO:001…	--	--	[O]	Posttranslational modification, protein turnover, chaperones	Peptidase S24-like;; Signal peptidase, peptidase S26	Chloroplast processing peptidase (Precursor) GN=PLSP1 OS=Arabidopsis thaliana (Mouse-ear cress) PE=2 SV=2	O	Posttranslational modification, protein turnover, chaperones	unknown [Picea sitchensis]
Gb_00031	13.5136	1549	11.6383	1783	11.0972	1923	2.15801	507	2.71182	340	2.03909	236	7.25104e-25	2.35787	up	--	--	Molecular Function: anion transmembrane transporter activity (GO:0008509);; Biological Process: stomatal movement (GO:0010118);; Cellular Component: endomembrane system (GO:0012505);;	--	--	[R]	General function prediction only	Aluminium activated malate transporter;; Fusaric acid resistance protein-like	Aluminum-activated malate transporter 12 GN=T6K21.150 OS=Arabidopsis thaliana (Mouse-ear cress) PE=2 SV=1	P	Inorganic ion transport and metabolism	PREDICTED: aluminum-activated malate transporter 12-like [Tarenaya hassleriana]
Gb_39245	6.44039	514	6.78953	827	5.83738	731	1.14251	164	1.28014	123	1.44333	118	8.93245e-16	2.35312	up	--	--	--	--	--	--	--	--	MEPFL1 {ECO:0000305} (Precursor) GN=F18D22.80 OS=Arabidopsis thaliana (Mouse-ear cress) PE=1 SV=1	R	General function prediction only	unknown [Picea sitchensis]
Gb_40096	2.218	242	2.63081	363	2.6641	432	0.544653	85	0.686126	60	0.696771	57	2.40206e-10	2.3515	up	--	--	--	--	--	--	--	ENT domain;; Agenet domain	--	R	General function prediction only	unknown [Picea sitchensis]
Gb_26901	12.4317	204	12.1984	268	14.3164	355	2.38338	80	2.77916	50	2.27217	38	8.36462e-09	2.34614	up	--	--	--	--	--	--	--	--	--	--	--	--
Gb_04453	8.23155	228	7.11042	264	9.4214	395	0.873848	85	0.839763	30	2.26074	64	3.32093e-09	2.33977	up	[G]	Carbohydrate transport and metabolism	Molecular Function: hydrolase activity, hydrolyzing O-glycosyl compounds (GO:0004553);; Biological Process: carbohydrate metabolic process (GO:0005975);;	K01188|0|vvi:100255329|K01188 beta-glucosidase [EC:3.2.1.21] | (RefSeq) beta-glucosidase 12	Cyanoamino acid metabolism (ko00460);; Starch and sucrose metabolism (ko00500);; Phenylpropanoid biosynthesis (ko00940)	[G]	Carbohydrate transport and metabolism	Glycosyl hydrolase family 1	Beta-glucosidase 13 (Precursor) OS=Oryza sativa subsp. japonica (Rice) PE=2 SV=2	G	Carbohydrate transport and metabolism	PREDICTED: beta-glucosidase 12-like [Nelumbo nucifera]
Gb_10432	2.15003	209	2.53533	330	2.15006	316	0.332968	67	0.63238	68	0.344307	34	3.21177e-09	2.33729	up	--	--	Molecular Function: transcription factor activity, sequence-specific DNA binding (GO:0003700);; Biological Process: regulation of transcription, DNA-templated (GO:0006355);; Molecular Function: sequence-specific DNA binding (GO:0043565);;	--	--	--	--	bZIP transcription factor;; Basic region leucine zipper;; bZIP Maf transcription factor	Ocs element-binding factor 1 GN=OBF1 OS=Zea mays (Maize) PE=2 SV=2	K	Transcription	unknown [Picea sitchensis]
Gb_41435	1.73797	114	1.98527	173	1.93668	194	0.361666	52	0.173837	14	0.471009	34	1.34761e-06	2.33119	up	--	--	Cellular Component: chloroplast envelope (GO:0009941);; Cellular Component: membrane (GO:0016020);;	--	--	--	--	Domain of unknown function (DUF3411)	--	S	Function unknown	hypothetical protein POPTR_0016s10280g [Populus trichocarpa]
Gb_01779	8.28647	947	4.76194	739	3.75063	659	1.34364	249	1.22208	129	1.20062	141	0.00450584	2.32889	up	[D]	Cell cycle control, cell division, chromosome partitioning	--	K18810|1.31907e-88|mus:103992226|K18810 cyclin D1/2/4, plant | (RefSeq) cyclin-D3-1	--	[D]	Cell cycle control, cell division, chromosome partitioning	Cyclin, N-terminal domain;; Cyclin, C-terminal domain	Cyclin-D4-1 OS=Oryza sativa subsp. japonica (Rice) PE=2 SV=2	D	Cell cycle control, cell division, chromosome partitioning	unknown [Picea sitchensis]
Gb_12805	7.44145	1251	6.49794	1460	6.50135	1653	1.54117	531	1.2393	228	1.19459	202	4.80401e-23	2.32418	up	--	--	Biological Process: regulation of transcription, DNA-templated (GO:0006355);;	--	--	--	--	GRAS domain family	Protein SCARECROW GN=SCR OS=Ipomoea nil (Japanese morning glory) PE=1 SV=1	K	Transcription	SCARECROW [Pinus sylvestris]
Gb_33546	21.7624	3543	22.9054	4950	21.9842	5448	4.76372	1578	4.59678	813	3.9088	600	6.75751e-37	2.3229	up	[C]	Energy production and conversion	Molecular Function: phosphoenolpyruvate carboxykinase (ATP) activity (GO:0004612);; Molecular Function: ATP binding (GO:0005524);; Biological Process: gluconeogenesis (GO:0006094);; Molecular Function: kinase activity (GO:0016301);; Biological Process: phosphorylation (GO:0016310);;	K01610|0|cmo:103495751|K01610 phosphoenolpyruvate carboxykinase (ATP) [EC:4.1.1.49] | (RefSeq) phosphoenolpyruvate carboxykinase [ATP]-like	Glycolysis / Gluconeogenesis (ko00010);; Citrate cycle (TCA cycle) (ko00020);; Pyruvate metabolism (ko00620);; Carbon fixation in photosynthetic organisms (ko00710);; Carbon metabolism (ko01200)	--	--	Phosphoenolpyruvate carboxykinase	Phosphoenolpyruvate carboxykinase [ATP] GN=PCKA OS=Arabidopsis thaliana (Mouse-ear cress) PE=1 SV=1	C	Energy production and conversion	PREDICTED: phosphoenolpyruvate carboxykinase [ATP]-like [Sesamum indicum]
Gb_17118	1.7022	125	1.10116	108	1.66219	185	0.387802	59	0.256638	21	0.203983	16	1.11336e-05	2.31696	up	--	--	--	--	--	--	--	U-box domain	E3 ubiquitin-protein ligase PUB23 GN=PUB23 OS=Arabidopsis thaliana (Mouse-ear cress) PE=1 SV=1	O	Posttranslational modification, protein turnover, chaperones	unknown [Picea sitchensis]
Gb_12246	21.6089	1108	16.9753	1163	13.5224	1048	3.28264	345	3.48066	195	3.54621	183	2.99556e-07	2.30988	up	[R]	General function prediction only	Molecular Function: carboxylic ester hydrolase activity (GO:0004091);; Biological Process: de-etiolation (GO:0009704);; Biological Process: response to sucrose (GO:0009744);; Biological Process: flavonoid biosynthetic process (GO:0009813);; Biological Process: response to UV-B (GO:0010224);; Molecular Function: retinyl-palmitate esterase activity (GO:0050253);; Molecular Function: methyl indole-3…	--	--	--	--	Alpha/beta hydrolase family;; alpha/beta hydrolase fold;; Alpha/beta hydrolase family	Probable esterase KAI2 GN=F6G17.120 OS=Arabidopsis thaliana (Mouse-ear cress) PE=1 SV=1	R	General function prediction only	unknown [Picea sitchensis]
Gb_07906	2.95307	156	2.474	175	2.94653	235	0.502731	55	0.510534	30	0.626232	34	4.46252e-07	2.2961	up	[RTKL]	General function prediction only;; Signal transduction mechanisms;; Transcription;; Replication, recombination and repair	Molecular Function: protein serine/threonine kinase activity (GO:0004674);; Molecular Function: ATP binding (GO:0005524);; Biological Process: protein phosphorylation (GO:0006468);;	K07760|9.78881e-143|brp:103829401|K07760 cyclin-dependent kinase [EC:2.7.11.22] | (RefSeq) cyclin-dependent kinase B2-2	--	[R]	General function prediction only	Protein kinase domain;; Protein tyrosine kinase	Cyclin-dependent kinase B1-1 OS=Oryza sativa subsp. japonica (Rice) PE=2 SV=1	D	Cell cycle control, cell division, chromosome partitioning	unknown [Picea sitchensis]
Gb_29347	4.98798	161	4.84962	209	4.41168	215	0.93871	62	0.830092	30	1.04449	34	4.86743e-07	2.29509	up	--	--	Molecular Function: nucleotide binding (GO:0000166);; Molecular Function: protein kinase activity (GO:0004672);; Cellular Component: membrane (GO:0016020);; Biological Process: phosphorylation (GO:0016310);;	--	--	[T]	Signal transduction mechanisms	Protein tyrosine kinase;; Protein kinase domain	Probable serine/threonine-protein kinase At1g01540 GN=At1g01540 OS=Arabidopsis thaliana (Mouse-ear cress) PE=1 SV=2	T	Signal transduction mechanisms	hypothetical protein JCGZ_01310 [Jatropha curcas]
Gb_29238	20.9479	626	13.2461	529	11.4255	516	2.49085	153	3.67242	120	3.03814	92	0.000335657	2.28397	up	--	--	--	--	--	--	--	Plastocyanin-like domain	Lamin-like protein (Precursor) GN=At5g15350 OS=Arabidopsis thaliana (Mouse-ear cress) PE=1 SV=1	R	General function prediction only	unknown [Picea sitchensis]
Gb_32108	3.90261	401	2.43247	334	2.55985	398	0.76992	162	0.342578	39	0.658837	69	6.87214e-05	2.28384	up	--	--	--	--	--	--	--	--	--	--	--	unknown [Picea sitchensis]
Gb_39829	36.6658	4056	33.0257	4890	26.4804	4429	6.99392	1588	6.64636	807	5.67831	637	9.49349e-13	2.27633	up	[R]	General function prediction only	Molecular Function: ATP binding (GO:0005524);; Molecular Function: nucleoside-triphosphatase activity (GO:0017111);;	K17681|0|pda:103720988|K17681 ATPase family AAA domain-containing protein 3A/B | (RefSeq) ATPase family AAA domain-containing protein 3-like	--	[O]	Posttranslational modification, protein turnover, chaperones	Domain of unknown function (DUF3523);; ATPase family associated with various cellular activities (AAA)	26S protease regulatory subunit 6A homolog GN=TBP1 OS=Solanum lycopersicum (Tomato) PE=2 SV=1	O	Posttranslational modification, protein turnover, chaperones	PREDICTED: ATPase family AAA domain-containing protein 3-B [Nelumbo nucifera]
Gb_34391	0.677953	61	0.993766	118	0.69519	94	0.111185	21	0.144352	14	0.22305	20	2.24049e-05	2.27101	up	[P]	Inorganic ion transport and metabolism	Molecular Function: potassium channel activity (GO:0005267);; Cellular Component: membrane (GO:0016020);; Biological Process: metal ion transport (GO:0030001);; Biological Process: single-organism cellular process (GO:0044763);; Biological Process: biological regulation (GO:0065007);;	K05389|4.54147e-104|pmum:103342722|K05389 potassium channel subfamily K, other eukaryote | (RefSeq) two-pore potassium channel 1	--	[P]	Inorganic ion transport and metabolism	Ion channel;; Ion transport protein	Two-pore potassium channel 1 GN=MDF20.7 OS=Arabidopsis thaliana (Mouse-ear cress) PE=1 SV=2	P	Inorganic ion transport and metabolism	PREDICTED: two-pore potassium channel 1 [Prunus mume]
Gb_22873	2.76515	502	3.68446	894	2.59509	716	0.668973	246	0.465893	93	0.702516	128	5.86374e-13	2.26885	up	[M]	Cell wall/membrane/envelope biogenesis	Biological Process: sucrose metabolic process (GO:0005985);; Biological Process: biosynthetic process (GO:0009058);; Molecular Function: sucrose synthase activity (GO:0016157);;	--	--	[M]	Cell wall/membrane/envelope biogenesis	Sucrose synthase;; Glycosyl transferases group 1;; Glycosyl transferases group 1	Sucrose synthase 3 GN=SUS3 OS=Arabidopsis thaliana (Mouse-ear cress) PE=1 SV=1	M	Cell wall/membrane/envelope biogenesis	sucrose synthase [Pinus taeda]
Gb_10809	1.36975	111	0.741854	81	0.665773	82	0.08353	14	0.226075	20	0.262687	22	0.00366473	2.25747	up	--	--	--	--	--	--	--	AP2 domain	Ethylene-responsive transcription factor RAP2-11 GN=T29J13.210 OS=Arabidopsis thaliana (Mouse-ear cress) PE=2 SV=1	S	Function unknown	AP2 domain class transcription factor [Medicago truncatula]
Gb_36009	10.3394	1349	8.00373	1335	8.15918	1453	1.66892	426	2.03249	276	1.67307	220	2.10102e-09	2.25678	up	--	--	--	--	--	--	--	--	--	R	General function prediction only	hypothetical protein L484_014298 [Morus notabilis]
Gb_13453	7.15139	289	5.84355	315	4.96444	303	1.11613	93	1.63391	72	0.960877	39	1.61312e-08	2.24421	up	--	--	--	--	--	--	--	--	--	--	--	hypothetical protein 0_10044_01, partial [Pinus taeda]
Gb_40171	20.5765	1959	21.915	2789	23.1264	3330	4.08301	796	4.51249	470	4.93462	473	3.40989e-32	2.24273	up	--	--	--	K16275|4.24009e-46|mus:103983517|K16275 E3 ubiquitin-protein ligase BAH [EC:2.3.2.27] | (RefSeq) probable E3 ubiquitin-protein ligase BAH1-like 1 isoform X1	--	--	--	--	Probable E3 ubiquitin-protein ligase BAH1-like 1 OS=Oryza sativa subsp. japonica (Rice) PE=2 SV=1	O	Posttranslational modification, protein turnover, chaperones	unknown [Picea sitchensis]
Gb_22865	1.19913	138	1.29552	199	1.47202	256	0.301796	71	0.233793	30	0.270098	32	8.88665e-07	2.23903	up	--	--	--	--	--	[S]	Function unknown	Protein of unknown function (DUF563)	--	S	Function unknown	BnaA05g21960D [Brassica napus]
Gb_03201	1.53513	178	2.25255	349	2.27644	398	0.607851	144	0.462404	59	0.157939	19	7.16262e-08	2.23824	up	--	--	--	--	--	--	--	--	--	--	--	--
Gb_07733	2.11498	334	1.50657	318	1.46558	350	0.405515	131	0.359841	62	0.289443	46	2.48072e-07	2.23804	up	[RTKL]	General function prediction only;; Signal transduction mechanisms;; Transcription;; Replication, recombination and repair	Biological Process: MAPK cascade (GO:0000165);; Molecular Function: nucleotide binding (GO:0000166);; Molecular Function: protein serine/threonine kinase activity (GO:0004674);; Biological Process: protein phosphorylation (GO:0006468);;	K04733|1.30429e-68|tcc:TCM_010473|K04733 interleukin-1 receptor-associated kinase 4 [EC:2.7.11.1] | (RefSeq) Kinase family protein / peptidoglycan-binding LysM domain-containing protein, putative	--	--	--	Protein kinase domain;; Protein tyrosine kinase	LysM domain receptor-like kinase 3 (Precursor) GN=LYK3 OS=Arabidopsis thaliana (Mouse-ear cress) PE=2 SV=1	T	Signal transduction mechanisms	Kinase family protein / peptidoglycan-binding LysM domain-containing protein, putative [Theobroma cacao]
Gb_25258	0.704666	73	0.540944	75	0.534233	84	0.175695	38	0.156495	18	0.019357	3	0.000387914	2.2355	up	[Q]	Secondary metabolites biosynthesis, transport and catabolism	Molecular Function: oxidoreductase activity (GO:0016491);; Molecular Function: metal ion binding (GO:0046872);;	--	--	[QI]	Secondary metabolites biosynthesis, transport and catabolism;; Lipid transport and metabolism	Cytochrome P450	Cytochrome P450 734A1 GN=F18A8.8 OS=Arabidopsis thaliana (Mouse-ear cress) PE=2 SV=1	Q	Secondary metabolites biosynthesis, transport and catabolism	hypothetical protein JCGZ_13283 [Jatropha curcas]
Gb_01409	3.60204	79	3.53226	103	3.08302	101	0.538739	24	0.931641	23	0.649627	14	3.6418e-05	2.2276	up	--	--	--	--	--	--	--	BURP domain	BURP domain-containing protein 12 (Precursor) GN=P0709D11.28 OS=Oryza sativa subsp. japonica (Rice) PE=2 SV=1	R	General function prediction only	unknown [Picea sitchensis]
Gb_40254	4.54442	594	3.98036	634	3.84754	760	0.868024	221	1.05954	152	0.627545	82	3.18146e-13	2.22479	up	[GEPR]	Carbohydrate transport and metabolism;; Amino acid transport and metabolism;; Inorganic ion transport and metabolism;; General function prediction only	Biological Process: transport (GO:0006810);; Cellular Component: membrane (GO:0016020);; Molecular Function: transmembrane transporter activity (GO:0022857);;	--	--	[R]	General function prediction only	Sugar (and other) transporter;; Major Facilitator Superfamily	Sugar transporter ERD6-like 6 GN=At1g75220 OS=Arabidopsis thaliana (Mouse-ear cress) PE=1 SV=1	R	General function prediction only	unknown [Picea sitchensis]
NG_11791	0.891798	107	0.580288	94	0.523561	97	0.169296	42	0.159084	22	0.082673	10	0.000219341	2.22189	up	[DPM]	Cell cycle control, cell division, chromosome partitioning;; Inorganic ion transport and metabolism;; Cell wall/membrane/envelope biogenesis	Molecular Function: copper ion binding (GO:0005507);; Biological Process: lignin biosynthetic process (GO:0009809);; Molecular Function: oxidoreductase activity, oxidizing metal ions (GO:0016722);; Biological Process: lignin catabolic process (GO:0046274);; Cellular Component: apoplast (GO:0048046);; Molecular Function: hydroquinone:oxygen oxidoreductase activity (GO:0052716);; Biological Process…	K05909|0|pda:103707700|K05909 laccase [EC:1.10.3.2] | (RefSeq) laccase-6-like	--	[Q]	Secondary metabolites biosynthesis, transport and catabolism	Multicopper oxidase;; Multicopper oxidase;; Multicopper oxidase	Laccase-6 OS=Arabidopsis thaliana OX=3702 GN=LAC6 PE=2 SV=1	Q	Secondary metabolites biosynthesis, transport and catabolism	PREDICTED: laccase-6-like [Phoenix dactylifera]
Gb_36084	20.5844	690	23.231	1040	29.0094	1469	5.71464	392	4.57369	168	4.92365	166	5.31567e-18	2.21403	up	[O]	Posttranslational modification, protein turnover, chaperones	--	--	--	[O]	Posttranslational modification, protein turnover, chaperones	DnaJ domain	Chaperone protein dnaJ 11, chloroplastic (Precursor) GN=T19K4.170 OS=Arabidopsis thaliana (Mouse-ear cress) PE=1 SV=2	O	Posttranslational modification, protein turnover, chaperones	unknown [Picea sitchensis]
Gb_21649	6.47198	548	6.75873	765	5.14474	659	1.56725	272	0.883718	82	1.41929	121	1.98104e-12	2.2082	up	--	--	Molecular Function: hydrolase activity, hydrolyzing O-glycosyl compounds (GO:0004553);; Cellular Component: cell wall (GO:0005618);; Biological Process: cellular glucan metabolic process (GO:0006073);; Molecular Function: xyloglucan:xyloglucosyl transferase activity (GO:0016762);; Cellular Component: apoplast (GO:0048046);;	--	--	--	--	Glycosyl hydrolases family 16;; Xyloglucan endo-transglycosylase (XET) C-terminus	Probable xyloglucan endotransglucosylase/hydrolase protein 10 (Precursor) GN=T6B13.14 OS=Arabidopsis thaliana (Mouse-ear cress) PE=2 SV=1	G	Carbohydrate transport and metabolism	PREDICTED: probable xyloglucan endotransglucosylase/hydrolase protein 10 [Nelumbo nucifera]
Gb_01098	136.731	3917	104.723	4010	98.3667	4261	23.5865	1383	27.1177	849	21.539	621	6.05763e-10	2.20434	up	[S]	Function unknown	Cellular Component: extracellular region (GO:0005576);;	--	--	[S]	Function unknown	Cysteine-rich secretory protein family	STS14 protein (Precursor) GN=STS14 OS=Solanum tuberosum (Potato) PE=2 SV=1	S	Function unknown	unknown [Picea sitchensis]
Gb_22744	15.9977	1008	15.0872	1271	15.6995	1496	3.16029	408	3.3723	233	3.36474	214	2.0525e-20	2.20389	up	--	--	Molecular Function: oxidoreductase activity, acting on paired donors, with incorporation or reduction of molecular oxygen, 2-oxoglutarate as one donor, and incorporation of one atom each of oxygen into both donors (GO:0016706);; Biological Process: oxidation-reduction process (GO:0055114);;	--	--	[QR]	Secondary metabolites biosynthesis, transport and catabolism;; General function prediction only	non-haem dioxygenase in morphine synthesis N-terminal	Flavonol synthase/flavanone 3-hydroxylase GN=FLS OS=Citrus unshiu (Satsuma mandarin) PE=1 SV=1	R	General function prediction only	unknown [Picea sitchensis]
Gb_26087	4.17215	523	6.11772	1025	6.46619	1225	1.58498	407	1.04873	144	0.871842	110	9.16502e-11	2.20318	up	--	--	Molecular Function: nucleic acid binding (GO:0003676);; Molecular Function: metal ion binding (GO:0046872);;	--	--	[R]	General function prediction only	Zinc finger, C2H2 type	Protein SHOOT GRAVITROPISM 5 GN=At2g01940 OS=Arabidopsis thaliana (Mouse-ear cress) PE=1 SV=1	R	General function prediction only	unnamed protein product [Coffea canephora]
NG_18717	2.82423	210	3.05427	303	2.74962	309	0.743931	113	0.483383	40	0.581928	44	1.67609e-07	2.20108	up	--	--	--	--	--	--	--	Thaumatin family	Thaumatin-like protein OS=Arabidopsis thaliana OX=3702 GN=At1g18250 PE=2 SV=2	S	Function unknown	pathogenesis-related protein 5 isoform X1 [Jatropha curcas]
Gb_32351	0.64997	90	0.645481	119	0.984338	205	0.208963	49	0.162559	25	0.150067	20	1.09325e-05	2.19474	up	--	--	--	--	--	--	--	Helix-loop-helix DNA-binding domain	Transcription factor FAMA GN=MUJ8.4 OS=Arabidopsis thaliana (Mouse-ear cress) PE=1 SV=1	K	Transcription	transcription factor FAMA, partial [Picea smithiana]
Gb_01254	25.7588	2365	26.1776	3221	26.4276	3683	6.05242	1120	5.28809	515	5.93332	532	2.73659e-30	2.18347	up	[Z]	Cytoskeleton	Molecular Function: ATP binding (GO:0005524);; Cellular Component: cytoplasm (GO:0005737);; Cellular Component: cytoskeleton (GO:0005856);;	K10355|0|ppp:PHYPADRAFT_226658|K10355 actin, other eukaryote | (RefSeq) hypothetical protein	--	[Z]	Cytoskeleton	Actin	Actin-7 GN=ACT7 OS=Arabidopsis thaliana (Mouse-ear cress) PE=1 SV=1	Z	Cytoskeleton	unknown [Picea sitchensis]
Gb_08072	3.47201	136	2.407	127	2.40398	143	0.538615	44	0.67548	29	0.58324	23	1.64386e-05	2.17295	up	--	--	--	--	--	--	--	Plant invertase/pectin methylesterase inhibitor	21 kDa protein (Precursor) OS=Daucus carota (Wild carrot) PE=2 SV=1	R	General function prediction only	unknown [Picea sitchensis]
Gb_26697	0.630566	60	1.21995	154	1.01066	144	0.189673	37	0.287655	30	0.128523	13	1.946e-05	2.16715	up	--	--	--	--	--	--	--	Myb/SANT-like DNA-binding domain	--	S	Function unknown	hypothetical protein SELMODRAFT_402580 [Selaginella moellendorffii]
Gb_24651	1.13789	103	1.16835	182	0.819969	145	0.374092	90	0.094624	13	0.131374	16	9.08495e-05	2.16589	up	[Q]	Secondary metabolites biosynthesis, transport and catabolism	Molecular Function: iron ion binding (GO:0005506);; Cellular Component: extracellular region (GO:0005576);; Molecular Function: electron carrier activity (GO:0009055);; Biological Process: response to red or far red light (GO:0009639);; Biological Process: abscisic acid metabolic process (GO:0009687);; Molecular Function: (+)-abscisic acid 8'-hydroxylase activity (GO:0010295);; Molecular Function…	K09843|0|pop:POPTR_0004s24360g|K09843 (+)-abscisic acid 8'-hydroxylase [EC:1.14.13.93] | (RefSeq) cytochrome P450 family protein	Carotenoid biosynthesis (ko00906)	[QI]	Secondary metabolites biosynthesis, transport and catabolism;; Lipid transport and metabolism	Cytochrome P450	Abscisic acid 8&apos;-hydroxylase 1 GN=CYP707A1 OS=Arabidopsis thaliana (Mouse-ear cress) PE=2 SV=1	Q	Secondary metabolites biosynthesis, transport and catabolism	hypothetical protein CISIN_1g038621mg [Citrus sinensis]
Gb_07998	0.554575	57	0.762172	124	0.556413	76	0.281434	55	0.068622	11	0.040028	6	0.00310693	2.16142	up	[O]	Posttranslational modification, protein turnover, chaperones	Molecular Function: hydrolase activity (GO:0016787);;	--	--	--	--	Subtilase family;; Peptidase inhibitor I9;; PA domain	Subtilisin-like protease SBT5.3 (Precursor) OS=Arabidopsis thaliana (Mouse-ear cress) PE=2 SV=1	O	Posttranslational modification, protein turnover, chaperones	PREDICTED: subtilisin-like protease SBT5.3 isoform X4 [Elaeis guineensis]
Gb_09362	8.89251	335	7.41157	373	6.8869	392	1.75414	136	1.30747	54	1.9981	76	8.76931e-09	2.15893	up	--	--	Molecular Function: copper ion binding (GO:0005507);; Cellular Component: plasma membrane (GO:0005886);; Cellular Component: anchored component of membrane (GO:0031225);;	--	--	--	--	Plastocyanin-like domain	Early nodulin-like protein 1 (Precursor) GN=At2g25060 OS=Arabidopsis thaliana (Mouse-ear cress) PE=1 SV=2	R	General function prediction only	unknown [Picea sitchensis]
Gb_07742	0.301394	89	0.400135	157	0.647053	153	0.119769	40	0.062716	21	0.097603	29	1.15532e-05	2.15298	up	[R]	General function prediction only	--	--	--	[T]	Signal transduction mechanisms	Ankyrin repeats (3 copies);; Ankyrin repeat;; Ankyrin repeats (many copies);; Ankyrin repeats (many copies);; KAP family P-loop domain;; Ankyrin repeat	Ankyrin repeat-containing protein At5g02620 GN=At5g02620 OS=Arabidopsis thaliana (Mouse-ear cress) PE=1 SV=1	R	General function prediction only	hypothetical protein [Cryptomeria japonica]
Gb_28257	1.58486	94	1.73578	137	1.26422	113	0.544655	66	0.197978	13	0.249652	15	0.00019378	2.15046	up	[R]	General function prediction only	Molecular Function: O-methyltransferase activity (GO:0008171);; Biological Process: methylation (GO:0032259);;	K00545|3.80144e-71|ppp:PHYPADRAFT_229935|K00545 catechol O-methyltransferase [EC:2.1.1.6] | (RefSeq) hypothetical protein	Tyrosine metabolism (ko00350);; Betalain biosynthesis (ko00965)	[Q]	Secondary metabolites biosynthesis, transport and catabolism	O-methyltransferase;; Methyltransferase domain;; Methyltransferase domain;; Methyltransferase domain	--	Q	Secondary metabolites biosynthesis, transport and catabolism	unknown [Picea sitchensis]
Gb_21106	569.33	15522	616.025	22450	526.292	21699	94.8331	5293	160.962	4794	122.762	3365	1.02838e-41	2.14868	up	--	--	--	--	--	--	--	--	--	--	--	--
Gb_32033	0.507625	70	0.54193	99	0.588834	122	0.180308	51	0.06676	10	0.104547	15	0.000237153	2.14797	up	[O]	Posttranslational modification, protein turnover, chaperones	Molecular Function: peptidase activity (GO:0008233);;	--	--	--	--	Subtilase family;; Peptidase inhibitor I9;; PA domain	Subtilisin-like protease SBT5.3 (Precursor) OS=Arabidopsis thaliana (Mouse-ear cress) PE=2 SV=1	O	Posttranslational modification, protein turnover, chaperones	PREDICTED: subtilisin-like protease SBT5.3 [Phoenix dactylifera]
Gb_40468	2.24379	103	3.61082	206	3.61454	260	0.935381	87	0.673722	37	0.3803	17	5.42011e-06	2.14791	up	--	--	--	--	--	--	--	--	--	--	--	--
Gb_24112	0.842657	71	1.50713	133	0.910074	102	0.122557	21	0.361489	26	0.281824	19	2.57487e-05	2.14256	up	--	--	--	--	--	[R]	General function prediction only	WD domain, G-beta repeat	Varicose-related protein GN=VCR OS=Arabidopsis thaliana (Mouse-ear cress) PE=2 SV=1	R	General function prediction only	hypothetical protein AMTR_s00061p00131900 [Amborella trichopoda]
Gb_33335	0.521024	79	0.612356	124	0.609984	140	0.373344	116	0	0	0	0	0.0150787	2.13241	up	--	--	Biological Process: DNA metabolic process (GO:0006259);; Biological Process: meiosis I (GO:0007127);;	--	--	[R]	General function prediction only	PPR repeat family;; PPR repeat;; Pentatricopeptide repeat domain;; PPR repeat;; DYW family of nucleic acid deaminases;; Tetratricopeptide repeat;; Tetratricopeptide repeat;; Transposase-associated domain;; Tetratricopeptide repeat	Pentatricopeptide repeat-containing protein DOT4, chloroplastic {ECO:0000305} (Precursor) GN=At4g18750 OS=Arabidopsis thaliana (Mouse-ear cress) PE=2 SV=1	R	General function prediction only	unknown [Picea sitchensis]
Gb_30118	0.886191	141	1.01078	215	1.02993	246	0.261808	74	0.248588	28	0.350234	42	1.97743e-06	2.12812	up	[LKJ]	Replication, recombination and repair;; Transcription;; Translation, ribosomal structure and biogenesis	Molecular Function: nucleic acid binding (GO:0003676);; Molecular Function: ATP binding (GO:0005524);; Molecular Function: ATP-dependent helicase activity (GO:0008026);; Biological Process: modulation by virus of host morphology or physiology (GO:0019048);;	K12614|1.90747e-58|pop:POPTR_0014s07690g|K12614 ATP-dependent RNA helicase DDX6/DHH1 [EC:3.6.4.13] | (RefSeq) POPTRDRAFT_731050; hypothetical protein	RNA degradation (ko03018)	[A]	RNA processing and modification	DEAD/DEAH box helicase	DEAD-box ATP-dependent RNA helicase 6 OS=Oryza sativa subsp. japonica (Rice) PE=2 SV=1	A	RNA processing and modification	hypothetical protein POPTR_0014s07690g [Populus trichocarpa]
Gb_13378	6.2239	817	5.44745	956	6.09451	1209	1.33987	360	1.4104	202	1.2142	161	3.01543e-16	2.12788	up	--	--	Biological Process: circadian rhythm (GO:0007623);; Cellular Component: chloroplast (GO:0009507);; Biological Process: glucosinolate biosynthetic process (GO:0019761);;	--	--	--	--	Nodulin-like	--	R	General function prediction only	unknown [Picea sitchensis]
Gb_08865	12.7257	282	12.0442	356	13.3679	447	2.47271	112	3.67107	89	2.3633	53	5.83258e-09	2.1269	up	[OC]	Posttranslational modification, protein turnover, chaperones;; Energy production and conversion	Biological Process: glycerol ether metabolic process (GO:0006662);; Molecular Function: electron carrier activity (GO:0009055);; Molecular Function: protein disulfide oxidoreductase activity (GO:0015035);; Biological Process: cellular metabolic process (GO:0044237);; Biological Process: primary metabolic process (GO:0044238);; Biological Process: cell redox homeostasis (GO:0045454);;	--	--	[O]	Posttranslational modification, protein turnover, chaperones	Thioredoxin	Thioredoxin-like protein CXXS1 GN=CXXS1 OS=Arabidopsis thaliana (Mouse-ear cress) PE=2 SV=2	O	Posttranslational modification, protein turnover, chaperones	unknown [Picea sitchensis]
Gb_37312	4.4283	293	3.47419	308	4.24654	425	0.630321	86	1.25004	91	0.844675	57	5.76188e-09	2.11822	up	--	--	Molecular Function: peroxidase activity (GO:0004601);; Cellular Component: vacuole (GO:0005773);; Biological Process: response to oxidative stress (GO:0006979);; Cellular Component: plant-type cell wall (GO:0009505);; Cellular Component: membrane (GO:0016020);; Molecular Function: heme binding (GO:0020037);; Molecular Function: metal ion binding (GO:0046872);; Biological Process: oxidation-reduct…	K00430|2.56527e-151|pop:POPTR_0002s06590g|K00430 peroxidase [EC:1.11.1.7] | (RefSeq) POPTRDRAFT_830144; peroxidase precursor family protein	Phenylpropanoid biosynthesis (ko00940)	--	--	Peroxidase	Peroxidase 12 (Precursor) OS=Arabidopsis thaliana (Mouse-ear cress) PE=1 SV=1	G	Carbohydrate transport and metabolism	peroxidase [Picea abies]
Gb_22737	0.48013	87	1.00596	243	0.859058	234	0.134764	50	0.178364	35	0.205547	39	3.25076e-05	2.11516	up	[P]	Inorganic ion transport and metabolism	Molecular Function: copper-exporting ATPase activity (GO:0004008);; Molecular Function: copper ion binding (GO:0005507);; Molecular Function: ATP binding (GO:0005524);; Biological Process: detoxification of copper ion (GO:0010273);; Cellular Component: integral component of membrane (GO:0016021);; Biological Process: copper ion export (GO:0060003);;	K17686|0|pmum:103337500|K17686 Cu+-exporting ATPase [EC:3.6.3.54] | (RefSeq) probable copper-transporting ATPase HMA5	--	[P]	Inorganic ion transport and metabolism	haloacid dehalogenase-like hydrolase;; E1-E2 ATPase;; Heavy-metal-associated domain;; haloacid dehalogenase-like hydrolase;; haloacid dehalogenase-like hydrolase	Probable copper-transporting ATPase HMA5 GN=HMA5 OS=Arabidopsis thaliana (Mouse-ear cress) PE=1 SV=2	P	Inorganic ion transport and metabolism	PREDICTED: probable copper-transporting ATPase HMA5 [Prunus mume]
Gb_07749	1.47608	117	1.4938	154	1.72777	195	0.51751	78	0.265743	26	0.211712	19	3.45365e-05	2.11294	up	--	--	Molecular Function: hydrolase activity (GO:0016787);;	--	--	--	--	GDSL-like Lipase/Acylhydrolase	GDSL esterase/lipase LIP-4 (Precursor) GN=LIP4 OS=Arabidopsis thaliana (Mouse-ear cress) PE=2 SV=1	R	General function prediction only	PREDICTED: GDSL esterase/lipase At1g54790 [Vitis vinifera]
Gb_29191	2.22798	378	2.25995	450	1.8098	401	0.700727	201	0.339395	67	0.338236	62	2.46976e-08	2.10899	up	--	--	Cellular Component: plasma membrane (GO:0005886);; Biological Process: pattern specification process (GO:0007389);; Cellular Component: membrane part (GO:0044425);; Biological Process: single-organism transport (GO:0044765);; Biological Process: developmental growth (GO:0048589);; Biological Process: root hair cell differentiation (GO:0048765);; Biological Process: regulation of biological proces…	K13947|0|cit:102631111|K13947 auxin efflux carrier family | (RefSeq) auxin efflux carrier component 3	--	--	--	Membrane transport protein	Auxin efflux carrier component 2 GN=At5g57090 OS=Arabidopsis thaliana (Mouse-ear cress) PE=1 SV=2	P	Inorganic ion transport and metabolism	PIN-like protein, partial [Thuja plicata]
Gb_17754	3.3696	198	3.5921	281	3.21588	285	0.853308	103	0.562613	36	0.868261	52	6.11844e-07	2.10767	up	[I]	Lipid transport and metabolism	--	K14493|4.1853e-109|ppp:PHYPADRAFT_118478|K14493 gibberellin receptor GID1 [EC:3.-.-.-] | (RefSeq) GLP1; GLP1 GID1-like protein	Plant hormone signal transduction (ko04075)	[V]	Defense mechanisms	alpha/beta hydrolase fold;; Carboxylesterase family;; Chlorophyllase enzyme	Gibberellin receptor GID1C GN=F21A20.30 OS=Arabidopsis thaliana (Mouse-ear cress) PE=1 SV=1	V	Defense mechanisms	unknown [Picea sitchensis]
NG_10534	2.17293	482	2.3901	712	1.95042	657	0.482291	218	0.56648	140	0.420728	96	1.03143e-11	2.1004	up	--	--	--	--	--	--	--	Protein kinase domain	Trihelix transcription factor ASR3 OS=Arabidopsis thaliana OX=3702 GN=ASR3 PE=1 SV=1	S	Function unknown	PREDICTED: uncharacterized protein LOC104608361 [Nelumbo nucifera]
Gb_08038	2.18486	71	2.24593	97	1.84983	91	0.636227	43	0.167491	6	0.592566	20	0.000411811	2.0949	up	--	--	Molecular Function: zinc ion binding (GO:0008270);;	--	--	[O]	Posttranslational modification, protein turnover, chaperones	Ring finger domain;; RING-H2 zinc finger;; Zinc finger, C3HC4 type (RING finger);; Zinc finger, C3HC4 type (RING finger);; Zinc finger, C3HC4 type (RING finger);; Anaphase-promoting complex subunit 11 RING-H2 finger	Putative RING-H2 finger protein ATL71 GN=ATL71 OS=Arabidopsis thaliana (Mouse-ear cress) PE=3 SV=1	O	Posttranslational modification, protein turnover, chaperones	predicted protein [Physcomitrella patens]
Gb_40492	11.3714	397	11.5725	540	13.1669	695	2.36008	169	3.38092	129	2.51431	89	3.56744e-11	2.09054	up	--	--	--	--	--	--	--	Senescence regulator	--	S	Function unknown	unknown [Picea sitchensis]
Gb_14261	27.9771	2718	21.1507	2747	22.7787	3347	6.14046	1222	5.61954	597	4.73284	463	2.14232e-12	2.08898	up	[E]	Amino acid transport and metabolism	Molecular Function: proline dehydrogenase activity (GO:0004657);; Biological Process: glutamate biosynthetic process (GO:0006537);; Biological Process: proline catabolic process (GO:0006562);; Biological Process: oxidation-reduction process (GO:0055114);;	K00318|0|ppp:PHYPADRAFT_146384|K00318 proline dehydrogenase [EC:1.5.-.-] | (RefSeq) hypothetical protein	Arginine and proline metabolism (ko00330)	[E]	Amino acid transport and metabolism	Proline dehydrogenase	Proline dehydrogenase 2, mitochondrial (Precursor) GN=MKD10.10 OS=Arabidopsis thaliana (Mouse-ear cress) PE=2 SV=1	E	Amino acid transport and metabolism	predicted protein [Physcomitrella patens]
Gb_01894	0.760262	132	1.02544	238	1.86193	489	0.43595	155	0.214988	41	0.167086	30	0.010984	2.08276	up	--	--	--	--	--	[R]	General function prediction only	Leucine rich repeat;; Leucine Rich repeats (2 copies);; Leucine Rich Repeat;; Leucine Rich repeat;; Leucine rich repeat N-terminal domain;; Leucine rich repeat	Receptor-like protein 12 (Precursor) GN=RLP12 OS=Arabidopsis thaliana (Mouse-ear cress) PE=2 SV=2	R	General function prediction only	LRR receptor-like kinase family protein [Medicago truncatula]
Gb_08822	6.11255	526	5.60273	644	6.86515	893	1.36671	241	1.62662	153	1.28367	111	1.55069e-12	2.0827	up	--	--	Molecular Function: transferase activity (GO:0016740);;	--	--	--	--	D-mannose binding lectin;; S-locus glycoprotein family	G-type lectin S-receptor-like serine/threonine-protein kinase RLK1 (Precursor) GN=RLK1 OS=Arabidopsis thaliana (Mouse-ear cress) PE=2 SV=2	T	Signal transduction mechanisms	hypothetical protein AMTR_s00022p00194170 [Amborella trichopoda]
Gb_33579	41.4652	916	29.1904	862	28.4838	952	7.27683	329	7.81296	189	7.92894	177	5.89749e-07	2.07698	up	--	--	--	--	--	--	--	--	--	S	Function unknown	unknown [Picea sitchensis]
NG_13363	4.12571	273	3.70727	329	4.07226	404	0.895529	124	1.18263	86	0.63059	43	5.54475e-08	2.07539	up	--	--	Molecular Function: DNA binding (GO:0003677);; Cellular Component: nucleus (GO:0005634);; Biological Process: cell proliferation (GO:0008283);; Biological Process: flower development (GO:0009908);; Biological Process: adaxial/abaxial axis specification (GO:0009943);; Biological Process: centrolateral axis specification (GO:0009947);; Biological Process: stipule development (GO:0010865);; Biologic…	--	--	--	--	Homeobox domain	WUSCHEL-related homeobox 3 OS=Arabidopsis thaliana OX=3702 GN=WOX3 PE=1 SV=1	--	--	putative wuschel homeobox protein WOX3B [Ginkgo biloba]
Gb_33696	26.2416	874	28.0263	1248	22.9128	1154	6.1565	420	5.10425	186	6.67231	224	1.61564e-16	2.07002	up	--	--	--	--	--	--	--	Embryo-specific protein 3, (ATS3)	--	R	General function prediction only	unknown [Picea sitchensis]
Gb_04559	23.2773	3032	12.7524	2082	18.3598	3616	4.76219	1206	2.97519	445	4.74001	636	0.000438511	2.06996	up	[G]	Carbohydrate transport and metabolism	Biological Process: metabolic process (GO:0008152);; Molecular Function: hydrolase activity, acting on glycosyl bonds (GO:0016798);;	--	--	[G]	Carbohydrate transport and metabolism	Glycosyl hydrolases family 32 N-terminal domain;; Glycosyl hydrolases family 32 C terminal	Beta-fructofuranosidase, insoluble isoenzyme 1 (Precursor) GN=INV1 OS=Daucus carota (Wild carrot) PE=1 SV=1	G	Carbohydrate transport and metabolism	PREDICTED: beta-fructofuranosidase, insoluble isoenzyme CWINV1 [Nelumbo nucifera]
Gb_30969	0.617088	60	0.82699	107	0.642585	94	0.213779	42	0.116509	13	0.149284	15	0.000433955	2.05089	up	[U]	Intracellular trafficking, secretion, and vesicular transport	Cellular Component: endoplasmic reticulum (GO:0005783);; Cellular Component: Golgi apparatus (GO:0005794);; Cellular Component: plasma membrane (GO:0005886);; Cellular Component: integral component of membrane (GO:0016021);; Biological Process: vesicle-mediated transport (GO:0016192);;	K08517|7.22494e-54|ppp:PHYPADRAFT_228618|K08517 vesicle transport protein SEC22 | (RefSeq) SEC22A2-2, SEC22A2-1; R-SNARE, SEC22-family	SNARE interactions in vesicular transport (ko04130);; Phagosome (ko04145)	[U]	Intracellular trafficking, secretion, and vesicular transport	Regulated-SNARE-like domain	25.3 kDa vesicle transport protein GN=SEC22 OS=Arabidopsis thaliana (Mouse-ear cress) PE=2 SV=1	U	Intracellular trafficking, secretion, and vesicular transport	unknown [Picea sitchensis]
Gb_29180	23.5648	2348	23.1677	3088	21.2965	3212	6.64313	1353	4.60868	498	4.85181	479	5.60645e-25	2.05017	up	[Z]	Cytoskeleton	Molecular Function: structural constituent of cytoskeleton (GO:0005200);; Molecular Function: protein binding (GO:0005515);; Molecular Function: ATP binding (GO:0005524);; Cellular Component: cell wall (GO:0005618);; Cellular Component: nucleolus (GO:0005730);; Cellular Component: mitochondrion (GO:0005739);; Cellular Component: cytosol (GO:0005829);; Cellular Component: cytoskeleton (GO:0005856)…	K10355|0|mus:103972882|K10355 actin, other eukaryote | (RefSeq) actin-like	--	[Z]	Cytoskeleton	Actin	Actin-7 GN=ACT7 OS=Arabidopsis thaliana (Mouse-ear cress) PE=1 SV=1	Z	Cytoskeleton	unknown [Picea sitchensis]
Gb_36168	1.95098	223	1.99085	304	2.07593	359	0.379243	89	0.210399	27	0.829097	96	7.36535e-08	2.04408	up	--	--	--	--	--	[R]	General function prediction only	PPR repeat family;; PPR repeat;; PPR repeat;; Pentatricopeptide repeat domain;; Tetratricopeptide repeat;; Tetratricopeptide repeat	Pentatricopeptide repeat-containing protein At2g13600 GN=PCMP-E76 OS=Arabidopsis thaliana (Mouse-ear cress) PE=3 SV=1	R	General function prediction only	unknown [Picea sitchensis]
Gb_25965	10.9715	546	9.52288	634	8.25	621	2.88749	295	3.42838	187	0.458063	23	8.31692e-07	2.04057	up	--	--	--	--	--	--	--	--	--	--	--	--
Gb_07369	3.7472	86	4.45834	137	3.53748	123	1.14505	54	0.607883	16	0.97115	23	0.000157983	2.03791	up	[O]	Posttranslational modification, protein turnover, chaperones	Cellular Component: nucleus (GO:0005634);; Cellular Component: cytoplasm (GO:0005737);; Molecular Function: electron carrier activity (GO:0009055);; Molecular Function: protein disulfide oxidoreductase activity (GO:0015035);; Biological Process: cell redox homeostasis (GO:0045454);; Biological Process: stamen morphogenesis (GO:0048448);; Biological Process: petal formation (GO:0048451);; Biologic…	--	--	[O]	Posttranslational modification, protein turnover, chaperones	Glutaredoxin	Glutaredoxin-C1 OS=Oryza sativa subsp. japonica (Rice) PE=3 SV=1	O	Posttranslational modification, protein turnover, chaperones	hypothetical protein AMTR_s00016p00206670 [Amborella trichopoda]
Gb_14222	5.17078	191	6.67328	330	4.85349	272	1.21637	92	1.1197	46	1.63012	61	4.63965e-07	2.03215	up	--	--	--	--	--	--	--	Late embryogenesis abundant protein	Protein YLS9 GN=F11F19.11 OS=Arabidopsis thaliana (Mouse-ear cress) PE=2 SV=1	S	Function unknown	unknown [Picea sitchensis]
Gb_17966	1.23514	97	1.32934	139	1.33655	158	0.219381	35	0.363976	31	0.348012	28	2.27189e-05	2.03069	up	--	--	Cellular Component: mitochondrion (GO:0005739);;	--	--	--	--	MYB-CC type transfactor, LHEQLE motif;; Myb-like DNA-binding domain	Myb family transcription factor APL GN=APL OS=Arabidopsis thaliana (Mouse-ear cress) PE=2 SV=2	K	Transcription	unknown [Picea sitchensis]
NG_9468	1.49518	94	2.07661	175	1.26367	120	0.25958	34	0.377877	26	0.518171	33	2.41531e-05	2.02977	up	--	--	--	--	--	--	--	--	--	S	Function unknown	unknown [Picea sitchensis]
Gb_16621	18.0134	1974	15.3075	2241	14.6006	2420	4.28616	963	3.23665	389	3.91268	432	3.17942e-17	2.02958	up	[C]	Energy production and conversion	Molecular Function: oxidoreductase activity, acting on the aldehyde or oxo group of donors, NAD or NADP as acceptor (GO:0016620);; Biological Process: oxidation-reduction process (GO:0055114);;	K12355|0|mus:103986020|K12355 coniferyl-aldehyde dehydrogenase [EC:1.2.1.68] | (RefSeq) aldehyde dehydrogenase family 2 member C4-like	Phenylpropanoid biosynthesis (ko00940)	[C]	Energy production and conversion	Aldehyde dehydrogenase family	Aldehyde dehydrogenase family 2 member B4, mitochondrial (Precursor) GN=T17F15.130 OS=Arabidopsis thaliana (Mouse-ear cress) PE=2 SV=1	C	Energy production and conversion	unknown [Picea sitchensis]
Gb_01086	38.6296	987	36.1202	1234	32.2152	1245	9.48544	496	8.27296	231	7.9944	206	5.31912e-16	2.0184	up	[TZDR]	Signal transduction mechanisms;; Cytoskeleton;; Cell cycle control, cell division, chromosome partitioning;; General function prediction only	Biological Process: cellular process (GO:0009987);; Biological Process: single-organism process (GO:0044699);; Biological Process: regulation of biological process (GO:0050789);; Biological Process: response to stimulus (GO:0050896);;	--	--	[T]	Signal transduction mechanisms	EF-hand domain pair;; EF hand;; EF-hand domain;; Caleosin related protein	Calmodulin OS=Prorocentrum minimum (Dinoflagellate) PE=2 SV=1	DTZ	Cell cycle control, cell division, chromosome partitioning;; Signal transduction mechanisms;; Cytoskeleton	hypothetical protein AMTR_s00048p00152900 [Amborella trichopoda]
Gb_33381	2.17057	338	2.40802	501	2.11873	499	0.639969	204	0.652176	111	0.315149	50	1.56531e-08	2.0134	up	--	--	Molecular Function: organic cyclic compound binding (GO:0097159);; Molecular Function: heterocyclic compound binding (GO:1901363);;	--	--	[D]	Cell cycle control, cell division, chromosome partitioning	RNA recognition motif 2;; RNA recognition motif. (a.k.a. RRM, RBD, or RNP domain);; RNA recognition motif. (a.k.a. RRM, RBD, or RNP domain);; RNA recognition motif (a.k.a. RRM, RBD, or RNP domain)	Protein terminal ear1 GN=TE1 OS=Zea mays (Maize) PE=2 SV=1	D	Cell cycle control, cell division, chromosome partitioning	terminal EAR1-like 2 [Physcomitrella patens]
Gb_06871	21.5309	3739	20.7887	4816	21.4871	5626	4.88271	1713	4.97992	948	5.72495	989	7.78417e-30	2.00855	up	--	--	--	K20246|4.74687e-60|smo:SELMODRAFT_440291|K20246 L-histidine Nalpha-methyltransferase / hercynylcysteine S-oxide synthase [EC:2.1.1.44 1.14.99.51] | (RefSeq) hypothetical protein	Histidine metabolism (ko00340)	--	--	Histidine-specific methyltransferase, SAM-dependent	--	S	Function unknown	hypothetical protein SELMODRAFT_440291 [Selaginella moellendorffii]
Gb_17492	3.62817	563	3.33993	758	3.01763	855	0.829527	327	0.96584	147	0.628196	118	1.56063e-11	2.00277	up	--	--	Biological Process: single-organism developmental process (GO:0044767);; Biological Process: system development (GO:0048731);;	K11855|1.68232e-82|pop:POPTR_0011s09750g|K11855 ubiquitin carboxyl-terminal hydrolase 36/42 [EC:3.4.19.12] | (RefSeq) POPTRDRAFT_234997; UBIQUITIN-SPECIFIC PROTEASE 15 family protein	--	[O]	Posttranslational modification, protein turnover, chaperones	Ubiquitin carboxyl-terminal hydrolase;; Ubiquitin carboxyl-terminal hydrolase	Ubiquitin carboxyl-terminal hydrolase 15 GN=UBP15 OS=Arabidopsis thaliana (Mouse-ear cress) PE=2 SV=2	O	Posttranslational modification, protein turnover, chaperones	PREDICTED: ubiquitin carboxyl-terminal hydrolase 15-like isoform X4 [Populus euphratica]
Gb_12430	0.763208	71	0.888873	110	0.826305	116	0.100814	20	0.234758	24	0.264716	25	6.35891e-05	1.99954	up	[E]	Amino acid transport and metabolism	Molecular Function: transporter activity (GO:0005215);; Biological Process: oligopeptide transport (GO:0006857);; Cellular Component: integral component of membrane (GO:0016021);;	K14638|0|pda:103715339|K14638 solute carrier family 15 (peptide/histidine transporter), member 3/4 | (RefSeq) protein NRT1/ PTR FAMILY 3.1	--	[E]	Amino acid transport and metabolism	POT family	Protein NRT1/ PTR FAMILY 3.1 GN=F24J5.19 OS=Arabidopsis thaliana (Mouse-ear cress) PE=2 SV=1	E	Amino acid transport and metabolism	unknown [Picea sitchensis]
Gb_23787	12.6964	355	9.43881	353	5.45603	231	2.03278	117	2.28827	70	2.45975	70	0.00612112	1.99602	up	--	--	--	--	--	--	--	--	--	--	--	unknown [Picea sitchensis]
Gb_26649	8.71999	187	11.0259	316	12.5351	406	2.28699	101	3.26002	77	2.31458	50	1.57935e-07	1.991	up	[O]	Posttranslational modification, protein turnover, chaperones	Cellular Component: nucleus (GO:0005634);; Cellular Component: cytoplasm (GO:0005737);; Molecular Function: electron carrier activity (GO:0009055);; Molecular Function: protein disulfide oxidoreductase activity (GO:0015035);; Biological Process: cell redox homeostasis (GO:0045454);; Biological Process: stamen morphogenesis (GO:0048448);; Biological Process: petal formation (GO:0048451);; Biologic…	K03676|3.05215e-57|vvi:100254900|K03676 glutaredoxin 3 | (RefSeq) glutaredoxin-C1	--	[O]	Posttranslational modification, protein turnover, chaperones	Glutaredoxin	Glutaredoxin-C1 OS=Oryza sativa subsp. japonica (Rice) PE=3 SV=1	O	Posttranslational modification, protein turnover, chaperones	PREDICTED: glutaredoxin-C1 [Vitis vinifera]
Gb_14376	18.7213	2131	23.4454	3551	30.7913	5260	5.34844	1249	6.82657	859	5.49498	631	1.18052e-09	1.98993	up	--	--	--	--	--	--	--	Auxin canalisation;; Plant pleckstrin homology-like region	--	S	Function unknown	PREDICTED: uncharacterized protein LOC101505664 isoform X2 [Cicer arietinum]
Gb_01171	8.72164	872	7.45386	1042	6.71808	1027	1.71101	377	2.06579	230	1.7626	181	1.64107e-14	1.98962	up	--	--	--	--	--	--	--	Protein of unknown function (DUF1298);; Wax ester synthase-like Acyl-CoA acyltransferase domain	O-acyltransferase WSD1 GN=WSD1 OS=Arabidopsis thaliana (Mouse-ear cress) PE=2 SV=1	S	Function unknown	hypothetical protein AMTR_s00021p00243800 [Amborella trichopoda]
Gb_06791	0.64376	68	0.752686	72	0.58717	89	0.062701	18	0.144173	22	0.122332	16	0.000274777	1.98944	up	[R]	General function prediction only	Biological Process: transition metal ion transport (GO:0000041);; Molecular Function: inward rectifier potassium channel activity (GO:0005242);; Biological Process: response to water deprivation (GO:0009414);; Biological Process: response to salt stress (GO:0009651);; Biological Process: potassium ion import (GO:0010107);; Cellular Component: membrane (GO:0016020);; Biological Process: cellular c…	--	--	[PT]	Inorganic ion transport and metabolism;; Signal transduction mechanisms	Ankyrin repeats (3 copies);; Ankyrin repeat;; Ankyrin repeats (many copies);; Domain of unknown function (DUF3354);; Ankyrin repeats (many copies);; Ankyrin repeat;; Cyclic nucleotide-binding domain;; Ion transport protein	Potassium channel AKT1 GN=AKT1 OS=Arabidopsis thaliana (Mouse-ear cress) PE=1 SV=2	R	General function prediction only	TPA: potassium channel 1 [Zea mays]
Gb_29400	4.31751	143	3.05009	135	2.61402	131	0.99722	68	0.861571	32	0.560816	19	0.000224975	1.98896	up	--	--	--	--	--	--	--	--	--	--	--	--
Gb_25480	3.69744	284	4.785	525	5.34731	662	0.943659	160	1.36115	105	1.17257	100	6.06677e-10	1.988	up	[R]	General function prediction only	Biological Process: metabolic process (GO:0008152);; Cellular Component: plastid (GO:0009536);; Molecular Function: hydrolase activity (GO:0016787);;	--	--	--	--	4Fe-4S single cluster domain;; Metallo-beta-lactamase superfamily;; 4Fe-4S single cluster domain	--	R	General function prediction only	unknown [Picea sitchensis]
Gb_10817	1.80895	243	1.60606	288	1.35916	276	0.32514	90	0.481302	71	0.377462	51	7.63995e-07	1.97871	up	--	--	--	--	--	--	--	AP2 domain	Ethylene-responsive transcription factor CRF2 GN=F9D16.220 OS=Arabidopsis thaliana (Mouse-ear cress) PE=1 SV=1	K	Transcription	hypothetical protein VITISV_007771 [Vitis vinifera]
Gb_17156	1.96067	120	4.80022	392	4.64158	429	1.4718	185	0	0	1.29043	80	0.0125639	1.97614	up	--	--	--	--	--	--	--	Agglutinin	--	S	Function unknown	hypothetical protein Csa_6G082530 [Cucumis sativus]
Gb_14031	1.51424	77	1.82376	124	1.94584	149	0.386397	40	0.881589	49	0.03875	2	0.000107136	1.97489	up	[R]	General function prediction only	Molecular Function: iron ion binding (GO:0005506);; Molecular Function: flavonol synthase activity (GO:0045431);; Biological Process: flavonol biosynthetic process (GO:0051555);; Biological Process: oxidation-reduction process (GO:0055114);;	K05278|3.09296e-119|cic:CICLE_v10026028mg|K05278 flavonol synthase [EC:1.14.11.23] | (RefSeq) hypothetical protein	Flavonoid biosynthesis (ko00941)	[QR]	Secondary metabolites biosynthesis, transport and catabolism;; General function prediction only	non-haem dioxygenase in morphine synthesis N-terminal;; 2OG-Fe(II) oxygenase superfamily	Flavonol synthase/flavanone 3-hydroxylase GN=FLS OS=Citrus unshiu (Satsuma mandarin) PE=1 SV=1	H	Coenzyme transport and metabolism	flavonol synthase [Ginkgo biloba]
Gb_00481	39.372	3278	30.7635	3421	30.2271	3837	6.36541	1145	10.318	958	8.08366	675	1.82861e-11	1.96516	up	--	--	Cellular Component: cytoplasmic vesicle (GO:0016023);;	--	--	--	--	X8 domain	Glucan endo-1,3-beta-glucosidase 13 (Precursor) GN=At5g56590 OS=Arabidopsis thaliana (Mouse-ear cress) PE=1 SV=1	R	General function prediction only	unknown [Picea sitchensis]
Gb_28311	2.41844	84	1.81002	84	1.41768	74	0.477333	34	0.355516	14	0.56703	20	0.000775311	1.96369	up	--	--	--	--	--	[R]	General function prediction only	Ankyrin repeats (3 copies);; Ankyrin repeats (many copies);; Ankyrin repeat	Zinc finger CCCH domain-containing protein 30 GN=At2g41900 OS=Arabidopsis thaliana (Mouse-ear cress) PE=1 SV=2	R	General function prediction only	unknown [Picea sitchensis]
Gb_28255	3.13083	242	3.74565	390	1.82516	216	0.934748	150	0.649136	56	0.574145	45	0.00145065	1.96074	up	[R]	General function prediction only	Molecular Function: O-methyltransferase activity (GO:0008171);; Biological Process: methylation (GO:0032259);;	K00545|1.21104e-64|ppp:PHYPADRAFT_229935|K00545 catechol O-methyltransferase [EC:2.1.1.6] | (RefSeq) hypothetical protein	Tyrosine metabolism (ko00350);; Betalain biosynthesis (ko00965)	[Q]	Secondary metabolites biosynthesis, transport and catabolism	O-methyltransferase	--	Q	Secondary metabolites biosynthesis, transport and catabolism	unknown [Picea sitchensis]
Gb_26380	10.6373	805	9.061	917	10.4488	1196	2.3724	368	2.5511	211	2.65357	202	2.24029e-14	1.95957	up	--	--	Molecular Function: protein binding (GO:0005515);; Cellular Component: plasma membrane (GO:0005886);; Biological Process: transport (GO:0006810);; Biological Process: response to osmotic stress (GO:0006970);; Biological Process: response to metal ion (GO:0010038);; Biological Process: cell growth (GO:0016049);; Biological Process: regulation of microtubule polymerization or depolymerization (GO:0…	--	--	--	--	DREPP plasma membrane polypeptide	Plasma membrane-associated cation-binding protein 1 GN=F1C12.180 OS=Arabidopsis thaliana (Mouse-ear cress) PE=1 SV=1	R	General function prediction only	PREDICTED: plasma membrane-associated cation-binding protein 1 [Eucalyptus grandis]
Gb_40491	10.0115	169	7.50951	170	7.8781	202	1.90042	66	2.05233	38	2.38569	42	1.77482e-05	1.9552	up	--	--	--	--	--	--	--	--	--	--	--	--
Gb_02691	7.18274	644	5.776	692	5.89422	799	1.29757	238	2.03762	200	1.45234	131	7.85173e-12	1.94911	up	[GC]	Carbohydrate transport and metabolism;; Energy production and conversion	Biological Process: metabolic process (GO:0008152);; Molecular Function: UDP-glucosyltransferase activity (GO:0035251);;	--	--	[GC]	Carbohydrate transport and metabolism;; Energy production and conversion	UDP-glucoronosyl and UDP-glucosyl transferase	Scopoletin glucosyltransferase GN=TOGT1 OS=Nicotiana tabacum (Common tobacco) PE=1 SV=1	CG	Energy production and conversion;; Carbohydrate transport and metabolism	unknown [Picea sitchensis]
Gb_10965	24.9577	509	18.7655	511	17.0469	525	5.54571	232	5.52477	123	4.32448	89	1.04323e-06	1.9469	up	--	--	Cellular Component: mitochondrion (GO:0005739);;	--	--	--	--	X8 domain	Glucan endo-1,3-beta-glucosidase 4 (Precursor) GN=At3g13560 OS=Arabidopsis thaliana (Mouse-ear cress) PE=1 SV=1	R	General function prediction only	hypothetical protein PHAVU_003G290300g [Phaseolus vulgaris]
Gb_03009	1.43679	149	0.952682	133	0.974365	152	0.264623	56	0.249161	38	0.250125	27	8.0775e-05	1.94571	up	--	--	--	--	--	--	--	B3 DNA binding domain	B3 domain-containing transcription factor FUS3 GN=FUS3 OS=Arabidopsis thaliana (Mouse-ear cress) PE=2 SV=2	K	Transcription	PREDICTED: B3 domain-containing transcription factor FUS3-like isoform X1 [Nelumbo nucifera]
Gb_27802	0.672701	60	0.712731	85	1.02091	137	0.17277	32	0.135875	14	0.289223	26	0.000210067	1.94441	up	[O]	Posttranslational modification, protein turnover, chaperones	Molecular Function: nucleotide binding (GO:0000166);;	K08900|0|vvi:100263212|K08900 mitochondrial chaperone BCS1 | (RefSeq) AAA-ATPase At4g25835	--	[O]	Posttranslational modification, protein turnover, chaperones	Domain associated at C-terminal with AAA;; ATPase family associated with various cellular activities (AAA)	26S protease regulatory subunit 6A homolog OS=Oryza sativa subsp. japonica (Rice) PE=2 SV=2	O	Posttranslational modification, protein turnover, chaperones	PREDICTED: uncharacterized protein LOC104597594 [Nelumbo nucifera]
Gb_27814	23.5551	1022	12.3736	725	11.7374	789	4.42611	366	4.84684	234	3.30952	144	0.0132032	1.93697	up	--	--	--	--	--	--	--	--	--	--	--	--
Gb_06892	42.0524	1096	48.1649	1678	46.7926	1844	13.4781	719	10.7643	307	10.6338	279	6.92996e-18	1.93183	up	--	--	--	--	--	--	--	Extensin-like region	--	--	--	--
Gb_26447	0.932199	89	0.924592	118	0.652539	94	0.23307	46	0.220563	23	0.185881	18	0.000515737	1.92957	up	--	--	--	--	--	--	--	--	Probable mediator of RNA polymerase II transcription subunit 19b GN=F7K24.230 OS=Arabidopsis thaliana (Mouse-ear cress) PE=2 SV=1	K	Transcription	PREDICTED: mediator of RNA polymerase II transcription subunit 19a-like isoform X2 [Eucalyptus grandis]
Gb_39935	495.006	43901	510.339	60504	521.587	69957	129.582	23527	122.659	11885	139.789	12466	6.76019e-31	1.9266	up	[G]	Carbohydrate transport and metabolism	Molecular Function: hydrolase activity, hydrolyzing O-glycosyl compounds (GO:0004553);; Biological Process: carbohydrate metabolic process (GO:0005975);;	K01188|0|cam:101513528|K01188 beta-glucosidase [EC:3.2.1.21] | (RefSeq) beta-glucosidase 12-like	Cyanoamino acid metabolism (ko00460);; Starch and sucrose metabolism (ko00500);; Phenylpropanoid biosynthesis (ko00940)	[G]	Carbohydrate transport and metabolism	Glycosyl hydrolase family 1	Beta-glucosidase 24 (Precursor) OS=Oryza sativa subsp. japonica (Rice) PE=2 SV=1	G	Carbohydrate transport and metabolism	hypothetical protein JCGZ_07925 [Jatropha curcas]
Gb_04059	0.307738	58	0.424027	106	0.37649	106	0.127258	49	0.124919	26	0.021559	5	0.000961169	1.92582	up	--	--	--	--	--	--	--	--	--	R	General function prediction only	hypothetical protein AMTR_s00009p00215160 [Amborella trichopoda]
Gb_10165	10.8509	950	10.5517	1234	10.9379	1448	2.94538	528	3.19783	306	2.1575	190	1.57212e-15	1.92391	up	[S]	Function unknown	Molecular Function: catalytic activity (GO:0003824);;	--	--	[R]	General function prediction only	Leucine rich repeat;; Leucine Rich repeats (2 copies);; Leucine Rich Repeat;; Leucine Rich repeat	Protein TOO MANY MOUTHS (Precursor) GN=F18B13.16 OS=Arabidopsis thaliana (Mouse-ear cress) PE=1 SV=1	R	General function prediction only	hypothetical protein AMTR_s00051p00071560 [Amborella trichopoda]
Gb_40389	0.661743	72	0.76449	126	0.719205	116	0.199623	44	0.055395	8	0.257341	34	0.000273309	1.92126	up	[R]	General function prediction only	--	--	--	[R]	General function prediction only	Ankyrin repeats (3 copies);; Ankyrin repeat;; Ankyrin repeats (many copies);; Ankyrin repeats (many copies);; Ankyrin repeat;; Domain of unknown function	Ankyrin repeat-containing protein At3g12360 GN=At3g12360 OS=Arabidopsis thaliana (Mouse-ear cress) PE=2 SV=1	R	General function prediction only	PREDICTED: ankyrin repeat-containing protein At5g02620-like [Nelumbo nucifera]
Gb_31794	0.580795	84	1.27064	245	0.563907	123	0.282782	84	0.21218	34	0.112795	17	0.0326107	1.91924	up	--	--	--	--	--	[R]	General function prediction only	PPR repeat family;; PPR repeat;; PPR repeat;; Pentatricopeptide repeat domain;; DYW family of nucleic acid deaminases;; Tetratricopeptide repeat;; Tetratricopeptide repeat;; Tetratricopeptide repeat	Pentatricopeptide repeat-containing protein At2g22070 GN=PCMP-H41 OS=Arabidopsis thaliana (Mouse-ear cress) PE=3 SV=1	R	General function prediction only	PREDICTED: putative pentatricopeptide repeat-containing protein At1g68930 [Nelumbo nucifera]
Gb_16611	7.92326	946	5.22842	834	5.41656	978	1.7303	423	1.6295	213	1.45237	175	3.05681e-05	1.91547	up	[E]	Amino acid transport and metabolism	Molecular Function: oxidoreductase activity (GO:0016491);; Biological Process: oxidation-reduction process (GO:0055114);;	K00306|8.16198e-158|ppp:PHYPADRAFT_194238|K00306 sarcosine oxidase / L-pipecolate oxidase [EC:1.5.3.1 1.5.3.7] | (RefSeq) hypothetical protein	Glycine, serine and threonine metabolism (ko00260);; Lysine degradation (ko00310);; Peroxisome (ko04146)	[R]	General function prediction only	FAD dependent oxidoreductase;; NAD(P)-binding Rossmann-like domain;; 3-hydroxyacyl-CoA dehydrogenase, NAD binding domain	Probable sarcosine oxidase GN=At2g24580 OS=Arabidopsis thaliana (Mouse-ear cress) PE=2 SV=1	R	General function prediction only	unknown [Picea sitchensis]
Gb_03770	86.2858	11558	62.9905	11291	52.7732	10684	19.2575	5270	17.738	2601	15.6263	2106	7.98514e-05	1.91168	up	[M]	Cell wall/membrane/envelope biogenesis	Cellular Component: membrane (GO:0016020);; Molecular Function: transferase activity, transferring glycosyl groups (GO:0016757);;	--	--	--	--	Cellulose synthase;; Glycosyl transferase family group 2	Cellulose synthase-like protein H1 GN=OSJNBa0035F15.9 OS=Oryza sativa subsp. japonica (Rice) PE=2 SV=2	S	Function unknown	unknown [Picea sitchensis]
Gb_31200	10.3295	1381	12.4171	2268	13.6677	2745	3.00597	746	4.29554	647	1.95166	314	3.49639e-21	1.9101	up	--	--	Cellular Component: cytoplasm (GO:0005737);; Molecular Function: terpene synthase activity (GO:0010333);; Biological Process: monoterpene biosynthetic process (GO:0043693);; Biological Process: cellular response to jasmonic acid stimulus (GO:0071395);;	K18108|1.11576e-80|vvi:100232956|K18108 (-)-alpha-terpineol synthase [EC:4.2.3.111] | (RefSeq) (-)-a-terpineol synthase	Monoterpenoid biosynthesis (ko00902)	--	--	Terpene synthase family, metal binding domain;; Terpene synthase, N-terminal domain	Longifolene synthase GN=TPS-Lon OS=Picea abies (Norway spruce) PE=1 SV=1	R	General function prediction only	alpha pinene synthase [Chamaecyparis formosensis]
Gb_36305	3.64203	648	4.58674	1090	4.35343	1171	1.02419	373	1.24218	242	0.996921	179	6.51064e-14	1.90673	up	[V]	Defense mechanisms	Biological Process: regulation of animal organ formation (GO:0003156);; Biological Process: drug transmembrane transport (GO:0006855);; Molecular Function: drug transmembrane transporter activity (GO:0015238);; Molecular Function: antiporter activity (GO:0015297);; Cellular Component: membrane (GO:0016020);; Cellular Component: Golgi transport complex (GO:0017119);; Biological Process: iron ion h…	K03327|0|smo:SELMODRAFT_53188|K03327 multidrug resistance protein, MATE family | (RefSeq) hypothetical protein	--	[R]	General function prediction only	MatE	MATE efflux family protein DTX1 GN=F3L12.13 OS=Arabidopsis thaliana (Mouse-ear cress) PE=2 SV=1	S	Function unknown	hypothetical protein SELMODRAFT_63250, partial [Selaginella moellendorffii]
Gb_24618	5.81233	827	4.50091	856	3.56336	769	1.30486	374	1.30354	189	1.10615	162	2.80334e-05	1.90599	up	[E]	Amino acid transport and metabolism	Biological Process: transport (GO:0006810);; Cellular Component: membrane (GO:0016020);;	K14638|0|pmum:103339078|K14638 solute carrier family 15 (peptide/histidine transporter), member 3/4 | (RefSeq) protein NRT1/ PTR FAMILY 5.10-like	--	[E]	Amino acid transport and metabolism	POT family	Protein NRT1/ PTR FAMILY 5.10 GN=NPF5.10 OS=Arabidopsis thaliana (Mouse-ear cress) PE=2 SV=1	E	Amino acid transport and metabolism	unknown [Picea sitchensis]
Gb_27192	6.89487	1176	8.1735	1863	7.80204	2012	2.18248	762	1.8202	339	1.93204	332	9.77984e-19	1.9057	up	--	--	Biological Process: MAPK cascade (GO:0000165);; Molecular Function: nucleotide binding (GO:0000166);; Molecular Function: protein serine/threonine kinase activity (GO:0004674);; Biological Process: protein phosphorylation (GO:0006468);; Cellular Component: membrane (GO:0016020);; Molecular Function: oxidoreductase activity (GO:0016491);;	--	--	--	--	Protein kinase domain;; Protein tyrosine kinase;; Leucine Rich repeats (2 copies);; Leucine rich repeat;; Leucine Rich Repeat;; Leucine rich repeat N-terminal domain;; Leucine Rich repeat;; Leucine rich repeat	Leucine-rich repeat receptor-like serine/threonine-protein kinase BAM1 (Precursor) GN=BAM1 OS=Arabidopsis thaliana (Mouse-ear cress) PE=1 SV=1	T	Signal transduction mechanisms	PREDICTED: leucine-rich repeat receptor-like serine/threonine-protein kinase BAM1 [Musa acuminata subsp. malaccensis]
Gb_18671	1.35649	114	1.38722	156	1.20273	153	0.480835	83	0.266331	25	0.263459	23	0.00031913	1.89909	up	[KAD]	Transcription;; RNA processing and modification;; Cell cycle control, cell division, chromosome partitioning	Molecular Function: DNA binding (GO:0003677);; Molecular Function: chromatin binding (GO:0003682);;	K09422|9.74253e-78|tcc:TCM_024180|K09422 myb proto-oncogene protein, plant | (RefSeq) Myb domain protein 5 isoform 1	--	[K]	Transcription	Myb-like DNA-binding domain;; Myb-like DNA-binding domain	Transcription repressor MYB5 GN=MYB5 OS=Arabidopsis thaliana (Mouse-ear cress) PE=1 SV=1	K	Transcription	Myb domain protein 5 isoform 2, partial [Theobroma cacao]
Gb_03545	0.307424	46	0.562263	111	0.653745	146	0.139575	43	0.081768	14	0.163654	25	0.000294651	1.89626	up	--	--	--	--	--	[R]	General function prediction only	PPR repeat family;; PPR repeat;; PPR repeat;; Pentatricopeptide repeat domain	Pentatricopeptide repeat-containing protein At3g57430, chloroplastic (Precursor) GN=PCMP-H81 OS=Arabidopsis thaliana (Mouse-ear cress) PE=2 SV=2	R	General function prediction only	PREDICTED: pentatricopeptide repeat-containing protein At4g21300 [Phoenix dactylifera]
Gb_12367	23.4659	2231	34.0145	4323	41.295	5938	9.27789	1806	10.0614	1046	6.44212	616	7.4296e-07	1.89084	up	[Q]	Secondary metabolites biosynthesis, transport and catabolism	Molecular Function: monooxygenase activity (GO:0004497);; Molecular Function: iron ion binding (GO:0005506);; Molecular Function: electron carrier activity (GO:0009055);; Molecular Function: oxidoreductase activity, acting on paired donors, with incorporation or reduction of molecular oxygen (GO:0016705);; Molecular Function: heme binding (GO:0020037);; Biological Process: shoot system developmen…	K20619|0|vvi:100257640|K20619 cytochrome P450 family 78 subfamily A | (RefSeq) cytochrome P450 78A7	--	[Q]	Secondary metabolites biosynthesis, transport and catabolism	Cytochrome P450	Cytochrome P450 78A4 GN=CYP78A4 OS=Pinus radiata (Monterey pine) PE=2 SV=1	Q	Secondary metabolites biosynthesis, transport and catabolism	RecName: Full=Cytochrome P450 78A4 [Pinus radiata]
NG_21139	1.91896	104	1.08439	79	0.897936	74	0.296415	33	0.266088	16	0.477035	26	0.0157312	1.88851	up	[O]	Posttranslational modification, protein turnover, chaperones	--	--	--	[O]	Posttranslational modification, protein turnover, chaperones	Hsp20/alpha crystallin family	15.4 kDa class V heat shock protein OS=Arabidopsis thaliana OX=3702 GN=HSP15.4 PE=2 SV=1	O	Posttranslational modification, protein turnover, chaperones	FK506-binding protein 5 [Amborella trichopoda]
Gb_36633	46.775	3401	46.1504	4485	45.9836	5056	15.3548	2286	12.9722	1031	8.19862	600	1.29919e-23	1.88415	up	[R]	General function prediction only	Molecular Function: nucleotide binding (GO:0000166);; Molecular Function: double-stranded DNA binding (GO:0003690);; Molecular Function: single-stranded DNA binding (GO:0003697);; Cellular Component: cell wall (GO:0005618);; Cellular Component: nucleolus (GO:0005730);; Cellular Component: peroxisome (GO:0005777);; Cellular Component: plasma membrane (GO:0005886);; Biological Process: mRNA export …	--	--	[R]	General function prediction only	RNA recognition motif. (a.k.a. RRM, RBD, or RNP domain);; RNA recognition motif (a.k.a. RRM, RBD, or RNP domain);; RNA recognition motif. (a.k.a. RRM, RBD, or RNP domain)	Glycine-rich RNA-binding protein GRP1A OS=Sinapis alba (White mustard) PE=2 SV=1	A	RNA processing and modification	PREDICTED: glycine-rich RNA-binding protein GRP1A-like [Nelumbo nucifera]
Gb_11219	0.649289	87	0.420857	76	0.525421	107	0.213968	59	0.103311	16	0.089671	13	0.00212418	1.88405	up	--	--	--	--	--	[R]	General function prediction only	PPR repeat family;; PPR repeat;; PPR repeat;; Pentatricopeptide repeat domain;; DYW family of nucleic acid deaminases;; Region in Clathrin and VPS;; Tetratricopeptide repeat;; Tetratricopeptide repeat	Pentatricopeptide repeat-containing protein At1g11290 GN=T28P6.20 OS=Arabidopsis thaliana (Mouse-ear cress) PE=2 SV=1	R	General function prediction only	unknown [Picea sitchensis]
NG_13365	1.3077	84	1.57005	134	1.49992	145	0.280787	37	0.395653	28	0.477309	31	0.000105879	1.88066	up	--	--	Molecular Function: DNA binding (GO:0003677);; Cellular Component: nucleus (GO:0005634);; Biological Process: cell proliferation (GO:0008283);; Biological Process: flower development (GO:0009908);; Biological Process: adaxial/abaxial axis specification (GO:0009943);; Biological Process: centrolateral axis specification (GO:0009947);; Biological Process: stipule development (GO:0010865);; Biologic…	--	--	--	--	Homeobox domain	WUSCHEL-related homeobox 3 OS=Arabidopsis thaliana OX=3702 GN=WOX3 PE=1 SV=1	--	--	putative wuschel homeobox protein WOX3B [Ginkgo biloba]
Gb_29620	1.31896	87	1.10682	83	1.06563	89	0.379818	49	0.324614	20	0.225481	13	0.00181599	1.87785	up	--	--	--	--	--	--	--	--	--	--	--	--
Gb_11786	12.9905	413	7.85632	334	5.3339	257	2.23584	146	2.43016	85	2.34425	75	0.0260079	1.87686	up	--	--	--	--	--	--	--	--	--	--	--	--
Gb_35949	21.7945	591	22.4342	813	24.013	984	5.60624	311	6.46212	192	6.12864	167	7.34255e-12	1.87138	up	[T]	Signal transduction mechanisms	Biological Process: transition metal ion transport (GO:0000041);; Biological Process: phosphorelay signal transduction system (GO:0000160);; Cellular Component: nucleus (GO:0005634);; Cellular Component: cytoplasm (GO:0005737);; Biological Process: embryo sac development (GO:0009553);; Molecular Function: histidine phosphotransfer kinase activity (GO:0009927);; Biological Process: regulation of s…	K14490|9.86318e-73|tcc:TCM_026508|K14490 histidine-containing phosphotransfer peotein | (RefSeq) Histidine-containing phosphotransfer protein 1 isoform 1	Plant hormone signal transduction (ko04075)	[T]	Signal transduction mechanisms	Hpt domain	Histidine-containing phosphotransfer protein 1 GN=MIL23.8 OS=Arabidopsis thaliana (Mouse-ear cress) PE=1 SV=1	T	Signal transduction mechanisms	unknown [Picea sitchensis]
Gb_14768	0.576894	68	0.389434	62	0.42257	76	0.085573	21	0.241063	31	0.044556	6	0.00124072	1.86023	up	--	--	--	--	--	[R]	General function prediction only	PPR repeat family;; PPR repeat;; PPR repeat;; Pentatricopeptide repeat domain;; Replication factor C C-terminal domain	Putative pentatricopeptide repeat-containing protein At5g43820 GN=At5g43820 OS=Arabidopsis thaliana (Mouse-ear cress) PE=3 SV=1	R	General function prediction only	PREDICTED: putative pentatricopeptide repeat-containing protein At5g43820 [Nelumbo nucifera]
Gb_02561	1.75318	263	2.1266	427	1.5306	348	0.650001	200	0.532901	88	0.256191	39	2.91686e-06	1.8599	up	--	--	Biological Process: meiotic cell cycle (GO:0007126);; Biological Process: nucleic acid metabolic process (GO:0090304);;	--	--	[R]	General function prediction only	PPR repeat family;; PPR repeat;; PPR repeat;; Pentatricopeptide repeat domain;; DYW family of nucleic acid deaminases	Pentatricopeptide repeat-containing protein DOT4, chloroplastic {ECO:0000305} (Precursor) GN=At4g18750 OS=Arabidopsis thaliana (Mouse-ear cress) PE=2 SV=1	R	General function prediction only	unknown [Picea sitchensis]
Gb_00709	32.3006	4234	25.9425	4546	27.9546	5542	8.13362	2183	8.56263	1227	6.53847	862	3.10869e-16	1.85729	up	--	--	Biological Process: ethylene-activated signaling pathway (GO:0009873);; Molecular Function: transferase activity, transferring glycosyl groups (GO:0016757);;	--	--	[GC]	Carbohydrate transport and metabolism;; Energy production and conversion	UDP-glucoronosyl and UDP-glucosyl transferase	UDP-glycosyltransferase 86A1 GN=UGT86A1 OS=Arabidopsis thaliana (Mouse-ear cress) PE=2 SV=1	CG	Energy production and conversion;; Carbohydrate transport and metabolism	hypothetical protein PRUPE_ppa004816mg [Prunus persica]
Gb_14361	37.6931	2177	53.2499	4126	53.1587	4583	8.50662	1333	16.3907	1072	7.7235	601	1.34529e-13	1.85679	up	--	--	Cellular Component: extracellular region (GO:0005576);; Biological Process: syncytium formation (GO:0006949);; Biological Process: sexual reproduction (GO:0019953);;	--	--	--	--	Pollen allergen;; Rare lipoprotein A (RlpA)-like double-psi beta-barrel	Expansin-B17 (Precursor) OS=Oryza sativa subsp. japonica (Rice) PE=3 SV=2	R	General function prediction only	unknown [Picea sitchensis]
Gb_16635	3.40414	414	2.5096	408	3.35634	617	0.753659	188	1.00193	133	0.747686	92	1.86996e-08	1.85427	up	--	--	--	--	--	[R]	General function prediction only	PPR repeat;; PPR repeat family;; PPR repeat;; Pentatricopeptide repeat domain;; DYW family of nucleic acid deaminases;; Tetratricopeptide repeat;; Tetratricopeptide repeat;; Tetratricopeptide repeat	Pentatricopeptide repeat-containing protein At4g02750 GN=PCMP-H24 OS=Arabidopsis thaliana (Mouse-ear cress) PE=3 SV=1	R	General function prediction only	unknown [Picea sitchensis]
Gb_31675	8.10137	1046	7.59869	1305	6.74014	1315	1.68962	445	2.53545	356	1.87054	243	1.35981e-15	1.85317	up	--	--	--	K10999|1.70239e-150|cic:CICLE_v10007321mg|K10999 cellulose synthase A [EC:2.4.1.12] | (RefSeq) hypothetical protein	--	--	--	Cellulose synthase;; Glycosyltransferase like family 2;; Glycosyl transferase family group 2	Cellulose synthase A catalytic subunit 7 [UDP-forming] GN=T10B6.80 OS=Arabidopsis thaliana (Mouse-ear cress) PE=1 SV=1	O	Posttranslational modification, protein turnover, chaperones	PREDICTED: cellulose synthase-like protein H1 isoform X1 [Nelumbo nucifera]
NG_21411	4.12331	479	5.94803	908	6.38156	1095	1.21793	275	2.36126	248	1.27189	149	2.91863e-11	1.84846	up	--	--	--	--	--	--	--	--	--	--	--	--
Gb_07317	19.627	2671	17.0407	3100	15.2327	3135	5.72541	1595	5.08533	757	3.2232	442	1.62811e-10	1.84803	up	[Q]	Secondary metabolites biosynthesis, transport and catabolism	Molecular Function: monooxygenase activity (GO:0004497);; Molecular Function: iron ion binding (GO:0005506);; Molecular Function: electron carrier activity (GO:0009055);; Molecular Function: oxidoreductase activity, acting on paired donors, with incorporation or reduction of molecular oxygen (GO:0016705);; Molecular Function: heme binding (GO:0020037);; Biological Process: oxidation-reduction pro…	--	--	[Q]	Secondary metabolites biosynthesis, transport and catabolism	Cytochrome P450	Cytochrome P450 78A4 GN=CYP78A4 OS=Pinus radiata (Monterey pine) PE=2 SV=1	Q	Secondary metabolites biosynthesis, transport and catabolism	unknown [Picea sitchensis]
Gb_34191	76.2836	5529	79.9715	7748	103.452	11338	30.8248	4573	17.8789	1416	21.5266	1569	1.46879e-12	1.83959	up	--	--	Biological Process: fatty acid biosynthetic process (GO:0006633);; Cellular Component: chloroplast (GO:0009507);; Molecular Function: acyl-[acyl-carrier-protein] desaturase activity (GO:0045300);; Molecular Function: transition metal ion binding (GO:0046914);; Biological Process: oxidation-reduction process (GO:0055114);;	--	--	--	--	Fatty acid desaturase	Acyl-[acyl-carrier-protein] desaturase, chloroplastic (Precursor) OS=Ricinus communis (Castor bean) PE=1 SV=1	I	Lipid transport and metabolism	stearoyl-ACP desaturase [Ginkgo biloba]
Gb_38560	2.27682	117	2.54834	175	1.28013	100	0.627439	66	0.461179	26	0.571193	30	0.00129987	1.83888	up	--	--	--	--	--	--	--	CP12 domain	Calvin cycle protein CP12-3, chloroplastic (Precursor) GN=CP12-3 OS=Arabidopsis thaliana (Mouse-ear cress) PE=1 SV=1	R	General function prediction only	unknown [Picea sitchensis]
Gb_14786	7.94834	390	8.28546	543	8.39404	623	2.3444	236	2.49874	134	1.84972	92	1.91001e-08	1.83719	up	[O]	Posttranslational modification, protein turnover, chaperones	--	K19040|1.10178e-32|gmx:100787273|K19040 E3 ubiquitin-protein ligase ATL10/75/76/77/78 [EC:2.3.2.27] | (RefSeq) RING-H2 finger protein ATL74-like	--	[O]	Posttranslational modification, protein turnover, chaperones	Ring finger domain;; RING-H2 zinc finger;; Zinc finger, C3HC4 type (RING finger);; Zinc finger, C3HC4 type (RING finger);; Zinc finger, C3HC4 type (RING finger);; Anaphase-promoting complex subunit 11 RING-H2 finger	RING-H2 finger protein ATL73 (Precursor) GN=ATL73 OS=Arabidopsis thaliana (Mouse-ear cress) PE=2 SV=1	O	Posttranslational modification, protein turnover, chaperones	PREDICTED: RING-H2 finger protein ATL72-like [Glycine max]
Gb_16955	2.49046	327	2.45674	431	2.03623	404	0.140667	38	1.11037	159	0.684862	91	5.45441e-08	1.83527	up	--	--	--	--	--	[R]	General function prediction only	PPR repeat family;; PPR repeat;; PPR repeat;; Pentatricopeptide repeat domain;; DYW family of nucleic acid deaminases;; Tetratricopeptide repeat;; Tetratricopeptide repeat	Pentatricopeptide repeat-containing protein At1g11290 GN=T28P6.20 OS=Arabidopsis thaliana (Mouse-ear cress) PE=2 SV=1	R	General function prediction only	unknown [Picea sitchensis]
Gb_30961	6.75005	627	5.71656	652	6.14334	827	1.79665	302	1.62653	144	2.28373	178	2.64867e-10	1.83421	up	--	--	Biological Process: maltose metabolic process (GO:0000023);; Biological Process: phosphatidylglycerol biosynthetic process (GO:0006655);; Biological Process: embryo development ending in seed dormancy (GO:0009793);; Biological Process: thylakoid membrane organization (GO:0010027);; Biological Process: stomatal complex morphogenesis (GO:0010103);; Biological Process: iron-sulfur cluster assembly (…	--	--	--	--	--	--	S	Function unknown	hypothetical protein AMTR_s00058p00093170 [Amborella trichopoda]
Gb_20888	1.5421	280	1.75595	426	1.38657	381	0.520906	186	0.357483	72	0.414555	76	1.23664e-06	1.83394	up	--	--	Biological Process: primary metabolic process (GO:0044238);; Biological Process: cellular biosynthetic process (GO:0044249);; Biological Process: organic substance biosynthetic process (GO:1901576);;	--	--	[U]	Intracellular trafficking, secretion, and vesicular transport	EXS family;; SPX domain	Phosphate transporter PHO1 homolog 1 OS=Arabidopsis thaliana (Mouse-ear cress) PE=2 SV=1	P	Inorganic ion transport and metabolism	hypothetical protein AMTR_s00024p00253180 [Amborella trichopoda]
Gb_07049	39.1567	7598	38.7301	10201	35.9994	10694	9.08952	3711	11.2418	2420	10.7822	2126	3.4254e-28	1.82939	up	--	--	Molecular Function: DNA binding (GO:0003677);; Molecular Function: transcription factor activity, sequence-specific DNA binding (GO:0003700);; Cellular Component: nucleus (GO:0005634);; Biological Process: regulation of transcription, DNA-templated (GO:0006355);;	K09285|1.22329e-169|vvi:100252316|K09285 AP2-like factor, ANT lineage | (RefSeq) AP2-like ethylene-responsive transcription factor ANT	--	--	--	AP2 domain	AP2-like ethylene-responsive transcription factor AIL1 GN=AIL1 OS=Arabidopsis thaliana (Mouse-ear cress) PE=2 SV=1	K	Transcription	AINTEGUMENTA-like protein [Pinus thunbergii]
Gb_02822	0.877775	104	0.826186	131	0.802388	144	0.29739	72	0.238346	31	0.147268	18	0.000646904	1.82564	up	[E]	Amino acid transport and metabolism	--	--	--	[E]	Amino acid transport and metabolism	POT family	Protein NRT1/ PTR FAMILY 4.6 GN=At1g69850 OS=Arabidopsis thaliana (Mouse-ear cress) PE=1 SV=1	P	Inorganic ion transport and metabolism	hypothetical protein AMTR_s00169p00048300 [Amborella trichopoda]
Gb_19063	3.09591	289	2.42823	303	2.20274	311	0.57154	110	0.881451	90	0.691224	65	1.97974e-06	1.82085	up	[S]	Function unknown	Biological Process: single-organism process (GO:0044699);;	--	--	[R]	General function prediction only	Leucine Rich repeats (2 copies);; Leucine rich repeat;; Leucine Rich Repeat;; Leucine rich repeat;; Leucine Rich repeat	Protein TOO MANY MOUTHS (Precursor) GN=F18B13.16 OS=Arabidopsis thaliana (Mouse-ear cress) PE=1 SV=1	R	General function prediction only	hypothetical protein AMTR_s00007p00257820 [Amborella trichopoda]
Gb_07226	35.3862	5032	25.0712	4765	21.4907	4621	7.09415	2065	9.01554	1401	6.70068	958	0.000177486	1.81962	up	--	--	Molecular Function: DNA binding (GO:0003677);; Molecular Function: transcription factor activity, sequence-specific DNA binding (GO:0003700);; Cellular Component: nucleus (GO:0005634);; Biological Process: regulation of transcription, DNA-templated (GO:0006355);;	K09286|6.86504e-25|sly:543910|K09286 EREBP-like factor | (RefSeq) JERF3	--	--	--	AP2 domain	Ethylene-responsive transcription factor 1 GN=OJ1311_D08.9 OS=Oryza sativa subsp. japonica (Rice) PE=1 SV=1	K	Transcription	unknown [Picea sitchensis]
Gb_26894	1.64576	101	1.89309	155	1.27587	118	0.381935	48	0.391441	27	0.553901	34	0.000254386	1.81958	up	--	--	Molecular Function: transcription factor activity, sequence-specific DNA binding (GO:0003700);; Cellular Component: nucleus (GO:0005634);; Biological Process: regulation of transcription, DNA-templated (GO:0006355);; Biological Process: anthocyanin-containing compound biosynthetic process (GO:0009718);; Molecular Function: sequence-specific DNA binding (GO:0043565);;	--	--	--	--	WRKY DNA -binding domain	Probable WRKY transcription factor 12 GN=WRKY12 OS=Arabidopsis thaliana (Mouse-ear cress) PE=2 SV=1	K	Transcription	hypothetical protein EUGRSUZ_D01219 [Eucalyptus grandis]
Gb_10908	2.17201	339	2.34907	490	1.84382	435	0.385576	123	0.800723	137	0.586398	92	3.52112e-08	1.81769	up	--	--	--	--	--	[R]	General function prediction only	PPR repeat;; PPR repeat family;; PPR repeat;; Pentatricopeptide repeat domain;; DYW family of nucleic acid deaminases;; Tetratricopeptide repeat;; Tetratricopeptide repeat;; Vacuolar sorting protein 39 domain 1	Putative pentatricopeptide repeat-containing protein At2g01510 OS=Arabidopsis thaliana (Mouse-ear cress) PE=3 SV=1	R	General function prediction only	PREDICTED: pentatricopeptide repeat-containing protein At4g21065 [Nelumbo nucifera]
Gb_39098	15.0822	366	12.7625	413	11.7785	449	2.7064	122	4.23176	111	3.98881	111	5.17255e-08	1.81755	up	--	--	Molecular Function: binding (GO:0005488);;	--	--	--	--	Myb-like DNA-binding domain;; Myb-like DNA-binding domain	Transcription factor CPC GN=CPC OS=Arabidopsis thaliana (Mouse-ear cress) PE=1 SV=1	K	Transcription	unknown [Picea sitchensis]
Gb_38905	33.6193	3365	31.0596	4156	27.9697	4234	8.38762	1719	8.84295	967	8.54652	860	2.8888e-23	1.81436	up	--	--	--	--	--	--	--	--	--	S	Function unknown	unknown [Picea sitchensis]
Gb_34103	44.7316	2293	24.8948	1816	35.9487	2422	12.3569	983	8.61302	452	14.522	578	0.000311304	1.8128	up	--	--	Molecular Function: DNA binding (GO:0003677);; Molecular Function: transcription factor activity, sequence-specific DNA binding (GO:0003700);; Cellular Component: nucleus (GO:0005634);; Biological Process: regulation of transcription, DNA-templated (GO:0006355);; Biological Process: signal transduction (GO:0007165);; Biological Process: meristem maintenance (GO:0010073);; Biological Process: memb…	K09260|9.17988e-56|vvi:100251508|K09260 MADS-box transcription enhancer factor 2A | (RefSeq) MADS-box protein SVP	--	[K]	Transcription	SRF-type transcription factor (DNA-binding and dimerisation domain);; K-box region	MADS-box protein JOINTLESS GN=J OS=Solanum lycopersicum (Tomato) PE=1 SV=1	K	Transcription	unknown [Picea sitchensis]
Gb_09939	42.1093	1923	28.869	1761	27.3976	1891	8.04022	748	10.6767	528	8.98619	412	5.06613e-05	1.81143	up	--	--	--	--	--	--	--	--	--	--	--	--
Gb_16497	1.60841	334	1.63377	477	1.43239	478	0.461089	193	0.409763	102	0.395853	93	1.76051e-07	1.81118	up	--	--	Biological Process: response to stimulus (GO:0050896);;	--	--	--	--	NPH3 family;; BTB/POZ domain	BTB/POZ domain-containing protein At1g30440 GN=At1g30440 OS=Arabidopsis thaliana (Mouse-ear cress) PE=1 SV=2	R	General function prediction only	unknown [Picea sitchensis]
Gb_02528	15.187	1567	14.0012	1934	14.5952	2279	3.45579	728	4.56258	509	4.30823	443	1.23021e-19	1.81092	up	--	--	--	--	--	[I]	Lipid transport and metabolism	CRAL/TRIO domain;; CRAL/TRIO, N-terminal domain;; Divergent CRAL/TRIO domain	Patellin-4 GN=PATL4 OS=Arabidopsis thaliana (Mouse-ear cress) PE=1 SV=2	I	Lipid transport and metabolism	unknown [Picea sitchensis]
Gb_27227	1.73185	166	2.11662	278	1.64809	239	0.468335	89	0.635595	54	0.583349	56	1.35542e-05	1.80839	up	--	--	--	--	--	--	--	Remorin, C-terminal region	Uncharacterized protein At3g61260 GN=At3g61260 OS=Arabidopsis thaliana (Mouse-ear cress) PE=1 SV=1	S	Function unknown	unknown [Picea sitchensis]
Gb_17250	4.68281	442	4.81026	606	5.9356	846	1.87407	362	0.958622	99	1.43118	136	9.33775e-09	1.80738	up	--	--	Biological Process: transcription, DNA-templated (GO:0006351);;	--	--	--	--	GRAS domain family	Protein SHORT-ROOT GN=F19F18.140 OS=Arabidopsis thaliana (Mouse-ear cress) PE=1 SV=1	K	Transcription	short-root [Pinus radiata]
Gb_04724	58.3066	1882	60.8347	2624	62.2474	3038	20.3749	1346	11.7895	416	18.2891	594	7.51969e-20	1.80496	up	--	--	Biological Process: multicellular organism development (GO:0007275);;	--	--	--	--	--	--	K	Transcription	unknown [Picea sitchensis]
Gb_02573	1.45719	205	1.05859	199	1.0015	213	0.348129	100	0.3229	50	0.317284	45	6.90739e-05	1.79826	up	--	--	--	--	--	[R]	General function prediction only	PPR repeat;; PPR repeat family;; PPR repeat;; Pentatricopeptide repeat domain;; DYW family of nucleic acid deaminases;; Tetratricopeptide repeat;; Tetratricopeptide repeat;; Anaphase-promoting complex, cyclosome, subunit 3;; Region in Clathrin and VPS	Pentatricopeptide repeat-containing protein At2g22070 GN=PCMP-H41 OS=Arabidopsis thaliana (Mouse-ear cress) PE=3 SV=1	R	General function prediction only	PREDICTED: pentatricopeptide repeat-containing protein At1g20230 [Nelumbo nucifera]
Gb_27208	2.2535	266	1.50772	238	0.94584	169	0.448788	109	0.402573	52	0.509746	57	0.0215055	1.79736	up	[I]	Lipid transport and metabolism	Biological Process: isoprenoid biosynthetic process (GO:0008299);; Biological Process: phospholipid biosynthetic process (GO:0008654);; Molecular Function: geranylgeranyl-diphosphate geranylgeranyltransferase activity (GO:0016767);; Biological Process: monocarboxylic acid metabolic process (GO:0032787);; Biological Process: pigment biosynthetic process (GO:0046148);;	K02291|0|vvi:100246195|K02291 15-cis-phytoene/all-trans-phytoene synthase [EC:2.5.1.32 2.5.1.99] | (RefSeq) PSY1; phytoene synthase 2, chloroplastic	Carotenoid biosynthesis (ko00906)	[I]	Lipid transport and metabolism	Squalene/phytoene synthase	Phytoene synthase, chloroplastic (Precursor) GN=PSY OS=Cucumis melo (Muskmelon) PE=2 SV=1	I	Lipid transport and metabolism	unknown [Picea sitchensis]
Gb_00519	3.82442	713	3.37964	859	3.04799	852	1.06348	409	0.988498	198	0.889023	160	2.28911e-10	1.79462	up	--	--	--	K14684|1.33615e-58|smo:SELMODRAFT_20804|K14684 solute carrier family 25 (mitochondrial phosphate transporter), member 23/24/25/41 | (RefSeq) hypothetical protein	--	[C]	Energy production and conversion	EF hand;; EF-hand domain pair;; EF-hand domain;; EF hand	Calmodulin-like protein 7 GN=CML7 OS=Arabidopsis thaliana (Mouse-ear cress) PE=2 SV=1	C	Energy production and conversion	unknown [Picea sitchensis]
Gb_07565	1.14098	191	0.798667	178	0.858277	217	0.276569	95	0.244703	45	0.266273	45	8.93815e-05	1.79091	up	[R]	General function prediction only	--	--	--	[R]	General function prediction only	Ankyrin repeats (many copies);; Ankyrin repeats (many copies);; Ankyrin repeats (3 copies);; Ankyrin repeat;; Ankyrin repeat	Ankyrin repeat-containing protein At3g12360 GN=At3g12360 OS=Arabidopsis thaliana (Mouse-ear cress) PE=2 SV=1	R	General function prediction only	Ankyrin repeat-containing protein, putative isoform 1 [Theobroma cacao]
Gb_41436	2.02085	289	1.80673	352	1.89584	393	0.519469	149	0.444681	88	0.505313	77	1.38609e-06	1.78912	up	--	--	Cellular Component: mitochondrion (GO:0005739);; Cellular Component: chloroplast inner membrane (GO:0009706);;	--	--	--	--	Domain of unknown function (DUF3411)	--	S	Function unknown	PREDICTED: uncharacterized protein LOC100264910 [Vitis vinifera]
Gb_08375	1.54445	219	1.62084	307	1.60748	344	0.608428	177	0.324848	51	0.3976	57	1.90927e-05	1.78788	up	--	--	Molecular Function: protein dimerization activity (GO:0046983);;	--	--	--	--	Helix-loop-helix DNA-binding domain	Transcription factor bHLH30 OS=Arabidopsis thaliana (Mouse-ear cress) PE=1 SV=1	K	Transcription	hypothetical protein AMTR_s00010p00144270 [Amborella trichopoda]
Gb_38079	1.49602	328	2.00207	586	1.35638	449	0.554456	249	0.475011	114	0.334778	74	4.16808e-07	1.78608	up	--	--	--	--	--	--	--	Ankyrin repeats (3 copies);; KAP family P-loop domain;; Ankyrin repeats (many copies);; Ankyrin repeat;; Ankyrin repeat;; Ankyrin repeats (many copies)	--	R	General function prediction only	hypothetical protein [Cryptomeria japonica]
Gb_27133	9.51648	961	10.2049	1377	13.1853	2013	3.00773	622	3.43489	379	2.83844	289	3.79007e-16	1.78515	up	--	--	--	--	--	--	--	Transcriptional repressor, ovate	Transcription repressor OFP8 GN=OFP8 OS=Arabidopsis thaliana (Mouse-ear cress) PE=2 SV=1	S	Function unknown	hypothetical protein 0_11531_01, partial [Pinus taeda]
Gb_06089	0.677493	87	0.753488	129	0.922156	179	0.213511	56	0.241106	34	0.205266	27	0.0002609	1.78424	up	--	--	--	--	--	[R]	General function prediction only	PPR repeat;; PPR repeat family;; PPR repeat;; Pentatricopeptide repeat domain;; Tetratricopeptide repeat;; Tetratricopeptide repeat;; Tetratricopeptide repeat;; Tetratricopeptide repeat	Pentatricopeptide repeat-containing protein At2g13600 GN=PCMP-E76 OS=Arabidopsis thaliana (Mouse-ear cress) PE=3 SV=1	R	General function prediction only	unknown [Picea sitchensis]
Gb_21049	2.8754	375	2.19416	382	2.37892	469	1.23692	330	0.58791	84	0.258685	34	0.000382115	1.78388	up	--	--	--	--	--	[R]	General function prediction only	PPR repeat family;; PPR repeat;; Pentatricopeptide repeat domain;; PPR repeat;; DYW family of nucleic acid deaminases;; Mitochondrial ATPase expression	Pentatricopeptide repeat-containing protein At1g11290 GN=T28P6.20 OS=Arabidopsis thaliana (Mouse-ear cress) PE=2 SV=1	R	General function prediction only	unknown [Picea sitchensis]
Gb_09634	1.53782	174	1.24724	189	3.53587	605	0.554568	129	0.795392	99	0.418893	48	0.0487117	1.78255	up	--	--	--	--	--	--	--	Protein of unknown function DUF260	LOB domain-containing protein 38 GN=F3A4.20 OS=Arabidopsis thaliana (Mouse-ear cress) PE=2 SV=1	S	Function unknown	hypothetical protein CARUB_v10005616mg [Capsella rubella]
Gb_01898	2.0909	279	3.53269	630	1.91929	387	0.468643	128	0.999452	146	0.686453	92	0.000886359	1.77826	up	--	--	--	--	--	[R]	General function prediction only	Leucine Rich repeats (2 copies);; Leucine rich repeat;; Leucine Rich Repeat;; Leucine Rich repeat;; Leucine rich repeat;; Leucine rich repeat N-terminal domain	Receptor-like protein 12 (Precursor) GN=RLP12 OS=Arabidopsis thaliana (Mouse-ear cress) PE=2 SV=2	R	General function prediction only	PREDICTED: leucine-rich repeat receptor-like protein CLAVATA2 [Vitis vinifera]
Gb_36903	3.34427	636	3.28856	841	3.90577	1033	0.962705	373	1.00515	221	0.857808	172	4.75213e-11	1.7746	up	--	--	Biological Process: response to osmotic stress (GO:0006970);; Biological Process: systemic acquired resistance (GO:0009627);; Biological Process: response to ethylene (GO:0009723);; Biological Process: response to abscisic acid (GO:0009737);; Biological Process: response to jasmonic acid (GO:0009753);; Biological Process: hormone-mediated signaling pathway (GO:0009755);; Cellular Component: integ…	K13447|0|smo:SELMODRAFT_97417|K13447 respiratory burst oxidase [EC:1.6.3.- 1.11.1.-] | (RefSeq) RHD2L1-1; hypothetical protein	--	[PQ]	Inorganic ion transport and metabolism;; Secondary metabolites biosynthesis, transport and catabolism	Ferric reductase NAD binding domain;; Respiratory burst NADPH oxidase;; FAD-binding domain;; Ferric reductase like transmembrane component;; EF-hand domain pair;; EF hand;; Oxidoreductase FAD-binding domain	Respiratory burst oxidase homolog protein F GN=F22C12.18 OS=Arabidopsis thaliana (Mouse-ear cress) PE=1 SV=1	PQ	Inorganic ion transport and metabolism;; Secondary metabolites biosynthesis, transport and catabolism	hypothetical protein SELMODRAFT_97417 [Selaginella moellendorffii]
Gb_35168	2.11632	294	1.90353	354	1.94141	408	0.852188	243	0.646677	99	0.173211	25	1.44114e-05	1.77435	up	--	--	Cellular Component: mitochondrion (GO:0005739);;	--	--	[R]	General function prediction only	PPR repeat;; PPR repeat family;; PPR repeat;; Pentatricopeptide repeat domain;; Tetratricopeptide repeat;; DYW family of nucleic acid deaminases;; Tetratricopeptide repeat;; Tetratricopeptide repeat;; Tetratricopeptide repeat;; Caspase recruitment domain;; Tetratricopeptide repeat;; Tetratricopeptide repeat;; Tetratricopeptide repeat	Pentatricopeptide repeat-containing protein At4g02750 GN=PCMP-H24 OS=Arabidopsis thaliana (Mouse-ear cress) PE=3 SV=1	R	General function prediction only	PREDICTED: pentatricopeptide repeat-containing protein At4g02750 [Vitis vinifera]
Gb_24737	1.52243	83	1.56749	114	1.03973	86	0.46616	52	0.403249	24	0.309523	17	0.00198294	1.77282	up	--	--	Cellular Component: Golgi apparatus (GO:0005794);; Molecular Function: electron carrier activity (GO:0009055);; Biological Process: toxin catabolic process (GO:0009407);; Biological Process: response to chitin (GO:0010200);; Biological Process: response to cyclopentenone (GO:0010583);; Biological Process: hydrogen peroxide catabolic process (GO:0042744);; Biological Process: para-aminobenzoic aci…	--	--	[C]	Energy production and conversion	Pyridine nucleotide-disulphide oxidoreductase;; Pyridine nucleotide-disulphide oxidoreductase	--	C	Energy production and conversion	hypothetical protein CICLE_v10028687mg [Citrus clementina]
Gb_17195	1.61213	473	1.69216	658	1.65466	721	0.466712	279	0.50214	161	0.442964	130	5.27656e-09	1.76903	up	[V]	Defense mechanisms	--	--	--	[Q]	Secondary metabolites biosynthesis, transport and catabolism	ABC-2 type transporter;; ABC transporter;; Plant PDR ABC transporter associated;; ABC-transporter extracellular N-terminal;; AAA domain;; AAA domain;; ATPase family associated with various cellular activities (AAA)	Pleiotropic drug resistance protein 2 GN=PDR2 OS=Nicotiana plumbaginifolia (Leadwort-leaved tobacco) PE=2 SV=1	Q	Secondary metabolites biosynthesis, transport and catabolism	PREDICTED: pleiotropic drug resistance protein 2-like isoform X1 [Nelumbo nucifera]
Gb_36290	8.62374	1075	6.84643	1141	6.77298	1276	2.22425	568	2.19671	300	1.96657	246	7.16063e-11	1.76722	up	--	--	--	--	--	--	--	CCT motif	--	S	Function unknown	unknown [Picea sitchensis]
Gb_25701	59.3539	2619	47.5358	2804	40.4678	2700	13.9702	1262	14.9695	722	13.5008	599	6.38322e-07	1.76705	up	--	--	--	--	--	--	--	--	--	--	--	--
Gb_00381	768.94	27024	767.627	35886	787.38	41685	267.625	19329	196.584	7602	189.059	6899	2.26169e-25	1.76698	up	--	--	Molecular Function: monooxygenase activity (GO:0004497);; Molecular Function: protein binding (GO:0005515);; Cellular Component: chloroplast (GO:0009507);; Biological Process: photorespiration (GO:0009853);; Molecular Function: ribulose-bisphosphate carboxylase activity (GO:0016984);; Biological Process: reductive pentose-phosphate cycle (GO:0019253);; Biological Process: oxidation-reduction proc…	K01602|9.36592e-75|sot:102601229|K01602 ribulose-bisphosphate carboxylase small chain [EC:4.1.1.39] | (RefSeq) RBCS-2B, rbcS2b; ribulose bisphosphate carboxylase small chain 2C, chloroplastic	Glyoxylate and dicarboxylate metabolism (ko00630);; Carbon fixation in photosynthetic organisms (ko00710);; Carbon metabolism (ko01200)	--	--	Ribulose bisphosphate carboxylase, small chain;; Ribulose-1,5-bisphosphate carboxylase small subunit	Ribulose bisphosphate carboxylase small chain, chloroplastic (Precursor) GN=RBCS OS=Larix laricina (Tamarack) PE=3 SV=1	G	Carbohydrate transport and metabolism	RecName: Full=Ribulose bisphosphate carboxylase small chain, chloroplastic; Short=RuBisCO small subunit; Flags: Precursor [Larix laricina]
Gb_41394	24.897	1371	21.8376	1607	20.7214	1725	6.78445	765	6.45788	389	6.12892	340	1.21455e-15	1.76509	up	--	--	--	--	--	[C]	Energy production and conversion	Mitochondrial glycoprotein	Uncharacterized protein At2g39795, mitochondrial (Precursor) GN=At2g39795 OS=Arabidopsis thaliana (Mouse-ear cress) PE=2 SV=1	C	Energy production and conversion	unknown [Picea sitchensis]
Gb_08300	1.89672	93	1.93974	128	1.36689	102	0.456247	46	0.514811	28	0.527614	26	0.000775906	1.76398	up	--	--	Biological Process: RNA interference (GO:0016246);; Biological Process: reproductive process (GO:0022414);; Biological Process: shoot system development (GO:0048367);; Biological Process: response to stimulus (GO:0050896);; Biological Process: multi-organism process (GO:0051704);;	K11699|1.68436e-90|cmo:103488305|K11699 RNA-dependent RNA polymerase [EC:2.7.7.48] | (RefSeq) RNA-dependent RNA polymerase 6	--	[A]	RNA processing and modification	RNA dependent RNA polymerase	RNA-dependent RNA polymerase 6 OS=Arabidopsis thaliana (Mouse-ear cress) PE=1 SV=1	A	RNA processing and modification	unknown [Glycine max]
Gb_19657	0.635741	57	0.876847	108	0.906847	127	0.288864	56	0.11398	12	0.250716	25	0.00145519	1.76368	up	[E]	Amino acid transport and metabolism	Molecular Function: 2-isopropylmalate synthase activity (GO:0003852);; Biological Process: leucine biosynthetic process (GO:0009098);;	K01649|1.07807e-138|sot:102601609|K01649 2-isopropylmalate synthase [EC:2.3.3.13] | (RefSeq) 2-isopropylmalate synthase B	Valine, leucine and isoleucine biosynthesis (ko00290);; Pyruvate metabolism (ko00620);; 2-Oxocarboxylic acid metabolism (ko01210);; Biosynthesis of amino acids (ko01230)	[E]	Amino acid transport and metabolism	LeuA allosteric (dimerisation) domain	2-isopropylmalate synthase B GN=IPMSB OS=Solanum pennellii (Tomato) PE=2 SV=1	E	Amino acid transport and metabolism	putative isopropylmalate synthase [Capsicum annuum]
Gb_36548	21.3638	1825	20.31	2319	23.3079	3011	6.03561	1056	6.94962	649	5.72986	493	6.06481e-20	1.75923	up	--	--	--	--	--	--	--	Protein of unknown function (DUF3049)	--	S	Function unknown	hypothetical protein JCGZ_12692 [Jatropha curcas]
Gb_35158	2.53209	111	3.20569	177	3.17471	184	0.958133	77	0.676791	34	0.684286	37	0.000235799	1.75242	up	--	--	--	--	--	--	--	--	--	S	Function unknown	unknown [Picea sitchensis]
Gb_28263	3.46853	156	2.93429	176	2.39217	163	0.90293	83	0.528725	26	1.12794	51	0.000254541	1.75213	up	[R]	General function prediction only	Molecular Function: O-methyltransferase activity (GO:0008171);; Biological Process: methylation (GO:0032259);;	K00545|3.18559e-74|ppp:PHYPADRAFT_229935|K00545 catechol O-methyltransferase [EC:2.1.1.6] | (RefSeq) hypothetical protein	Tyrosine metabolism (ko00350);; Betalain biosynthesis (ko00965)	[Q]	Secondary metabolites biosynthesis, transport and catabolism	O-methyltransferase;; Methyltransferase domain;; Methyltransferase domain	--	Q	Secondary metabolites biosynthesis, transport and catabolism	unknown [Picea sitchensis]
Gb_15010	8.81324	853	8.39701	1084	9.71272	1421	2.10552	415	2.6909	286	3.01981	294	6.09999e-14	1.75203	up	--	--	Molecular Function: hydrolase activity, hydrolyzing O-glycosyl compounds (GO:0004553);; Cellular Component: extracellular region (GO:0005576);; Cellular Component: plasma membrane (GO:0005886);; Biological Process: metabolic process (GO:0008152);;	K19891|1.36578e-28|crb:CARUB_v10012467mg|K19891 glucan endo-1,3-beta-glucosidase 1/2/3 [EC:3.2.1.39] | (RefSeq) hypothetical protein	Starch and sucrose metabolism (ko00500)	--	--	X8 domain	Glucan endo-1,3-beta-glucosidase 1 (Precursor) OS=Arabidopsis thaliana (Mouse-ear cress) PE=1 SV=3	R	General function prediction only	unknown [Picea sitchensis]
Gb_27897	1.12944	79	1.20438	111	1.12308	118	0.324571	46	0.412547	33	0.240856	17	0.000983709	1.75135	up	--	--	--	--	--	--	--	--	CLE25p (Precursor) GN=CLE25 OS=Arabidopsis thaliana (Mouse-ear cress) PE=2 SV=1	S	Function unknown	PREDICTED: CLAVATA3/ESR (CLE)-related protein 25-like [Nelumbo nucifera]
Gb_06595	19.1202	2424	17.1329	2898	15.5231	2976	4.30468	1115	5.81476	805	4.99133	637	2.13595e-17	1.74841	up	--	--	Molecular Function: DNA binding (GO:0003677);;	--	--	[R]	General function prediction only	--	--	R	General function prediction only	unknown [Picea sitchensis]
Gb_15886	4.73029	748	4.48565	948	4.22926	1010	1.39684	452	1.49442	258	1.01135	161	7.38163e-11	1.74824	up	--	--	Molecular Function: transferase activity (GO:0016740);; Biological Process: developmental process (GO:0032502);; Biological Process: single-organism process (GO:0044699);;	K15400|5.98853e-145|cic:CICLE_v10010432mg|K15400 omega-hydroxypalmitate O-feruloyl transferase [EC:2.3.1.188] | (RefSeq) hypothetical protein	Cutin, suberine and wax biosynthesis (ko00073)	--	--	Transferase family	Omega-hydroxypalmitate O-feruloyl transferase GN=MEE6.11 OS=Arabidopsis thaliana (Mouse-ear cress) PE=1 SV=1	S	Function unknown	PREDICTED: omega-hydroxypalmitate O-feruloyl transferase [Nelumbo nucifera]
Gb_01592	2.53334	295	2.14419	333	2.31266	407	0.914243	218	0.655783	84	0.44463	52	1.2118e-05	1.74758	up	--	--	--	--	--	[R]	General function prediction only	PPR repeat;; PPR repeat family;; PPR repeat;; Pentatricopeptide repeat domain;; DYW family of nucleic acid deaminases;; Tetratricopeptide repeat	Pentatricopeptide repeat-containing protein At4g14050, mitochondrial (Precursor) OS=Arabidopsis thaliana (Mouse-ear cress) PE=2 SV=3	R	General function prediction only	unknown [Picea sitchensis]
Gb_22761	25.0854	4946	27.2481	7183	28.5951	8527	7.80684	3151	8.34578	1798	7.40459	1468	1.88603e-24	1.74364	up	--	--	Molecular Function: transcription factor activity, sequence-specific DNA binding (GO:0003700);; Cellular Component: nucleus (GO:0005634);; Biological Process: regulation of transcription, DNA-templated (GO:0006355);; Molecular Function: sequence-specific DNA binding (GO:0043565);;	--	--	--	--	MEKHLA domain;; START domain;; Homeobox domain	Homeobox-leucine zipper protein ATHB-15 OS=Arabidopsis thaliana (Mouse-ear cress) PE=1 SV=1	K	Transcription	class III homeodomain-leucine zipper protein C3HDZ2 [Ginkgo biloba]
Gb_07315	12.5708	1180	12.4885	1568	12.5277	1779	4.77191	917	3.40287	349	2.72145	257	5.54047e-14	1.74329	up	[Q]	Secondary metabolites biosynthesis, transport and catabolism	Molecular Function: monooxygenase activity (GO:0004497);; Molecular Function: iron ion binding (GO:0005506);; Molecular Function: electron carrier activity (GO:0009055);; Molecular Function: oxidoreductase activity, acting on paired donors, with incorporation or reduction of molecular oxygen (GO:0016705);; Molecular Function: heme binding (GO:0020037);; Biological Process: oxidation-reduction pro…	--	--	[Q]	Secondary metabolites biosynthesis, transport and catabolism	Cytochrome P450	Cytochrome P450 78A4 GN=CYP78A4 OS=Pinus radiata (Monterey pine) PE=2 SV=1	Q	Secondary metabolites biosynthesis, transport and catabolism	unknown [Picea sitchensis]
NG_14605	2.93358	225	2.67252	274	1.93299	225	0.900809	138	0.756358	63	0.50374	44	7.85022e-05	1.74251	up	--	--	Molecular Function: transferase activity (GO:0016740);;	--	--	--	--	Protein of unknown function (DUF1264);; Protein of unknown function (DUF1264)	Oil body-associated protein 2B OS=Arabidopsis thaliana OX=3702 GN=OBAP2B PE=2 SV=1	S	Function unknown	PREDICTED: oil body-associated protein 2B-like [Elaeis guineensis]
NG_19374	1.61055	75	1.21092	80	1.03021	76	0.195415	20	0.13868	8	0.754696	38	0.00100397	1.74186	up	--	--	--	--	--	--	--	--	--	--	--	--
Gb_19896	0.894698	111	1.23194	205	1.30169	245	0.549018	140	0.007449	2	0.424824	53	0.000682027	1.73871	up	--	--	--	--	--	[R]	General function prediction only	PPR repeat;; PPR repeat family;; PPR repeat;; Pentatricopeptide repeat domain;; Tetratricopeptide repeat;; Tetratricopeptide repeat	Pentatricopeptide repeat-containing protein DOT4, chloroplastic {ECO:0000305} (Precursor) GN=At4g18750 OS=Arabidopsis thaliana (Mouse-ear cress) PE=2 SV=1	R	General function prediction only	unknown [Picea sitchensis]
Gb_37313	2.56251	195	2.28274	227	3.00467	338	0.545939	89	1.24451	102	0.475769	36	1.00407e-05	1.73696	up	--	--	Molecular Function: peroxidase activity (GO:0004601);; Cellular Component: vacuole (GO:0005773);; Biological Process: response to oxidative stress (GO:0006979);; Cellular Component: plant-type cell wall (GO:0009505);; Cellular Component: membrane (GO:0016020);; Molecular Function: heme binding (GO:0020037);; Molecular Function: metal ion binding (GO:0046872);; Biological Process: oxidation-reduct…	K00430|6.2355e-151|pop:POPTR_0002s06590g|K00430 peroxidase [EC:1.11.1.7] | (RefSeq) POPTRDRAFT_830144; peroxidase precursor family protein	Phenylpropanoid biosynthesis (ko00940)	--	--	Peroxidase	Peroxidase 12 (Precursor) OS=Arabidopsis thaliana (Mouse-ear cress) PE=1 SV=1	G	Carbohydrate transport and metabolism	peroxidase [Picea abies]
Gb_27827	0.591114	115	0.728165	190	0.392109	116	0.164279	66	0.157436	34	0.17524	35	0.000446162	1.73518	up	[RTKL]	General function prediction only;; Signal transduction mechanisms;; Transcription;; Replication, recombination and repair	Molecular Function: protein kinase activity (GO:0004672);; Biological Process: signal transduction (GO:0007165);; Biological Process: phosphorylation (GO:0016310);; Biological Process: cell wall macromolecule metabolic process (GO:0044036);; Biological Process: primary metabolic process (GO:0044238);;	--	--	--	--	Protein kinase domain;; Protein tyrosine kinase;; Leucine Rich repeats (2 copies);; Leucine rich repeat;; Leucine Rich Repeat	Probable leucine-rich repeat receptor-like protein kinase At5g49770 (Precursor) GN=At5g49770 OS=Arabidopsis thaliana (Mouse-ear cress) PE=2 SV=1	T	Signal transduction mechanisms	PREDICTED: probable leucine-rich repeat receptor-like protein kinase At5g49770 [Vitis vinifera]
Gb_29631	14.7556	1033	11.8275	1107	13.3421	1413	3.58336	514	4.02738	308	4.12631	291	1.71422e-13	1.73517	up	--	--	--	--	--	--	--	Domain of unknown function (DUF4228)	Uncharacterized protein At1g66480 GN=At1g66480 OS=Arabidopsis thaliana (Mouse-ear cress) PE=2 SV=1	S	Function unknown	unknown [Picea sitchensis]
Gb_33675	26.8608	5087	30.9954	7716	29.7802	8272	8.31422	3079	9.1796	1963	7.91688	1502	1.55789e-24	1.73288	up	[RTKL]	General function prediction only;; Signal transduction mechanisms;; Transcription;; Replication, recombination and repair	Molecular Function: protein serine/threonine kinase activity (GO:0004674);; Molecular Function: phosphoprotein phosphatase activity (GO:0004721);; Molecular Function: ATP binding (GO:0005524);; Biological Process: protein phosphorylation (GO:0006468);; Cellular Component: integral component of membrane (GO:0016021);;	--	--	--	--	Leucine Rich repeats (2 copies);; Protein kinase domain;; Protein tyrosine kinase;; Leucine rich repeat;; Leucine Rich Repeat;; Leucine Rich repeat;; Leucine rich repeat;; Leucine rich repeat N-terminal domain;; YABBY protein	LRR receptor-like serine/threonine-protein kinase ERL1 {ECO:0000303|PubMed:14985254} (Precursor) OS=Arabidopsis thaliana (Mouse-ear cress) PE=1 SV=1	T	Signal transduction mechanisms	PREDICTED: LRR receptor-like serine/threonine-protein kinase ERL1 [Elaeis guineensis]
Gb_06260	10.009	728	7.26123	718	7.31527	814	2.04311	311	2.60501	204	2.62661	196	1.23523e-07	1.73184	up	--	--	--	--	--	--	--	--	--	--	--	unknown [Picea sitchensis]
Gb_23018	2.46773	300	1.94337	316	2.51323	462	0.332409	83	0.132079	18	1.59488	195	0.000901831	1.73101	up	--	--	--	--	--	[R]	General function prediction only	PPR repeat family;; PPR repeat;; Pentatricopeptide repeat domain;; PPR repeat;; DYW family of nucleic acid deaminases;; Tetratricopeptide repeat	Pentatricopeptide repeat-containing protein At4g37170 OS=Arabidopsis thaliana (Mouse-ear cress) PE=3 SV=1	R	General function prediction only	PREDICTED: pentatricopeptide repeat-containing protein At4g37170-like [Pyrus x bretschneideri]
Gb_14883	2.20345	183	2.44418	272	1.94697	245	0.684787	117	0.722541	66	0.521338	44	5.3947e-05	1.72942	up	--	--	Molecular Function: transferase activity, transferring glycosyl groups (GO:0016757);;	--	--	[GC]	Carbohydrate transport and metabolism;; Energy production and conversion	UDP-glucoronosyl and UDP-glucosyl transferase	UDP-glycosyltransferase 74E1 GN=UGT74E1 OS=Arabidopsis thaliana (Mouse-ear cress) PE=3 SV=1	CG	Energy production and conversion;; Carbohydrate transport and metabolism	unknown [Picea sitchensis]
Gb_26886	1.76034	138	1.4429	152	1.53394	182	0.574902	93	0.387707	34	0.415831	33	0.000547907	1.728	up	--	--	Molecular Function: transferase activity, transferring acyl groups other than amino-acyl groups (GO:0016747);;	K19861|0|gmx:100797017|K19861 benzyl alcohol O-benzoyltransferase [EC:2.3.1.196 2.3.1.232] | (RefSeq) benzyl alcohol O-benzoyltransferase	--	--	--	Transferase family	Benzyl alcohol O-benzoyltransferase GN=HSR201 OS=Nicotiana tabacum (Common tobacco) PE=1 SV=1	R	General function prediction only	unknown [Picea sitchensis]
Gb_13828	11.2141	604	10.0826	726	12.1925	993	3.66389	404	3.29224	194	2.86552	156	1.13743e-09	1.72797	up	[O]	Posttranslational modification, protein turnover, chaperones	--	--	--	[O]	Posttranslational modification, protein turnover, chaperones	DnaJ domain	Chaperone protein dnaJ 11, chloroplastic (Precursor) GN=T19K4.170 OS=Arabidopsis thaliana (Mouse-ear cress) PE=1 SV=2	O	Posttranslational modification, protein turnover, chaperones	unknown [Picea sitchensis]
Gb_12746	5.92863	647	6.03193	860	5.87051	973	1.53075	347	2.25302	272	1.36639	155	1.07427e-10	1.72296	up	--	--	Molecular Function: nucleotide binding (GO:0000166);;	--	--	--	--	RNA recognition motif. (a.k.a. RRM, RBD, or RNP domain)	--	R	General function prediction only	unknown [Picea sitchensis]
Gb_25709	0.453676	54	0.578185	92	0.697346	126	0.119762	30	0.218369	29	0.167026	20	0.000770683	1.72	up	--	--	--	--	--	--	--	GRAS domain family	Nodulation-signaling pathway 2 protein GN=NSP2 OS=Medicago truncatula (Barrel medic) PE=1 SV=1	K	Transcription	GRAS family transcription factor [Theobroma cacao]
Gb_32921	2.87248	572	3.28809	875	2.73362	823	0.801364	327	0.808343	176	1.03453	207	4.52025e-10	1.7176	up	--	--	--	--	--	[R]	General function prediction only	PPR repeat family;; PPR repeat;; PPR repeat;; Pentatricopeptide repeat domain;; DYW family of nucleic acid deaminases;; Tetratricopeptide repeat;; Tetratricopeptide repeat;; Stannin transmembrane	Pentatricopeptide repeat-containing protein At3g57430, chloroplastic (Precursor) GN=PCMP-H81 OS=Arabidopsis thaliana (Mouse-ear cress) PE=2 SV=2	R	General function prediction only	PpPPR_77 [Physcomitrella patens]
Gb_34773	5.46945	216	5.01169	264	6.19825	369	1.54211	125	1.78081	77	1.5994	64	1.04878e-05	1.7175	up	--	--	--	--	--	--	--	--	--	--	--	--
Gb_14797	0.512879	54	0.732476	102	0.723723	114	0.279689	60	0.195976	23	0.094459	10	0.00347142	1.7164	up	[C]	Energy production and conversion	Molecular Function: oxidoreductase activity, acting on CH-OH group of donors (GO:0016614);;	--	--	[V]	Defense mechanisms	FAD binding domain;; D-arabinono-1,4-lactone oxidase	L-galactono-1,4-lactone dehydrogenase 2, mitochondrial (Precursor) GN=OsJ_35179 OS=Oryza sativa subsp. japonica (Rice) PE=2 SV=1	S	Function unknown	hypothetical protein SELMODRAFT_181802 [Selaginella moellendorffii]
Gb_07516	2.09601	110	1.67401	117	1.73262	137	0.60674	65	0.32027	19	0.700035	37	0.00106159	1.713	up	--	--	--	--	--	--	--	--	--	--	--	--
Gb_29515	14.8687	537	13.2481	639	9.47102	517	4.25496	315	3.28235	130	3.64722	133	2.58041e-05	1.71194	up	--	--	--	--	--	--	--	Cotton fibre expressed protein	--	S	Function unknown	unknown [Picea sitchensis]
Gb_05364	2.22596	448	2.24468	604	2.06407	628	0.67863	280	0.696458	154	0.566017	115	7.37798e-08	1.71041	up	[R]	General function prediction only	--	K17985|0|pda:103711861|K17985 activating molecule in BECN1-regulated autophagy protein 1 | (RefSeq) uncharacterized LOC103711861	--	[R]	General function prediction only	WD domain, G-beta repeat	Flagellar WD repeat-containing protein Pf20 GN=PF20 OS=Chlamydomonas reinhardtii (Chlamydomonas smithii) PE=2 SV=1	R	General function prediction only	PREDICTED: uncharacterized protein LOC104610171 [Nelumbo nucifera]
Gb_34729	13.7519	1103	10.4316	1118	7.99691	971	3.20733	527	2.89902	255	3.55885	288	0.00042952	1.7061	up	--	--	Molecular Function: hydrolase activity, hydrolyzing O-glycosyl compounds (GO:0004553);; Cellular Component: cell wall (GO:0005618);; Biological Process: cellular glucan metabolic process (GO:0006073);; Molecular Function: xyloglucan:xyloglucosyl transferase activity (GO:0016762);; Cellular Component: apoplast (GO:0048046);;	K08235|3.0281e-165|mus:103990820|K08235 xyloglucan:xyloglucosyl transferase [EC:2.4.1.207] | (RefSeq) probable xyloglucan endotransglucosylase/hydrolase	--	--	--	Glycosyl hydrolases family 16;; Xyloglucan endo-transglycosylase (XET) C-terminus	Probable xyloglucan endotransglucosylase/hydrolase (Precursor) GN=XTH OS=Triticum aestivum (Wheat) PE=2 SV=1	R	General function prediction only	xyloglucan endotransglucosylase/hydrolase 1 [Pinus radiata]
Gb_31871	2.27671	148	1.68639	146	1.61533	159	0.393547	53	0.672365	48	0.6098	40	0.000230894	1.70401	up	[RTKL]	General function prediction only;; Signal transduction mechanisms;; Transcription;; Replication, recombination and repair	Molecular Function: protein serine/threonine kinase activity (GO:0004674);; Molecular Function: ATP binding (GO:0005524);; Biological Process: protein phosphorylation (GO:0006468);;	--	--	--	--	Protein kinase domain;; Protein tyrosine kinase	Probable LRR receptor-like serine/threonine-protein kinase At4g36180 (Precursor) GN=At4g36180 OS=Arabidopsis thaliana (Mouse-ear cress) PE=2 SV=1	T	Signal transduction mechanisms	receptor-like kinase [Marchantia polymorpha]
Gb_06116	25.4231	711	28.0983	1069	32.1428	1374	9.51313	599	6.71897	226	7.41227	223	2.40747e-11	1.70198	up	--	--	--	--	--	--	--	Chlorophyll A-B binding protein	Early light-induced protein, chloroplastic (Precursor) OS=Pisum sativum (Garden pea) PE=2 SV=1	S	Function unknown	unknown [Picea sitchensis]
Gb_05522	36.128	6762	38.723	9577	39.7429	11224	11.9041	4360	12.2468	2350	12.0125	2136	3.45957e-24	1.70068	up	[V]	Defense mechanisms	--	K05665|0|tcc:TCM_042344|K05665 ATP-binding cassette, subfamily C (CFTR/MRP), member 1 | (RefSeq) Multidrug resistance protein ABC transporter family	--	[Q]	Secondary metabolites biosynthesis, transport and catabolism	ABC transporter transmembrane region;; ABC transporter;; P-loop containing region of AAA domain;; Miro-like protein;; AAA domain;; 50S ribosome-binding GTPase;; Type II/IV secretion system protein;; Domain of unknown function DUF87	ABC transporter C family member 9 GN=T2O9.140 OS=Arabidopsis thaliana (Mouse-ear cress) PE=2 SV=2	Q	Secondary metabolites biosynthesis, transport and catabolism	PREDICTED: putative ABC transporter C family member 15 isoform X2 [Nelumbo nucifera]
Gb_16072	3.18146	460	2.26714	438	1.89679	415	0.615849	183	0.899406	142	0.707344	103	0.000408901	1.70036	up	--	--	--	--	--	[R]	General function prediction only	PPR repeat family;; PPR repeat;; PPR repeat;; Pentatricopeptide repeat domain;; DYW family of nucleic acid deaminases;; Tetratricopeptide repeat;; Tetratricopeptide repeat;; Mitochondrial ATPase expression;; Tetratricopeptide repeat;; Tetratricopeptide repeat;; Vacuolar sorting protein 39 domain 1;; Tetratricopeptide repeat;; Tetratricopeptide repeat	Pentatricopeptide repeat-containing protein DOT4, chloroplastic {ECO:0000305} (Precursor) GN=At4g18750 OS=Arabidopsis thaliana (Mouse-ear cress) PE=2 SV=1	R	General function prediction only	unknown [Picea sitchensis]
Gb_04810	1.81765	70	2.58582	124	1.93908	108	0.593843	47	0.694997	30	0.506327	20	0.00137302	1.69933	up	--	--	--	--	--	--	--	--	--	--	--	--
Gb_30138	1.50069	75	0.943817	64	1.3091	94	0.135959	10	0.679525	38	0.40132	17	0.000796077	1.69717	up	--	--	--	--	--	--	--	--	MEPFL1 {ECO:0000305} (Precursor) GN=F18D22.80 OS=Arabidopsis thaliana (Mouse-ear cress) PE=1 SV=1	S	Function unknown	unknown [Picea sitchensis]
Gb_34329	3.07125	201	3.27888	286	2.82686	279	0.875636	117	0.912575	66	0.974232	64	2.93313e-05	1.69357	up	[Z]	Cytoskeleton	Molecular Function: ATP binding (GO:0005524);; Cellular Component: cytoplasm (GO:0005737);; Cellular Component: cytoskeleton (GO:0005856);;	K10355|0|ppp:PHYPADRAFT_198730|K10355 actin, other eukaryote | (RefSeq) hypothetical protein	--	[Z]	Cytoskeleton	Actin	Actin OS=Coleochaete scutata PE=2 SV=1	Z	Cytoskeleton	RecName: Full=Actin [Coleochaete scutata]
Gb_39989	1.9972	137	1.49438	137	1.23568	128	0.597667	84	0.481596	36	0.34476	24	0.00159415	1.69355	up	[L]	Replication, recombination and repair	--	--	--	[L]	Replication, recombination and repair	HhH-GPD superfamily base excision DNA repair protein	A/G-specific adenine DNA glycosylase GN=MYH OS=Arabidopsis thaliana (Mouse-ear cress) PE=3 SV=1	L	Replication, recombination and repair	hypothetical protein AMTR_s00066p00103210 [Amborella trichopoda]
Gb_21351	0.715693	118	0.878227	194	0.804704	201	0.464753	157	0	0	0.246807	41	0.00338163	1.69347	up	--	--	--	--	--	[R]	General function prediction only	PPR repeat family;; PPR repeat;; PPR repeat;; Pentatricopeptide repeat domain;; DYW family of nucleic acid deaminases;; Tetratricopeptide repeat	Pentatricopeptide repeat-containing protein At5g55740, chloroplastic (Precursor) GN=MDF20.18 OS=Arabidopsis thaliana (Mouse-ear cress) PE=2 SV=1	R	General function prediction only	predicted protein [Physcomitrella patens]
NG_4595	2.58505	161	1.09229	114	1.18134	139	0.41513	52	0.518981	45	0.62054	37	0.00988477	1.69289	up	--	--	--	--	--	--	--	--	--	--	--	--
Gb_40436	0.938553	143	1.52344	309	1.22688	282	0.340813	106	0.272707	46	0.495745	76	2.3431e-05	1.68968	up	--	--	--	--	--	[R]	General function prediction only	PPR repeat family;; PPR repeat;; PPR repeat;; Pentatricopeptide repeat domain;; DYW family of nucleic acid deaminases;; Domain of unknown function (DUF4182);; Vacuolar sorting protein 39 domain 1	Pentatricopeptide repeat-containing protein At4g13650 GN=PCMP-H42 OS=Arabidopsis thaliana (Mouse-ear cress) PE=2 SV=2	R	General function prediction only	PREDICTED: pentatricopeptide repeat-containing protein At4g13650 [Elaeis guineensis]
Gb_25455	24.8347	2801	20.8606	3105	20.6991	3511	7.55851	1731	6.60279	801	6.07756	681	1.72263e-13	1.68785	up	[RTKL]	General function prediction only;; Signal transduction mechanisms;; Transcription;; Replication, recombination and repair	Molecular Function: nucleotide binding (GO:0000166);; Molecular Function: protein kinase activity (GO:0004672);; Cellular Component: membrane (GO:0016020);; Biological Process: phosphorylation (GO:0016310);; Biological Process: primary metabolic process (GO:0044238);; Biological Process: cellular macromolecule metabolic process (GO:0044260);; Biological Process: regulation of cellular process (GO…	--	--	--	--	Protein kinase domain;; Protein tyrosine kinase;; Leucine rich repeat;; Leucine Rich repeats (2 copies);; Leucine rich repeat N-terminal domain;; Leucine Rich Repeat	Probable inactive receptor kinase At4g23740 (Precursor) GN=At4g23740 OS=Arabidopsis thaliana (Mouse-ear cress) PE=2 SV=1	T	Signal transduction mechanisms	PREDICTED: probable leucine-rich repeat receptor-like protein kinase At1g68400 [Vitis vinifera]
Gb_02957	1004.94	108405	966.71	139555	1036.93	169236	290.616	63910	320.619	37677	307.687	33331	9.76519e-20	1.68213	up	--	--	--	--	--	--	--	Ricin-type beta-trefoil lectin domain-like;; Ricin-type beta-trefoil lectin domain	--	S	Function unknown	unknown [Picea sitchensis]
Gb_06115	0.975193	128	0.847121	149	0.731736	145	0.36424	98	0.167347	24	0.238065	32	0.00170096	1.68139	up	--	--	--	--	--	[R]	General function prediction only	PPR repeat family;; PPR repeat;; Pentatricopeptide repeat domain;; PPR repeat;; DYW family of nucleic acid deaminases	Pentatricopeptide repeat-containing protein At4g33170 GN=PCMP-H53 OS=Arabidopsis thaliana (Mouse-ear cress) PE=3 SV=1	R	General function prediction only	unknown [Picea sitchensis]
Gb_10472	31.3021	1492	27.9705	1776	22.5023	1624	8.44251	829	8.08067	426	8.30257	397	9.03421e-09	1.68041	up	[C]	Energy production and conversion	Molecular Function: binding (GO:0005488);;	--	--	--	--	--	--	C	Energy production and conversion	unknown [Picea sitchensis]
Gb_36731	1.50342	144	1.55463	212	1.50715	243	0.427582	99	0.496024	49	0.527332	48	0.000136628	1.67953	up	[C]	Energy production and conversion	Molecular Function: DNA binding (GO:0003677);; Cellular Component: nucleus (GO:0005634);; Molecular Function: oxidoreductase activity (GO:0016491);; Biological Process: oxidation-reduction process (GO:0055114);;	--	--	[C]	Energy production and conversion	Aldo/keto reductase family	Probable aldo-keto reductase 1 GN=AKR1 OS=Glycine max (Soybean) PE=2 SV=1	C	Energy production and conversion	hypothetical protein SELMODRAFT_270369 [Selaginella moellendorffii]
Gb_09173	3.58585	168	5.2378	328	4.54989	322	1.59971	154	1.48196	76	0.952552	45	4.14496e-05	1.67911	up	--	--	--	--	--	--	--	--	--	--	--	unknown [Picea sitchensis]
Gb_14172	1.03276	162	1.1349	238	1.14241	271	0.361686	116	0.370684	64	0.269819	43	9.673e-05	1.67726	up	--	--	--	--	--	[R]	General function prediction only	PPR repeat family;; PPR repeat;; PPR repeat;; Pentatricopeptide repeat domain;; DYW family of nucleic acid deaminases;; Stannin transmembrane	Pentatricopeptide repeat-containing protein At1g11290 GN=T28P6.20 OS=Arabidopsis thaliana (Mouse-ear cress) PE=2 SV=1	R	General function prediction only	PREDICTED: pentatricopeptide repeat-containing protein At2g39620 [Nelumbo nucifera]
Gb_11567	46.2901	3068	38.9877	3454	38.5267	3861	10.1887	1382	14.2109	1029	13.6606	911	5.30647e-16	1.67511	up	[R]	General function prediction only	Molecular Function: nucleotide binding (GO:0000166);; Molecular Function: RNA binding (GO:0003723);;	--	--	[R]	General function prediction only	RNA recognition motif. (a.k.a. RRM, RBD, or RNP domain);; RNA recognition motif (a.k.a. RRM, RBD, or RNP domain);; RNA recognition motif. (a.k.a. RRM, RBD, or RNP domain);; Nup53/35/40-type RNA recognition motif	Glycine-rich RNA-binding protein 2, mitochondrial (Precursor) GN=At4g13850 OS=Arabidopsis thaliana (Mouse-ear cress) PE=1 SV=1	R	General function prediction only	unknown [Picea sitchensis]
Gb_04116	29.3945	1618	28.7022	2112	28.2119	2349	10.3522	1167	9.23186	556	6.70144	371	9.85339e-16	1.67478	up	--	--	--	--	--	--	--	Plant protein of unknown function (DUF822)	BES1/BZR1 homolog protein 4 GN=BEH4 OS=Arabidopsis thaliana (Mouse-ear cress) PE=1 SV=1	S	Function unknown	unknown [Picea sitchensis]
Gb_20266	1.36667	250	1.15365	281	1.24828	344	0.609216	228	0	0	0.534451	98	0.00103853	1.67418	up	--	--	--	--	--	[R]	General function prediction only	PPR repeat family;; PPR repeat;; PPR repeat;; Pentatricopeptide repeat domain;; DYW family of nucleic acid deaminases;; Tetratricopeptide repeat;; Domain of unknown function (DUF3291)	Pentatricopeptide repeat-containing protein At4g13650 GN=PCMP-H42 OS=Arabidopsis thaliana (Mouse-ear cress) PE=2 SV=2	R	General function prediction only	pentatricopeptide repeat protein 77 [Funaria hygrometrica]
Gb_10768	1.29641	190	1.10817	217	1.26528	280	0.38505	116	0.360496	58	0.37344	55	8.62785e-05	1.67411	up	--	--	--	K17710|2.19307e-143|ppp:PHYPADRAFT_140042|K17710 pentatricopeptide repeat domain-containing protein 1 | (RefSeq) hypothetical protein	--	[R]	General function prediction only	PPR repeat family;; PPR repeat;; PPR repeat;; Pentatricopeptide repeat domain;; Tetratricopeptide repeat;; Tetratricopeptide repeat	Pentatricopeptide repeat-containing protein At1g19720 OS=Arabidopsis thaliana (Mouse-ear cress) PE=2 SV=1	S	Function unknown	PREDICTED: pentatricopeptide repeat-containing protein At5g55740, chloroplastic-like isoform X1 [Nelumbo nucifera]
Gb_04385	1.37136	222	0.957791	207	1.17592	288	0.331104	110	0.39795	71	0.341789	56	5.85362e-05	1.67234	up	--	--	--	--	--	[R]	General function prediction only	PPR repeat family;; PPR repeat;; PPR repeat;; Pentatricopeptide repeat domain;; Tetratricopeptide repeat;; Tetratricopeptide repeat;; Vacuolar sorting protein 39 domain 1;; Tetratricopeptide repeat;; Tetratricopeptide repeat	Pentatricopeptide repeat-containing protein At3g09040, mitochondrial (Precursor) GN=PCMP-E88 OS=Arabidopsis thaliana (Mouse-ear cress) PE=2 SV=1	R	General function prediction only	pentatricopeptide repeat protein [Physcomitrella patens]
Gb_41412	1.51343	452	1.83472	726	1.8055	819	0.670488	383	0.718642	154	0.557569	141	3.15278e-08	1.67129	up	--	--	Molecular Function: G-protein coupled receptor activity (GO:0004930);; Molecular Function: extracellular ligand-gated ion channel activity (GO:0005230);; Biological Process: calcium ion transport (GO:0006816);; Biological Process: cell surface receptor signaling pathway (GO:0007166);; Molecular Function: glutamate receptor activity (GO:0008066);; Biological Process: response to abiotic stimulus (…	K05387|0|pda:103717150|K05387 glutamate receptor, ionotropic, plant | (RefSeq) glutamate receptor 3.5-like	--	[PET]	Inorganic ion transport and metabolism;; Amino acid transport and metabolism;; Signal transduction mechanisms	Receptor family ligand binding region;; Ligand-gated ion channel;; Periplasmic binding protein;; Bacterial extracellular solute-binding proteins, family 3	Glutamate receptor 3.3 (Precursor) GN=GLR3.3 OS=Arabidopsis thaliana (Mouse-ear cress) PE=2 SV=1	P	Inorganic ion transport and metabolism	PREDICTED: glutamate receptor 3.4-like [Elaeis guineensis]
Gb_06793	3.20453	327	4.29835	585	4.85396	748	1.90523	398	0.957996	107	0.867944	89	6.91852e-06	1.66984	up	[C]	Energy production and conversion	Molecular Function: D-arabinono-1,4-lactone oxidase activity (GO:0003885);; Molecular Function: UDP-N-acetylmuramate dehydrogenase activity (GO:0008762);; Cellular Component: membrane (GO:0016020);; Molecular Function: flavin adenine dinucleotide binding (GO:0050660);; Biological Process: oxidation-reduction process (GO:0055114);;	--	--	[V]	Defense mechanisms	FAD binding domain;; D-arabinono-1,4-lactone oxidase	L-galactono-1,4-lactone dehydrogenase 1, mitochondrial (Precursor) GN=OsJ_32931 OS=Oryza sativa subsp. japonica (Rice) PE=2 SV=1	V	Defense mechanisms	PREDICTED: LOW QUALITY PROTEIN: L-gulonolactone oxidase-like [Phoenix dactylifera]
Gb_13123	2.48708	173	3.15539	293	2.70029	286	0.989769	124	0.789677	60	1.00801	63	4.4688e-05	1.66912	up	--	--	--	--	--	--	--	Helix-loop-helix DNA-binding domain	Transcription factor bHLH19 GN=T30L20.2 OS=Arabidopsis thaliana (Mouse-ear cress) PE=2 SV=1	--	--	predicted protein [Physcomitrella patens]
NG_15967	2.9893	115	2.47995	128	1.77957	104	0.874585	69	0.949724	40	0.393552	16	0.00255188	1.66324	up	--	--	--	--	--	--	--	--	--	--	--	--
Gb_38661	30.8916	3471	35.5221	5342	32.6994	5562	11.3685	2616	9.24708	1131	9.94461	1119	2.67333e-20	1.66276	up	[Z]	Cytoskeleton	Molecular Function: structural constituent of cytoskeleton (GO:0005200);; Molecular Function: protein binding (GO:0005515);; Molecular Function: ATP binding (GO:0005524);; Cellular Component: cell wall (GO:0005618);; Cellular Component: nucleolus (GO:0005730);; Cellular Component: mitochondrion (GO:0005739);; Cellular Component: cytosol (GO:0005829);; Cellular Component: cytoskeleton (GO:0005856)…	K10355|0|ppp:PHYPADRAFT_226658|K10355 actin, other eukaryote | (RefSeq) hypothetical protein	--	[Z]	Cytoskeleton	Actin	Actin-7 GN=ACT7 OS=Arabidopsis thaliana (Mouse-ear cress) PE=1 SV=1	Z	Cytoskeleton	predicted protein [Physcomitrella patens]
Gb_11196	647.919	17329	692.934	24774	640.786	25918	220.798	12089	198.32	5795	192.361	5173	9.60036e-24	1.6592	up	--	--	--	--	--	--	--	Pathogenesis-related protein Bet v I family;; Polyketide cyclase / dehydrase and lipid transport	Pathogenesis-related protein 1 GN=PR1 OS=Asparagus officinalis (Garden asparagus) PE=2 SV=1	S	Function unknown	putative intracellular pathogenesis-related protein [Picea glauca]
Gb_36433	0.932118	112	0.789776	127	0.878654	159	0.327085	81	0.288017	38	0.177532	22	0.00152732	1.6575	up	--	--	Cellular Component: mitochondrion (GO:0005739);; Biological Process: sugar mediated signaling pathway (GO:0010182);; Biological Process: mitochondrial mRNA modification (GO:0080156);;	--	--	[R]	General function prediction only	PPR repeat family;; PPR repeat;; PPR repeat;; Pentatricopeptide repeat domain	Pentatricopeptide repeat-containing protein At2g13600 GN=PCMP-E76 OS=Arabidopsis thaliana (Mouse-ear cress) PE=3 SV=1	R	General function prediction only	unnamed protein product [Vitis vinifera]
Gb_05490	1.39001	125	1.23436	148	1.35767	184	0.49246	91	0.334933	33	0.393253	36	0.000873967	1.65505	up	[GEPR]	Carbohydrate transport and metabolism;; Amino acid transport and metabolism;; Inorganic ion transport and metabolism;; General function prediction only	Molecular Function: inorganic phosphate transmembrane transporter activity (GO:0005315);; Biological Process: phosphate ion transport (GO:0006817);; Cellular Component: integral component of membrane (GO:0016021);; Biological Process: transmembrane transport (GO:0055085);;	K08176|0|mus:103982632|K08176 MFS transporter, PHS family, inorganic phosphate transporter | (RefSeq) probable inorganic phosphate transporter 1-8	--	[P]	Inorganic ion transport and metabolism	Sugar (and other) transporter;; Major Facilitator Superfamily	Inorganic phosphate transporter 1-1 GN=MWF20.4 OS=Arabidopsis thaliana (Mouse-ear cress) PE=1 SV=2	P	Inorganic ion transport and metabolism	putative phosphate transporter [Cryptomeria japonica]
Gb_04468	0.525502	75	0.977911	141	0.711148	151	0.247923	71	0.159733	26	0.2072	28	0.00137698	1.65442	up	--	--	Molecular Function: Rho guanyl-nucleotide exchange factor activity (GO:0005089);;	--	--	--	--	PRONE (Plant-specific Rop nucleotide exchanger)	Rop guanine nucleotide exchange factor 9 GN=ROPGEF9 OS=Arabidopsis thaliana (Mouse-ear cress) PE=1 SV=1	T	Signal transduction mechanisms	predicted protein [Physcomitrella patens]
Gb_40303	1.00951	103	1.7024	232	1.12655	174	0.214033	45	0.703695	79	0.270819	28	0.00076025	1.65217	up	--	--	--	--	--	[R]	General function prediction only	PPR repeat family;; PPR repeat;; Pentatricopeptide repeat domain;; PPR repeat	Pentatricopeptide repeat-containing protein At3g24000, mitochondrial (Precursor) GN=PCMP-H87 OS=Arabidopsis thaliana (Mouse-ear cress) PE=3 SV=1	R	General function prediction only	unknown [Picea sitchensis]
Gb_38301	2.9652	465	3.03763	637	2.44917	581	0.659899	212	0.924582	159	1.05725	167	3.56006e-08	1.64958	up	--	--	--	--	--	[R]	General function prediction only	PPR repeat family;; PPR repeat;; PPR repeat;; Pentatricopeptide repeat domain;; DYW family of nucleic acid deaminases	Pentatricopeptide repeat-containing protein At1g11290 GN=T28P6.20 OS=Arabidopsis thaliana (Mouse-ear cress) PE=2 SV=1	R	General function prediction only	unknown [Picea sitchensis]
Gb_21415	7.87509	1254	8.06673	1717	7.66115	1844	2.21442	711	2.47564	431	2.70033	433	3.37636e-15	1.64909	up	--	--	--	--	--	--	--	bHLH-MYC and R2R3-MYB transcription factors N-terminal;; Helix-loop-helix DNA-binding domain	Truncated basic helix-loop-helix protein A GN=BHLH OS=Pisum sativum (Garden pea) PE=4 SV=1	K	Transcription	unknown [Picea sitchensis]
Gb_10423	0.950752	71	1.78981	178	0.976873	110	0.462016	71	0.247354	21	0.422615	32	0.00797756	1.64881	up	--	--	--	--	--	[R]	General function prediction only	C2H2-type zinc finger	Zinc finger protein ZAT5 GN=ZAT5 OS=Arabidopsis thaliana (Mouse-ear cress) PE=2 SV=1	K	Transcription	PREDICTED: zinc finger protein ZAT4 [Elaeis guineensis]
Gb_20311	6.37214	451	4.83944	458	4.35372	466	1.77451	257	1.68953	131	1.39071	99	1.52716e-05	1.64855	up	--	--	Molecular Function: actin binding (GO:0003779);; Cellular Component: nucleus (GO:0005634);; Cellular Component: mitochondrion (GO:0005739);; Cellular Component: plasma membrane (GO:0005886);; Biological Process: response to oxidative stress (GO:0006979);; Cellular Component: chloroplast (GO:0009507);; Biological Process: defense response signaling pathway, resistance gene-dependent (GO:0009870);;…	K05765|6.33474e-70|csv:101216727|K05765 cofilin | (RefSeq) actin-depolymerizing factor 1-like	--	[Z]	Cytoskeleton	Cofilin/tropomyosin-type actin-binding protein	Actin-depolymerizing factor 6 GN=OSJNBb0012E24.5 OS=Oryza sativa subsp. japonica (Rice) PE=2 SV=2	Z	Cytoskeleton	unknown [Picea sitchensis]
Gb_24353	3.71698	328	7.2939	859	4.1183	543	1.59962	282	1.60539	155	1.51901	134	0.00485113	1.64815	up	--	--	Biological Process: metal ion transport (GO:0030001);; Molecular Function: metal ion binding (GO:0046872);;	--	--	[P]	Inorganic ion transport and metabolism	Heavy-metal-associated domain	Copper transport protein ATX1 GN=ATX1 OS=Arabidopsis thaliana (Mouse-ear cress) PE=1 SV=1	P	Inorganic ion transport and metabolism	hypothetical protein AMTR_s00013p00034640 [Amborella trichopoda]
Gb_10393	13.0509	1149	9.22236	1085	10.7765	1435	3.88497	700	3.10823	299	3.30672	293	3.18504e-07	1.64789	up	--	--	Molecular Function: transferase activity, transferring glycosyl groups (GO:0016757);;	--	--	[GC]	Carbohydrate transport and metabolism;; Energy production and conversion	UDP-glucoronosyl and UDP-glucosyl transferase	UDP-glycosyltransferase 86A1 GN=UGT86A1 OS=Arabidopsis thaliana (Mouse-ear cress) PE=2 SV=1	CG	Energy production and conversion;; Carbohydrate transport and metabolism	unknown [Picea sitchensis]
Gb_16341	13.0514	1002	12.2584	1268	7.78024	898	3.68702	572	3.6931	311	3.07834	233	0.00030943	1.64687	up	[R]	General function prediction only	Molecular Function: oxidoreductase activity (GO:0016491);; Biological Process: oxidation-reduction process (GO:0055114);;	K04708|3.83146e-56|ppp:PHYPADRAFT_159151|K04708 3-dehydrosphinganine reductase [EC:1.1.1.102] | (RefSeq) hypothetical protein	Sphingolipid metabolism (ko00600)	[Q]	Secondary metabolites biosynthesis, transport and catabolism	short chain dehydrogenase;; Enoyl-(Acyl carrier protein) reductase;; KR domain;; Fungal family of unknown function (DUF1776)	3-dehydrosphinganine reductase TSC10B GN=TSC10B OS=Arabidopsis thaliana (Mouse-ear cress) PE=1 SV=1	R	General function prediction only	unknown [Picea sitchensis]
Gb_35186	2.83456	301	2.59806	374	1.93317	309	0.329295	108	1.05955	132	0.458625	74	8.08513e-06	1.64612	up	--	--	Molecular Function: transferase activity (GO:0016740);;	K18134|5.87204e-171|pop:POPTR_0016s05740g|K18134 protein O-GlcNAc transferase [EC:2.4.1.255] | (RefSeq) POPTRDRAFT_576368; hypothetical protein	Other types of O-glycan biosynthesis (ko00514)	[S]	Function unknown	Protein of unknown function (DUF563)	--	S	Function unknown	hypothetical protein POPTR_0016s05740g [Populus trichocarpa]
Gb_29798	584.948	29068	540.606	35912	529.532	39795	175.096	17813	177.575	9641	164.961	8243	3.121e-23	1.6433	up	[R]	General function prediction only	Molecular Function: poly(U) RNA binding (GO:0008266);; Biological Process: response to cold (GO:0009409);; Cellular Component: chloroplast thylakoid membrane (GO:0009535);; Cellular Component: chloroplast stroma (GO:0009570);; Biological Process: salicylic acid biosynthetic process (GO:0009697);; Biological Process: response to abscisic acid (GO:0009737);; Biological Process: defense response, in…	--	--	[R]	General function prediction only	RNA recognition motif. (a.k.a. RRM, RBD, or RNP domain);; RNA recognition motif (a.k.a. RRM, RBD, or RNP domain);; RNA recognition motif. (a.k.a. RRM, RBD, or RNP domain)	RNA-binding protein CP29B, chloroplastic {ECO:0000305} (Precursor) GN=F3G5.1 OS=Arabidopsis thaliana (Mouse-ear cress) PE=1 SV=1	A	RNA processing and modification	unknown [Picea sitchensis]
NG_6261	0.586963	51	0.748004	87	0.632315	84	0.176409	32	0.227171	22	0.202049	18	0.00325862	1.64328	up	--	--	--	--	--	--	--	GDSL/SGNH-like Acyl-Esterase family found in Pmr5 and Cas1p;; PMR5 N terminal Domain	Protein trichome birefringence-like 1 OS=Arabidopsis thaliana OX=3702 GN=TBL1 PE=2 SV=1	S	Function unknown	unknown [Picea sitchensis]
Gb_24346	1.07977	98	1.67384	202	1.67541	229	0.764657	142	0.529253	53	0.044876	5	0.00366943	1.64254	up	--	--	Biological Process: cellular process (GO:0009987);; Molecular Function: sequence-specific DNA binding (GO:0043565);; Biological Process: single-organism process (GO:0044699);; Biological Process: anatomical structure development (GO:0048856);; Biological Process: regulation of biological process (GO:0050789);;	--	--	--	--	TCP family transcription factor	Transcription factor TCP15 GN=TCP15 OS=Arabidopsis thaliana (Mouse-ear cress) PE=2 SV=1	K	Transcription	Transcription factor PCF2 [Medicago truncatula]
Gb_28336	1.47748	351	1.92522	585	1.73839	624	0.523072	254	0.831224	164	0.419783	101	2.61028e-07	1.6425	up	--	--	--	--	--	[P]	Inorganic ion transport and metabolism	HCO3- transporter family	Probable boron transporter 2 GN=BOR2 OS=Arabidopsis thaliana (Mouse-ear cress) PE=2 SV=1	U	Intracellular trafficking, secretion, and vesicular transport	HCO3 transporter [Emiliania huxleyi CCMP1516]
Gb_21109	2.86033	224	3.24952	218	3.92391	292	0.699926	68	1.3932	116	0.919013	44	2.16215e-05	1.642	up	--	--	--	--	--	--	--	Protein of unknown function DUF260	LOB domain-containing protein 4 GN=T19E23.11 OS=Arabidopsis thaliana (Mouse-ear cress) PE=2 SV=1	R	General function prediction only	PREDICTED: LOB domain-containing protein 4 [Nelumbo nucifera]
Gb_12164	9.33084	313	10.8715	487	11.3958	577	2.92485	201	3.98434	146	2.9636	100	4.79044e-07	1.6407	up	--	--	--	K14488|3.23589e-30|gmx:100798840|K14488 SAUR family protein | (RefSeq) auxin-induced protein 15A-like	Plant hormone signal transduction (ko04075)	--	--	Auxin responsive protein	Indole-3-acetic acid-induced protein ARG7 GN=ARG7 OS=Vigna radiata var. radiata (Mung bean) PE=2 SV=1	S	Function unknown	unknown [Picea sitchensis]
Gb_26155	1.20653	140	0.780005	121	1.21044	211	0.439178	104	0.406549	52	0.143793	17	0.00127206	1.63908	up	--	--	--	--	--	[R]	General function prediction only	PPR repeat family;; PPR repeat;; PPR repeat;; Pentatricopeptide repeat domain;; DYW family of nucleic acid deaminases	Pentatricopeptide repeat-containing protein At3g46790, chloroplastic (Precursor) GN=T6H20.180 OS=Arabidopsis thaliana (Mouse-ear cress) PE=2 SV=1	R	General function prediction only	unknown [Picea sitchensis]
Gb_36395	8.3897	982	8.664	1317	8.03779	1380	2.36878	540	3.26905	403	2.47007	274	8.75352e-13	1.63854	up	[R]	General function prediction only	Biological Process: sulfate assimilation (GO:0000103);; Cellular Component: cytosol (GO:0005829);; Biological Process: cysteine biosynthetic process from serine (GO:0006535);; Molecular Function: serine O-acetyltransferase activity (GO:0009001);;	--	--	[E]	Amino acid transport and metabolism	--	Serine acetyltransferase 4 GN=SAT4 OS=Arabidopsis thaliana (Mouse-ear cress) PE=1 SV=1	E	Amino acid transport and metabolism	unknown [Picea sitchensis]
Gb_13059	28.8493	1900	19.6915	1734	17.8739	1781	6.28539	848	7.61142	548	7.07368	469	0.000464222	1.63841	up	--	--	--	--	--	--	--	--	--	S	Function unknown	unknown [Picea sitchensis]
Gb_08841	4.01642	251	5.11758	427	3.78075	357	1.77646	227	1.03302	71	1.19805	76	3.05681e-05	1.63798	up	--	--	Molecular Function: cysteine-type endopeptidase activity (GO:0004197);; Cellular Component: chloroplast (GO:0009507);; Biological Process: positive regulation of programmed cell death (GO:0043068);;	--	--	[DO]	Cell cycle control, cell division, chromosome partitioning;; Posttranslational modification, protein turnover, chaperones	Caspase domain	Metacaspase-6 GN=YUP8H12R.6 OS=Arabidopsis thaliana (Mouse-ear cress) PE=1 SV=1	O	Posttranslational modification, protein turnover, chaperones	PREDICTED: metacaspase-6-like [Camelina sativa]
Gb_34305	8.33259	397	8.39468	534	8.34639	601	2.19196	214	2.69473	141	2.98597	143	1.62176e-07	1.63748	up	--	--	Biological Process: maltose metabolic process (GO:0000023);; Biological Process: pentose-phosphate shunt (GO:0006098);; Cellular Component: chloroplast (GO:0009507);; Biological Process: starch biosynthetic process (GO:0019252);; Molecular Function: heat shock protein binding (GO:0031072);; Molecular Function: unfolded protein binding (GO:0051082);;	--	--	--	--	--	--	S	Function unknown	unknown [Picea sitchensis]
Gb_17798	4.63646	315	5.45469	505	4.89944	509	1.69697	237	1.80431	134	1.19973	84	1.95891e-06	1.63748	up	--	--	Cellular Component: cell wall (GO:0005618);; Molecular Function: pectinesterase activity (GO:0030599);; Biological Process: cell wall modification (GO:0042545);; Molecular Function: aspartyl esterase activity (GO:0045330);;	--	--	--	--	Pectinesterase	Probable pectinesterase 53 (Precursor) GN=T29J13.150 OS=Arabidopsis thaliana (Mouse-ear cress) PE=2 SV=1	G	Carbohydrate transport and metabolism	PREDICTED: probable pectinesterase 53 isoform X2 [Elaeis guineensis]
Gb_40648	3.81003	509	3.60202	689	4.31349	873	1.04239	297	1.55788	213	1.27683	164	5.36667e-09	1.63726	up	[G]	Carbohydrate transport and metabolism	Biological Process: maltose metabolic process (GO:0000023);; Molecular Function: phosphoacetylglucosamine mutase activity (GO:0004610);; Cellular Component: cytosol (GO:0005829);; Biological Process: UDP-N-acetylglucosamine biosynthetic process (GO:0006048);; Cellular Component: chloroplast stroma (GO:0009570);; Biological Process: starch biosynthetic process (GO:0019252);; Biological Process: ce…	--	--	[G]	Carbohydrate transport and metabolism	Phosphoglucomutase/phosphomannomutase, alpha/beta/alpha domain II;; Phosphoglucomutase/phosphomannomutase, alpha/beta/alpha domain III	--	G	Carbohydrate transport and metabolism	PREDICTED: uncharacterized protein LOC104609970 [Nelumbo nucifera]
Gb_30186	49.2402	5141	43.1319	6019	38.613	6096	14.0529	3004	14.7436	1682	12.3927	1301	2.89687e-12	1.63694	up	--	--	--	--	--	[C]	Energy production and conversion	Mitochondrial glycoprotein	Uncharacterized protein At2g39795, mitochondrial (Precursor) GN=At2g39795 OS=Arabidopsis thaliana (Mouse-ear cress) PE=2 SV=1	C	Energy production and conversion	unknown [Picea sitchensis]
NG_20393	1.87718	113	1.18233	95	1.9761	179	0.402644	50	0.678634	45	0.485719	30	0.000650088	1.63566	up	--	--	--	--	--	--	--	Lateral organ boundaries (LOB) domain	LOB domain-containing protein 4 OS=Arabidopsis thaliana OX=3702 GN=LBD4 PE=1 SV=1	S	Function unknown	PREDICTED: LOB domain-containing protein 4-like [Lupinus angustifolius]
Gb_19142	2.56359	222	1.4478	168	1.5593	204	0.759709	135	0.608563	58	0.376637	33	0.0148368	1.63431	up	--	--	Molecular Function: transferase activity (GO:0016740);;	--	--	[GC]	Carbohydrate transport and metabolism;; Energy production and conversion	UDP-glucoronosyl and UDP-glucosyl transferase	UDP-glycosyltransferase 92A1 GN=UGT92A1 OS=Arabidopsis thaliana (Mouse-ear cress) PE=2 SV=1	CG	Energy production and conversion;; Carbohydrate transport and metabolism	unknown [Picea sitchensis]
Gb_19144	5.07578	497	4.22693	553	4.20199	622	1.25635	252	2.02882	217	0.982365	97	1.57645e-07	1.6306	up	--	--	Molecular Function: transferase activity, transferring glycosyl groups (GO:0016757);;	--	--	[GC]	Carbohydrate transport and metabolism;; Energy production and conversion	UDP-glucoronosyl and UDP-glucosyl transferase	UDP-glycosyltransferase 92A1 GN=UGT92A1 OS=Arabidopsis thaliana (Mouse-ear cress) PE=2 SV=1	CG	Energy production and conversion;; Carbohydrate transport and metabolism	unknown [Picea sitchensis]
Gb_24825	1.71289	236	1.88299	347	1.70741	356	0.649855	183	0.557899	84	0.462462	64	3.59987e-05	1.62875	up	--	--	--	--	--	[R]	General function prediction only	PPR repeat;; PPR repeat family;; PPR repeat;; Pentatricopeptide repeat domain;; DYW family of nucleic acid deaminases;; Tetratricopeptide repeat	Pentatricopeptide repeat-containing protein At2g22070 GN=PCMP-H41 OS=Arabidopsis thaliana (Mouse-ear cress) PE=3 SV=1	R	General function prediction only	unknown [Picea sitchensis]
Gb_37745	24.8286	1413	21.1243	1606	20.3351	1748	6.79109	791	7.07557	439	7.1198	408	4.17901e-14	1.62846	up	--	--	--	K12832|4.58255e-60|obr:102710325|K12832 splicing factor 3B subunit 5 | (RefSeq) uncharacterized protein At4g14342	Spliceosome (ko03040)	[S]	Function unknown	Splicing factor 3B subunit 10 (SF3b10)	Uncharacterized protein At4g14342 GN=At4g14342 OS=Arabidopsis thaliana (Mouse-ear cress) PE=3 SV=1	S	Function unknown	PREDICTED: uncharacterized protein At4g14342-like [Oryza brachyantha]
Gb_36661	6.09886	145	3.2641	104	3.4089	122	1.28603	63	1.19266	31	1.58636	38	0.0170075	1.62502	up	[B]	Chromatin structure and dynamics	Cellular Component: nucleosome (GO:0000786);; Molecular Function: DNA binding (GO:0003677);; Cellular Component: nucleus (GO:0005634);; Biological Process: nucleosome assembly (GO:0006334);; Biological Process: cell proliferation (GO:0008283);; Cellular Component: plastid (GO:0009536);; Molecular Function: protein heterodimerization activity (GO:0046982);;	K11253|3.73047e-92|crb:CARUB_v10021660mg|K11253 histone H3 | (RefSeq) hypothetical protein	--	[B]	Chromatin structure and dynamics	Core histone H2A/H2B/H3/H4	Histone H3.2 OS=Triticum aestivum (Wheat) PE=1 SV=2	B	Chromatin structure and dynamics	hypothetical protein CARUB_v10021660mg, partial [Capsella rubella]
Gb_28695	8.46394	632	8.97855	890	10.2332	1152	3.1989	477	2.48439	222	2.96641	215	7.55234e-10	1.62446	up	--	--	Molecular Function: hydrolase activity, acting on ester bonds (GO:0016788);;	--	--	--	--	GDSL-like Lipase/Acylhydrolase	GDSL esterase/lipase At1g71691 (Precursor) GN=At1g71691 OS=Arabidopsis thaliana (Mouse-ear cress) PE=2 SV=1	R	General function prediction only	hypothetical protein SELMODRAFT_87116 [Selaginella moellendorffii]
Gb_15588	1.71347	232	1.30939	237	1.15336	236	0.605134	168	0.31227	47	0.396106	54	0.000442386	1.62328	up	--	--	--	--	--	[R]	General function prediction only	PPR repeat family;; PPR repeat;; Pentatricopeptide repeat domain;; PPR repeat;; DYW family of nucleic acid deaminases	Pentatricopeptide repeat-containing protein At4g33170 GN=PCMP-H53 OS=Arabidopsis thaliana (Mouse-ear cress) PE=3 SV=1	R	General function prediction only	pentatricopeptide repeat protein 65 [Funaria hygrometrica]
NG_14586	0.911451	76	0.602732	67	0.64113	80	0.245263	42	0.187884	17	0.244799	21	0.00684646	1.62297	up	[R]	General function prediction only	Molecular Function: pinoresinol reductase activity (GO:0010283);; Molecular Function: lariciresinol reductase activity (GO:0010284);; Biological Process: oxidation-reduction process (GO:0055114);; Biological Process: (-)-pinoresinol catabolic process (GO:1902123);; Biological Process: (+)-pinoresinol catabolic process (GO:1902125);; Biological Process: (-)-lariciresinol catabolic process (GO:1902…	--	--	--	--	NmrA-like family;; NAD(P)H-binding;; NAD dependent epimerase/dehydratase family;; 3-beta hydroxysteroid dehydrogenase/isomerase family	Bifunctional pinoresinol-lariciresinol reductase 2 OS=Thuja plicata OX=3316 GN=PLR_Tp2 PE=1 SV=1	GM	Carbohydrate transport and metabolism;; Cell wall/membrane/envelope biogenesis	RecName: Full=Bifunctional pinoresinol-lariciresinol reductase 2; Short=PLR-Tp2; AltName: Full=(+)-lariciresinol reductase; AltName: Full=(+)-pinoresinol reductase; AltName: Full=(-)-pinoresinol reductase
Gb_21015	10.3109	1482	10.2948	1978	9.56303	2079	3.76065	1107	3.51593	553	2.24481	325	3.54914e-14	1.62268	up	--	--	--	--	--	--	--	NPH3 family;; BTB/POZ domain	BTB/POZ domain-containing protein At5g48130 GN=At5g48130 OS=Arabidopsis thaliana (Mouse-ear cress) PE=2 SV=1	R	General function prediction only	hypothetical protein SELMODRAFT_81263, partial [Selaginella moellendorffii]
Gb_11181	98.1833	1898	95.2994	2462	104.094	3043	27.1463	1074	36.4569	770	30.9314	602	3.16173e-18	1.62162	up	--	--	--	--	--	--	--	--	--	--	--	--
Gb_07098	23.7854	1401	16.0909	1267	10.9443	975	5.81826	702	5.44233	351	4.9609	294	0.0217033	1.62101	up	--	--	--	--	--	--	--	--	--	--	--	--
Gb_04492	5.71459	1096	5.42842	1391	4.77935	1386	1.75576	689	1.70129	357	1.60328	309	3.70884e-12	1.61992	up	--	--	--	--	--	--	--	Plant organelle RNA recognition domain	Protein ROOT PRIMORDIUM DEFECTIVE 1 GN=RPD1 OS=Arabidopsis thaliana (Mouse-ear cress) PE=1 SV=1	S	Function unknown	hypothetical protein AMTR_s00017p00179100 [Amborella trichopoda]
Gb_16923	23.3467	2013	16.3859	1890	15.3279	2009	5.26742	934	6.06342	569	6.34436	548	8.73696e-05	1.61901	up	[R]	General function prediction only	Biological Process: microtubule cytoskeleton organization (GO:0000226);; Molecular Function: GTP binding (GO:0005525);; Cellular Component: nucleolus (GO:0005730);; Cellular Component: spindle (GO:0005819);; Cellular Component: plasma membrane (GO:0005886);; Biological Process: small GTPase mediated signal transduction (GO:0007264);; Biological Process: response to light stimulus (GO:0009416);; C…	K04392|1.9048e-123|ppp:PHYPADRAFT_188969|K04392 Ras-related C3 botulinum toxin substrate 1 | (RefSeq) hypothetical protein	Phagosome (ko04145);; AGE-RAGE signaling pathway in diabetic complications (ko04933)	[R]	General function prediction only	Ras family;; Miro-like protein	Rac-like GTP-binding protein 5 (Precursor) OS=Oryza sativa subsp. japonica (Rice) PE=2 SV=2	R	General function prediction only	unknown [Picea sitchensis]
Gb_32945	2.68966	340	3.09464	534	3.04978	514	1.17903	295	0.844825	130	0.709233	79	4.54379e-06	1.61625	up	--	--	--	--	--	--	--	--	Polygalacturonase non-catalytic subunit AroGP3 (Precursor) GN=GP3 OS=Solanum lycopersicum (Tomato) PE=3 SV=1	R	General function prediction only	unknown [Picea sitchensis]
Gb_14675	3.44586	277	2.91509	313	2.70961	329	0.968568	159	1.17961	104	0.741104	60	3.57354e-05	1.6161	up	--	--	--	--	--	--	--	--	Transcription factor PAR2 GN=T20N10.200 OS=Arabidopsis thaliana (Mouse-ear cress) PE=3 SV=1	K	Transcription	unknown [Picea sitchensis]
NG_18235	2.86598	183	2.99611	260	2.65632	254	0.887131	120	0.896203	64	0.884026	57	0.000130903	1.61505	up	--	--	--	--	--	--	--	--	--	--	--	--
NG_20010	12.8417	1433	10.9189	1628	10.3461	1745	3.83753	877	3.57521	436	3.47368	390	5.64543e-13	1.61383	up	--	--	Molecular Function: binding (GO:0005488);; Biological Process: metabolic process (GO:0008152);; Biological Process: cellular process (GO:0009987);; Molecular Function: oxidoreductase activity (GO:0016491);; Biological Process: response to stimulus (GO:0050896);;	K00430|1.7711e-125|bvg:104896205|K00430 peroxidase [EC:1.11.1.7] | (RefSeq) peroxidase 12-like	Phenylpropanoid biosynthesis (ko00940)	--	--	Peroxidase	Peroxidase 12 OS=Arabidopsis thaliana OX=3702 GN=PER12 PE=1 SV=1	G	Carbohydrate transport and metabolism	unknown [Picea sitchensis]
Gb_21250	4.5967	233	5.61876	413	4.54636	440	0.985655	137	1.94432	137	1.27754	74	2.64529e-06	1.61361	up	--	--	Molecular Function: zinc ion binding (GO:0008270);;	--	--	--	--	--	--	R	General function prediction only	Uncharacterized protein TCM_034473 [Theobroma cacao]
Gb_18914	1.64823	194	2.071	326	2.25208	401	0.718974	174	0.94797	122	0.21208	26	3.79269e-05	1.61342	up	--	--	--	--	--	[R]	General function prediction only	PPR repeat family;; PPR repeat;; Pentatricopeptide repeat domain;; PPR repeat;; DYW family of nucleic acid deaminases;; Tetratricopeptide repeat	Pentatricopeptide repeat-containing protein At3g57430, chloroplastic (Precursor) GN=PCMP-H81 OS=Arabidopsis thaliana (Mouse-ear cress) PE=2 SV=2	R	General function prediction only	unknown [Picea sitchensis]
Gb_12644	1.36858	211	1.15294	231	1.28387	277	0.462149	134	0.535673	70	0.424629	52	0.00016519	1.61083	up	--	--	--	--	--	--	--	--	--	S	Function unknown	PREDICTED: uncharacterized protein LOC100242886 [Vitis vinifera]
Gb_06006	1.7376	60	4.66689	215	4.23928	221	1.09006	77	1.28458	49	0.961272	34	0.0111248	1.6104	up	[R]	General function prediction only	Molecular Function: oxidoreductase activity, acting on paired donors, with incorporation or reduction of molecular oxygen, 2-oxoglutarate as one donor, and incorporation of one atom each of oxygen into both donors (GO:0016706);; Biological Process: single-organism metabolic process (GO:0044710);;	--	--	[QR]	Secondary metabolites biosynthesis, transport and catabolism;; General function prediction only	non-haem dioxygenase in morphine synthesis N-terminal	Flavonol synthase/flavanone 3-hydroxylase GN=FLS OS=Citrus unshiu (Satsuma mandarin) PE=1 SV=1	Q	Secondary metabolites biosynthesis, transport and catabolism	unknown [Picea sitchensis]
Gb_21938	21.8255	968	14.4342	856	14.379	965	6.0283	548	5.10867	248	5.09703	228	0.000589656	1.60881	up	[O]	Posttranslational modification, protein turnover, chaperones	Molecular Function: peroxidase activity (GO:0004601);; Cellular Component: plant-type cell wall (GO:0009505);; Cellular Component: chloroplast stroma (GO:0009570);; Cellular Component: thylakoid (GO:0009579);; Biological Process: defense response to bacterium (GO:0042742);; Molecular Function: peroxiredoxin activity (GO:0051920);; Biological Process: oxidation-reduction process (GO:0055114);;	--	--	[O]	Posttranslational modification, protein turnover, chaperones	Redoxin;; AhpC/TSA family	Peroxiredoxin-2E-1, chloroplastic (Precursor) OS=Oryza sativa subsp. japonica (Rice) PE=2 SV=1	O	Posttranslational modification, protein turnover, chaperones	unknown [Picea sitchensis]
Gb_08870	0.565106	79	0.909881	169	0.729595	154	0.176464	51	0.249613	38	0.274101	39	0.000508892	1.60844	up	[R]	General function prediction only	--	--	--	[R]	General function prediction only	Ankyrin repeats (3 copies);; Ankyrin repeat;; Ankyrin repeat;; Ankyrin repeats (many copies);; Ankyrin repeats (many copies);; Domain of unknown function	Ankyrin repeat-containing protein At3g12360 GN=At3g12360 OS=Arabidopsis thaliana (Mouse-ear cress) PE=2 SV=1	R	General function prediction only	PREDICTED: ankyrin repeat-containing protein At5g02620-like [Phoenix dactylifera]
Gb_06693	0.837597	153	0.827397	202	0.884773	245	0.240159	90	0.309969	62	0.263417	49	0.000176482	1.60842	up	--	--	--	--	--	[R]	General function prediction only	PPR repeat family;; PPR repeat;; PPR repeat;; Pentatricopeptide repeat domain;; DYW family of nucleic acid deaminases	Pentatricopeptide repeat-containing protein At4g13650 GN=PCMP-H42 OS=Arabidopsis thaliana (Mouse-ear cress) PE=2 SV=2	R	General function prediction only	PREDICTED: pentatricopeptide repeat-containing protein At2g39620 [Nelumbo nucifera]
Gb_16786	185.033	9685	159.171	11137	171.705	13591	57.674	6180	59.0582	3377	48.4615	2551	1.98029e-21	1.60821	up	--	--	--	--	--	--	--	Aluminium induced protein;; Glutamine amidotransferase domain	Stem-specific protein TSJT1 GN=TSJT1 OS=Nicotiana tabacum (Common tobacco) PE=2 SV=1	S	Function unknown	unknown [Picea sitchensis]
Gb_20887	1.55358	178	1.72279	235	1.08728	180	0.514068	111	0.332036	46	0.523124	56	0.000419994	1.6061	up	[P]	Inorganic ion transport and metabolism	Biological Process: purine nucleobase transport (GO:0006863);; Biological Process: cellular ion homeostasis (GO:0006873);; Molecular Function: voltage-gated anion channel activity (GO:0008308);; Biological Process: response to humidity (GO:0009270);; Biological Process: response to abscisic acid (GO:0009737);; Biological Process: response to carbon dioxide (GO:0010037);; Biological Process: stoma…	--	--	--	--	Voltage-dependent anion channel	Guard cell S-type anion channel SLAC1 OS=Arabidopsis thaliana (Mouse-ear cress) PE=1 SV=1	P	Inorganic ion transport and metabolism	Guard cell S-type anion channel SLAC1 [Morus notabilis]
Gb_37176	3.36692	443	3.50601	616	3.54304	704	1.01628	274	1.1707	168	1.16501	154	9.76304e-08	1.60219	up	--	--	--	--	--	[R]	General function prediction only	PPR repeat family;; PPR repeat;; PPR repeat;; Pentatricopeptide repeat domain;; DYW family of nucleic acid deaminases;; Tetratricopeptide repeat	Pentatricopeptide repeat-containing protein At2g22070 GN=PCMP-H41 OS=Arabidopsis thaliana (Mouse-ear cress) PE=3 SV=1	R	General function prediction only	unknown [Picea sitchensis]
Gb_23058	3.0635	123	2.66346	142	2.92251	177	0.733588	60	0.785969	35	1.25923	51	0.000508892	1.60108	up	--	--	Biological Process: protein peptidyl-prolyl isomerization (GO:0000413);; Molecular Function: peptidyl-prolyl cis-trans isomerase activity (GO:0003755);; Biological Process: protein folding (GO:0006457);;	--	--	--	--	Protein of unknown function, DUF617	Protein MIZU-KUSSEI 1 GN=MIZ1 OS=Arabidopsis thaliana (Mouse-ear cress) PE=1 SV=1	S	Function unknown	hypothetical protein SELMODRAFT_167931 [Selaginella moellendorffii]
Gb_27797	0.870134	150	1.12901	260	1.00308	261	0.248483	88	0.439193	83	0.275951	48	7.345e-05	1.6004	up	--	--	--	--	--	[R]	General function prediction only	PPR repeat family;; PPR repeat;; PPR repeat;; Pentatricopeptide repeat domain;; DYW family of nucleic acid deaminases	Pentatricopeptide repeat-containing protein At4g13650 GN=PCMP-H42 OS=Arabidopsis thaliana (Mouse-ear cress) PE=2 SV=2	R	General function prediction only	PREDICTED: pentatricopeptide repeat-containing protein At5g04780-like isoform X1 [Nelumbo nucifera]
Gb_02414	4.69727	499	4.6883	667	6.37143	1019	1.60747	356	1.92183	226	1.4525	157	8.83682e-09	1.59992	up	--	--	Cellular Component: mitochondrial envelope (GO:0005740);; Biological Process: respiratory gaseous exchange (GO:0007585);; Biological Process: response to cold (GO:0009409);; Molecular Function: alternative oxidase activity (GO:0009916);; Cellular Component: integral component of membrane (GO:0016021);; Biological Process: electron transport chain (GO:0022900);; Biological Process: mitochondria-nu…	K17893|1.69577e-113|cam:101504014|K17893 ubiquinol oxidase [EC:1.10.3.11] | (RefSeq) ubiquinol oxidase 1, mitochondrial-like	--	--	--	Alternative oxidase	Ubiquinol oxidase 1a, mitochondrial (Precursor) GN=MCB17.11 OS=Arabidopsis thaliana (Mouse-ear cress) PE=1 SV=2	C	Energy production and conversion	mitochondrial alternative oxidase 1 [Litchi chinensis]
Gb_39514	1.7751	291	1.48446	325	0.903473	224	0.502023	169	0.508345	91	0.333112	55	0.00695495	1.59957	up	--	--	--	--	--	[R]	General function prediction only	PPR repeat family;; PPR repeat;; Pentatricopeptide repeat domain;; PPR repeat;; DYW family of nucleic acid deaminases;; Tetratricopeptide repeat	Pentatricopeptide repeat-containing protein At3g03580 GN=PCMP-H23 OS=Arabidopsis thaliana (Mouse-ear cress) PE=2 SV=1	R	General function prediction only	unknown [Picea sitchensis]
Gb_28665	1.08334	157	0.679742	131	0.935948	204	0.121794	36	0.452756	72	0.300727	44	0.000198395	1.59943	up	--	--	--	--	--	[R]	General function prediction only	PPR repeat;; PPR repeat family;; PPR repeat;; Pentatricopeptide repeat domain;; DYW family of nucleic acid deaminases;; Tetratricopeptide repeat;; Tetratricopeptide repeat;; Bacterial transcriptional activator domain;; Tetratricopeptide repeat;; Vacuolar sorting protein 39 domain 1	Pentatricopeptide repeat-containing protein At1g11290 GN=T28P6.20 OS=Arabidopsis thaliana (Mouse-ear cress) PE=2 SV=1	R	General function prediction only	unknown [Picea sitchensis]
Gb_06012	945.094	110997	667.923	104863	486.576	86423	244.352	58749	225.683	28957	210.597	24869	0.00806577	1.59873	up	--	--	Molecular Function: adenosylmethionine decarboxylase activity (GO:0004014);; Biological Process: S-adenosylmethioninamine biosynthetic process (GO:0006557);; Biological Process: spermine biosynthetic process (GO:0006597);; Biological Process: spermidine biosynthetic process (GO:0008295);;	K01611|2.67024e-147|vvi:100240686|K01611 S-adenosylmethionine decarboxylase [EC:4.1.1.50] | (RefSeq) SAMDC; S-adenosylmethionine decarboxylase proenzyme	Cysteine and methionine metabolism (ko00270);; Arginine and proline metabolism (ko00330)	[T]	Signal transduction mechanisms	Adenosylmethionine decarboxylase;; S-adenosyl-l-methionine decarboxylase leader peptide	S-adenosylmethionine decarboxylase beta chain (Precursor) GN=SAMDC OS=Ipomoea nil (Japanese morning glory) PE=3 SV=1	E	Amino acid transport and metabolism	putative S-adenosyl methionine decarboxylase [Pinus sylvestris]
Gb_34690	3.81578	341	4.67236	568	5.05172	659	1.38289	255	1.60526	160	1.26316	116	3.71534e-07	1.59848	up	--	--	--	--	--	--	--	Protein of unknown function (DUF506)	--	S	Function unknown	unknown [Picea sitchensis]
Gb_28780	0.855532	127	1.00558	200	0.783966	176	0.159271	49	0.605831	99	0.086393	13	0.00134714	1.59714	up	--	--	--	--	--	[R]	General function prediction only	PPR repeat family;; PPR repeat;; Pentatricopeptide repeat domain;; PPR repeat;; DYW family of nucleic acid deaminases	Pentatricopeptide repeat-containing protein At4g13650 GN=PCMP-H42 OS=Arabidopsis thaliana (Mouse-ear cress) PE=2 SV=2	R	General function prediction only	predicted protein [Physcomitrella patens]
Gb_07831	10.4209	1206	11.0417	1708	9.554	1672	3.30249	782	3.75662	475	2.96285	345	2.01131e-13	1.59564	up	--	--	Molecular Function: catalytic activity (GO:0003824);; Biological Process: metabolic process (GO:0008152);;	--	--	[V]	Defense mechanisms	Lanthionine synthetase C-like protein	LanC-like protein GCL1 GN=GCL1 OS=Arabidopsis thaliana (Mouse-ear cress) PE=2 SV=1	V	Defense mechanisms	unknown [Picea sitchensis]
Gb_34707	4.7674	713	3.39304	700	3.56119	845	1.27998	410	1.2662	216	1.17213	185	1.55893e-07	1.59441	up	[O]	Posttranslational modification, protein turnover, chaperones	Biological Process: nitrogen compound metabolic process (GO:0006807);; Molecular Function: amino acid binding (GO:0016597);; Molecular Function: transferase activity, transferring glycosyl groups (GO:0016757);; Biological Process: carboxylic acid metabolic process (GO:0019752);;	--	--	--	--	ACT domain;; ACT domain;; ACT domain	ACT domain-containing protein ACR3 {ECO:0000305} OS=Arabidopsis thaliana (Mouse-ear cress) PE=2 SV=1	R	General function prediction only	unknown [Picea sitchensis]
Gb_33340	0.603072	70	0.528003	85	0.667813	85	0.257621	49	0.224579	17	0.20874	22	0.00704729	1.59355	up	--	--	--	K13456|4.33985e-21|sot:102583531|K13456 RPM1-interacting protein 4 | (RefSeq) RPM1-interacting protein 4-like	Plant-pathogen interaction (ko04626)	--	--	Cleavage site for pathogenic type III effector avirulence factor Avr	RPM1-interacting protein 4 GN=RIN4 OS=Arabidopsis thaliana (Mouse-ear cress) PE=1 SV=1	S	Function unknown	unknown [Picea sitchensis]
Gb_15015	0.965902	144	0.950908	189	1.2467	280	0.241795	74	0.448375	73	0.334116	50	9.43296e-05	1.59251	up	--	--	Molecular Function: iron ion binding (GO:0005506);; Molecular Function: linoleate 13S-lipoxygenase activity (GO:0016165);; Biological Process: oxylipin biosynthetic process (GO:0031408);; Biological Process: oxidation-reduction process (GO:0055114);;	K15718|0|vvi:100232917|K15718 linoleate 9S-lipoxygenase [EC:1.13.11.58] | (RefSeq) LOX, LOX1, LOXC; lipoxygenase	Linoleic acid metabolism (ko00591)	--	--	Lipoxygenase;; PLAT/LH2 domain	Probable linoleate 9S-lipoxygenase 5 GN=LOX1.5 OS=Solanum tuberosum (Potato) PE=2 SV=1	S	Function unknown	lipoxygenase 1 [Taxus wallichiana var. chinensis]
Gb_17952	3.11684	236	3.64454	374	2.78326	321	0.905182	141	1.17885	96	1.02316	80	2.04184e-05	1.59219	up	[HC]	Coenzyme transport and metabolism;; Energy production and conversion	--	--	--	[CR]	Energy production and conversion;; General function prediction only	FAD binding domain;; Lycopene cyclase protein;; FAD dependent oxidoreductase;; FAD binding domain	Zeaxanthin epoxidase, chloroplastic (Precursor) GN=ZEP OS=Oncidium hybrid cultivar (Orchid) PE=2 SV=1	C	Energy production and conversion	unknown [Picea sitchensis]
Gb_25089	29.7435	2638	26.4183	3133	26.1088	3502	8.90052	1616	9.30991	903	8.46365	755	2.31809e-17	1.59182	up	[O]	Posttranslational modification, protein turnover, chaperones	Cellular Component: nucleolus (GO:0005730);; Cellular Component: mitochondrion (GO:0005739);; Cellular Component: vacuole (GO:0005773);; Cellular Component: plasma membrane (GO:0005886);; Biological Process: mitochondrion organization (GO:0007005);; Cellular Component: plant-type cell wall (GO:0009505);; Cellular Component: chloroplast (GO:0009507);; Biological Process: response to salt stress (G…	K17080|4.16582e-132|csv:101207325|K17080 prohibitin 1 | (RefSeq) prohibitin-3, mitochondrial	--	[O]	Posttranslational modification, protein turnover, chaperones	SPFH domain / Band 7 family	Prohibitin-3, mitochondrial GN=K1B16.2 OS=Arabidopsis thaliana (Mouse-ear cress) PE=1 SV=1	O	Posttranslational modification, protein turnover, chaperones	PREDICTED: prohibitin-1, mitochondrial-like isoform 1 [Cucumis sativus]
Gb_13606	1.47908	209	1.36972	258	1.31354	280	0.42425	123	0.462108	72	0.457232	65	9.85245e-05	1.59164	up	--	--	--	--	--	[R]	General function prediction only	PPR repeat;; PPR repeat family;; PPR repeat;; Pentatricopeptide repeat domain;; DYW family of nucleic acid deaminases;; Tetratricopeptide repeat;; Tetratricopeptide repeat;; Tetratricopeptide repeat;; Tetratricopeptide repeat;; Tetratricopeptide repeat	Pentatricopeptide repeat-containing protein At4g02750 GN=PCMP-H24 OS=Arabidopsis thaliana (Mouse-ear cress) PE=3 SV=1	S	Function unknown	unknown [Picea sitchensis]
Gb_05339	0.754194	66	1.28727	150	1.23962	163	0.321137	58	0.33525	32	0.390724	35	0.000910284	1.58938	up	--	--	Molecular Function: transcription factor activity, sequence-specific DNA binding (GO:0003700);; Cellular Component: nucleus (GO:0005634);; Biological Process: regulation of transcription, DNA-templated (GO:0006355);; Biological Process: procambium histogenesis (GO:0010067);; Molecular Function: sequence-specific DNA binding (GO:0043565);;	--	--	--	--	Homeobox domain	WUSCHEL-related homeobox 4 GN=WOX4 OS=Arabidopsis thaliana (Mouse-ear cress) PE=2 SV=1	K	Transcription	HD transcription factor [Ginkgo biloba]
Gb_23487	11.9486	850	10.4525	994	9.96261	1072	3.40461	496	3.55869	277	3.5651	255	4.32413e-10	1.58846	up	[H]	Coenzyme transport and metabolism	Biological Process: sulfur amino acid metabolic process (GO:0000096);; Biological Process: glycine catabolic process (GO:0006546);; Biological Process: unsaturated fatty acid biosynthetic process (GO:0006636);; Biological Process: oxidoreduction coenzyme metabolic process (GO:0006733);; Biological Process: cellular amino acid biosynthetic process (GO:0008652);; Biological Process: aromatic amino …	K09833|2.28603e-154|fve:101307294|K09833 homogentisate phytyltransferase / homogentisate geranylgeranyltransferase [EC:2.5.1.115 2.5.1.116] | (RefSeq) homogentisate phytyltransferase 1, chloroplastic	Ubiquinone and other terpenoid-quinone biosynthesis (ko00130)	--	--	UbiA prenyltransferase family	Probable homogentisate phytyltransferase 1, chloroplastic (Precursor) OS=Oryza sativa subsp. japonica (Rice) PE=2 SV=1	H	Coenzyme transport and metabolism	hypothetical protein JCGZ_10362 [Jatropha curcas]
NG_15147	2.4682	147	2.34703	178	1.63072	157	0.52603	69	1.01532	71	0.525434	27	0.000605549	1.58608	up	--	--	Molecular Function: DNA binding (GO:0003677);; Cellular Component: nucleus (GO:0005634);;	--	--	--	--	Homeobox domain	WUSCHEL-related homeobox 3 OS=Arabidopsis thaliana OX=3702 GN=WOX3 PE=1 SV=1	--	--	putative wuschel homeobox protein WOX3A, partial [Ginkgo biloba]
Gb_15247	6.46791	1300	6.40296	1707	6.03643	1905	2.05355	853	2.06784	440	2.09645	431	8.01037e-14	1.58607	up	--	--	Molecular Function: DNA binding (GO:0003677);; Cellular Component: nucleus (GO:0005634);; Biological Process: regulation of transcription, DNA-templated (GO:0006355);; Biological Process: response to hormone (GO:0009725);; Molecular Function: protein dimerization activity (GO:0046983);;	--	--	--	--	Auxin response factor;; AUX/IAA family;; B3 DNA binding domain	Auxin response factor 3 GN=T1B8.30 OS=Arabidopsis thaliana (Mouse-ear cress) PE=1 SV=2	K	Transcription	ARF-L2 protein [Ginkgo biloba]
Gb_03592	4.17946	588	3.94704	742	2.03532	433	1.21134	349	1.04946	162	1.0658	151	0.00942741	1.57951	up	[J]	Translation, ribosomal structure and biogenesis	Molecular Function: methyltransferase activity (GO:0008168);; Biological Process: rRNA methylation (GO:0031167);;	--	--	--	--	Conserved hypothetical protein 95;; tRNA (Uracil-5-)-methyltransferase	--	R	General function prediction only	hypothetical protein AMTR_s00013p00233820 [Amborella trichopoda]
Gb_07402	97.4086	6672	65.2923	5987	68.7689	7226	26.4857	3715	26.472	1980	23.2906	1606	8.61375e-05	1.57884	up	--	--	Molecular Function: structural constituent of ribosome (GO:0003735);; Cellular Component: ribosome (GO:0005840);; Biological Process: translation (GO:0006412);; Cellular Component: chloroplast thylakoid membrane (GO:0009535);; Biological Process: thylakoid membrane organization (GO:0010027);; Molecular Function: rRNA binding (GO:0019843);; Biological Process: ribosome biogenesis (GO:0042254);;	K02990|8.51042e-34|pda:103719111|K02990 small subunit ribosomal protein S6 | (RefSeq) 30S ribosomal protein S6 alpha, chloroplastic	Ribosome (ko03010)	--	--	Ribosomal protein S6	30S ribosomal protein S6 alpha, chloroplastic (Precursor) GN=RPS6 OS=Arabidopsis thaliana (Mouse-ear cress) PE=2 SV=1	J	Translation, ribosomal structure and biogenesis	unknown [Picea sitchensis]
NG_19417	0.752258	81	0.756408	117	1.02339	168	0.210931	53	0.334696	40	0.265239	29	0.00110202	1.57817	up	--	--	Biological Process: guard cell differentiation (GO:0010052);;	--	--	--	--	Epidermal patterning factor proteins	EPIDERMAL PATTERNING FACTOR-like protein 4 OS=Arabidopsis thaliana OX=3702 GN=EPFL4 PE=1 SV=1	S	Function unknown	PREDICTED: EPIDERMAL PATTERNING FACTOR-like protein 4 isoform X1 [Nicotiana tomentosiformis]
Gb_09762	95.8095	4679	83.455	5448	79.6333	5881	31.1227	3112	28.3815	1515	25.2831	1242	1.29854e-14	1.57546	up	[O]	Posttranslational modification, protein turnover, chaperones	Cellular Component: membrane (GO:0016020);;	K17080|1.7098e-144|sot:102583869|K17080 prohibitin 1 | (RefSeq) prohibitin-3, mitochondrial-like	--	[O]	Posttranslational modification, protein turnover, chaperones	SPFH domain / Band 7 family	Prohibitin-3, mitochondrial GN=K1B16.2 OS=Arabidopsis thaliana (Mouse-ear cress) PE=1 SV=1	O	Posttranslational modification, protein turnover, chaperones	PREDICTED: prohibitin-3, mitochondrial-like [Nicotiana sylvestris]
Gb_12969	5.53325	422	4.41026	450	4.5815	529	2.29988	360	1.83508	153	0.58586	45	0.000168861	1.57476	up	--	--	--	--	--	[KR]	Transcription;; General function prediction only	mTERF	--	K	Transcription	hypothetical protein AMTR_s00010p00225110 [Amborella trichopoda]
Gb_33830	0.554727	60	0.940685	134	0.566311	92	0.184017	41	0.229603	27	0.259582	28	0.00232804	1.57425	up	[RTKL]	General function prediction only;; Signal transduction mechanisms;; Transcription;; Replication, recombination and repair	Molecular Function: transferase activity, transferring phosphorus-containing groups (GO:0016772);;	K04733|0|vvi:100264391|K04733 interleukin-1 receptor-associated kinase 4 [EC:2.7.11.1] | (RefSeq) probable receptor-like protein kinase At1g11050	--	[T]	Signal transduction mechanisms	Protein kinase domain;; Protein tyrosine kinase	Probable receptor-like protein kinase At1g11050 (Precursor) GN=At1g11050 OS=Arabidopsis thaliana (Mouse-ear cress) PE=2 SV=1	T	Signal transduction mechanisms	PREDICTED: probable receptor-like protein kinase At1g11050 [Nelumbo nucifera]
Gb_31330	9.89688	445	6.43489	400	7.78015	555	2.42259	220	2.26099	118	3.2983	153	3.88571e-06	1.56979	up	--	--	--	--	--	--	--	Protein of unknown function (DUF1997)	--	S	Function unknown	unknown [Picea sitchensis]
NG_2748	1.01093	65	2.40482	204	1.27855	123	0.583625	76	0.373172	26	0.580624	37	0.0321239	1.56944	up	--	--	--	--	--	--	--	--	--	--	--	--
Gb_14108	1.64999	81	1.6197	106	1.90322	141	0.449283	45	0.653307	35	0.603069	30	0.0015814	1.5652	up	--	--	--	--	--	--	--	--	--	S	Function unknown	hypothetical protein AMTR_s00092p00107280 [Amborella trichopoda]
Gb_26651	1.69457	212	1.39618	234	1.45983	276	0.507097	130	0.502599	69	0.48801	62	0.000195832	1.56453	up	--	--	Biological Process: meiotic cell cycle (GO:0007126);; Biological Process: nucleic acid metabolic process (GO:0090304);;	--	--	[R]	General function prediction only	PPR repeat family;; PPR repeat;; PPR repeat;; Pentatricopeptide repeat domain;; Tetratricopeptide repeat	Pentatricopeptide repeat-containing protein At1g11290 GN=T28P6.20 OS=Arabidopsis thaliana (Mouse-ear cress) PE=2 SV=1	R	General function prediction only	unknown [Picea sitchensis]
Gb_01725	0.535561	98	0.551549	135	0.916524	155	0.170093	64	0.127086	26	0.244895	45	0.00136703	1.5624	up	--	--	Molecular Function: G-protein coupled receptor activity (GO:0004930);; Molecular Function: extracellular ligand-gated ion channel activity (GO:0005230);; Biological Process: transport (GO:0006810);; Biological Process: cell surface receptor signaling pathway (GO:0007166);; Cellular Component: membrane (GO:0016020);;	K05387|0|smo:SELMODRAFT_102172|K05387 glutamate receptor, ionotropic, plant | (RefSeq) hypothetical protein	--	[PET]	Inorganic ion transport and metabolism;; Amino acid transport and metabolism;; Signal transduction mechanisms	Receptor family ligand binding region;; Ligand-gated ion channel;; Bacterial extracellular solute-binding proteins, family 3;; Periplasmic binding protein	Glutamate receptor 3.3 (Precursor) GN=GLR3.3 OS=Arabidopsis thaliana (Mouse-ear cress) PE=2 SV=1	P	Inorganic ion transport and metabolism	hypothetical protein SELMODRAFT_102172 [Selaginella moellendorffii]
Gb_27618	11.8288	280	7.93126	251	6.90061	247	3.39601	165	3.19323	83	2.21007	53	0.00521715	1.56213	up	[B]	Chromatin structure and dynamics	Cellular Component: nucleosome (GO:0000786);; Molecular Function: DNA binding (GO:0003677);; Cellular Component: nucleus (GO:0005634);; Biological Process: nucleosome assembly (GO:0006334);; Biological Process: cell proliferation (GO:0008283);; Cellular Component: plastid (GO:0009536);; Molecular Function: protein heterodimerization activity (GO:0046982);;	K11253|3.73047e-92|crb:CARUB_v10021660mg|K11253 histone H3 | (RefSeq) hypothetical protein	--	[B]	Chromatin structure and dynamics	Core histone H2A/H2B/H3/H4	Histone H3.2 OS=Triticum aestivum (Wheat) PE=1 SV=2	B	Chromatin structure and dynamics	hypothetical protein CARUB_v10021660mg, partial [Capsella rubella]
Gb_41675	220.997	12660	196.718	15065	191.657	16604	63.6977	7470	71.4125	4470	67.1639	3869	1.87814e-21	1.56002	up	[F]	Nucleotide transport and metabolism	Molecular Function: ribonucleoside-diphosphate reductase activity, thioredoxin disulfide as acceptor (GO:0004748);; Cellular Component: ribonucleoside-diphosphate reductase complex (GO:0005971);; Biological Process: DNA-dependent DNA replication (GO:0006261);; Biological Process: DNA repair (GO:0006281);; Biological Process: multicellular organism development (GO:0007275);; Biological Process: nu…	K10808|0|vvi:100243004|K10808 ribonucleoside-diphosphate reductase subunit M2 [EC:1.17.4.1] | (RefSeq) ribonucleoside-diphosphate reductase small chain-like	Purine metabolism (ko00230);; Pyrimidine metabolism (ko00240);; Glutathione metabolism (ko00480)	[F]	Nucleotide transport and metabolism	Ribonucleotide reductase, small chain	Ribonucleoside-diphosphate reductase small chain OS=Nicotiana tabacum (Common tobacco) PE=2 SV=1	F	Nucleotide transport and metabolism	PREDICTED: ribonucleoside-diphosphate reductase small chain [Vitis vinifera]
Gb_37654	67.2244	9713	66.6683	12919	58.6723	12833	22.333	6639	21.3845	3389	19.7627	2899	3.00705e-20	1.55971	up	[O]	Posttranslational modification, protein turnover, chaperones	Molecular Function: copper ion binding (GO:0005507);; Molecular Function: ATP binding (GO:0005524);; Cellular Component: mitochondrial matrix (GO:0005759);; Cellular Component: vacuolar membrane (GO:0005774);; Cellular Component: Golgi apparatus (GO:0005794);; Biological Process: protein targeting to mitochondrion (GO:0006626);; Biological Process: response to heat (GO:0009408);; Biological Proce…	K04077|0|pda:103722141|K04077 chaperonin GroEL | (RefSeq) chaperonin CPN60-2, mitochondrial	RNA degradation (ko03018)	[O]	Posttranslational modification, protein turnover, chaperones	TCP-1/cpn60 chaperonin family	Chaperonin CPN60, mitochondrial (Precursor) GN=CPN60 OS=Arabidopsis thaliana (Mouse-ear cress) PE=2 SV=2	O	Posttranslational modification, protein turnover, chaperones	PREDICTED: chaperonin CPN60-2, mitochondrial [Phoenix dactylifera]
Gb_00387	2.07455	167	1.50502	161	1.83295	223	0.686342	114	0.590939	53	0.482433	40	0.000954762	1.55871	up	--	--	Cellular Component: cytoplasm (GO:0005737);; Biological Process: rRNA processing (GO:0006364);; Molecular Function: methyltransferase activity (GO:0008168);; Biological Process: methylation (GO:0032259);;	K00783|1.17343e-61|pda:103701473|K00783 23S rRNA (pseudouridine1915-N3)-methyltransferase [EC:2.1.1.177] | (RefSeq) putative RNA methyltransferase At5g10620	--	--	--	Predicted SPOUT methyltransferase	Putative RNA methyltransferase At5g10620 GN=At5g10620 OS=Arabidopsis thaliana (Mouse-ear cress) PE=3 SV=1	S	Function unknown	PREDICTED: putative RNA methyltransferase At5g10620 [Nelumbo nucifera]
Gb_17913	4.29604	766	5.32306	981	4.99219	1060	1.76431	508	1.40131	272	1.69917	234	1.83556e-09	1.55837	up	--	--	--	--	--	--	--	Protein of unknown function, DUF547;; Leucine-zipper of ternary complex factor MIP1	--	S	Function unknown	hypothetical protein AMTR_s00138p00069300 [Amborella trichopoda]
Gb_21046	1.76901	210	1.25029	199	1.46265	263	0.372521	91	0.549192	72	0.569712	68	0.00013397	1.55808	up	--	--	--	--	--	[R]	General function prediction only	PPR repeat family;; PPR repeat;; PPR repeat;; Pentatricopeptide repeat domain;; Tetratricopeptide repeat;; Tetratricopeptide repeat	Pentatricopeptide repeat-containing protein At1g11290 GN=T28P6.20 OS=Arabidopsis thaliana (Mouse-ear cress) PE=2 SV=1	R	General function prediction only	unknown [Picea sitchensis]
Gb_33704	35.5289	2477	25.7404	2399	21.3461	2251	10.4401	1490	8.39933	640	8.65512	607	0.00144858	1.55709	up	--	--	Biological Process: biosynthetic process (GO:0009058);; Molecular Function: transferase activity, transferring acyl groups other than amino-acyl groups (GO:0016747);;	K00660|3.28828e-137|pvu:PHAVU_002G039100g|K00660 chalcone synthase [EC:2.3.1.74] | (RefSeq) hypothetical protein	Flavonoid biosynthesis (ko00941);; Circadian rhythm - plant (ko04712)	--	--	Chalcone and stilbene synthases, N-terminal domain;; Chalcone and stilbene synthases, C-terminal domain;; FAE1/Type III polyketide synthase-like protein;; 3-Oxoacyl-[acyl-carrier-protein (ACP)] synthase III	Chalcone synthase 7 GN=CSF7 OS=Picea mariana (Black spruce) PE=2 SV=1	H	Coenzyme transport and metabolism	RecName: Full=Chalcone synthase 7; AltName: Full=Naregenin-chalcone synthase 7 [Picea mariana]
Gb_22407	6.27452	236	5.07264	241	4.42849	245	1.62729	123	1.80872	78	1.66417	62	0.000206361	1.55526	up	--	--	--	--	--	--	--	--	--	--	--	unknown [Picea sitchensis]
Gb_23279	1.27245	158	1.41583	234	1.64602	312	0.44851	119	0.521384	72	0.420168	55	0.000150243	1.55499	up	--	--	Biological Process: organelle organization (GO:0006996);; Biological Process: organic substance metabolic process (GO:0071704);;	--	--	--	--	Protein of unknown function (DUF1666)	--	S	Function unknown	PREDICTED: uncharacterized protein LOC104601547 [Nelumbo nucifera]
Gb_03507	28.8717	2835	26.4442	3471	24.5356	3643	9.26442	1862	9.0704	973	8.27209	817	1.43626e-16	1.5519	up	--	--	--	--	--	[R]	General function prediction only	PPR repeat;; PPR repeat family;; Pentatricopeptide repeat domain;; PPR repeat;; Tetratricopeptide repeat	Pentatricopeptide repeat-containing protein At4g02820, mitochondrial (Precursor) GN=At4g02820 OS=Arabidopsis thaliana (Mouse-ear cress) PE=2 SV=1	R	General function prediction only	unknown [Picea sitchensis]
Gb_34646	0.980964	245	1.13941	381	1.01806	384	0.233313	120	0.399653	109	0.416716	105	7.20168e-06	1.54977	up	[V]	Defense mechanisms	Molecular Function: ATP binding (GO:0005524);; Cellular Component: plasma membrane (GO:0005886);; Biological Process: obsolete ATP catabolic process (GO:0006200);; Biological Process: drug transmembrane transport (GO:0006855);; Biological Process: cuticle development (GO:0042335);; Molecular Function: ATPase activity, coupled to transmembrane movement of substances (GO:0042626);;	--	--	[Q]	Secondary metabolites biosynthesis, transport and catabolism	ABC-2 type transporter;; ABC transporter;; Plant PDR ABC transporter associated;; AAA domain;; ABC-transporter extracellular N-terminal;; AAA domain	Putative pleiotropic drug resistance protein 7 OS=Oryza sativa subsp. japonica (Rice) PE=3 SV=1	Q	Secondary metabolites biosynthesis, transport and catabolism	hypothetical protein AMTR_s00122p00085720 [Amborella trichopoda]
Gb_25555	2.05614	252	1.81463	297	1.19552	222	0.599891	151	0.548715	74	0.540285	67	0.000730671	1.548	up	--	--	--	--	--	[R]	General function prediction only	PPR repeat;; PPR repeat family;; PPR repeat;; Pentatricopeptide repeat domain;; DYW family of nucleic acid deaminases	Pentatricopeptide repeat-containing protein At2g22070 GN=PCMP-H41 OS=Arabidopsis thaliana (Mouse-ear cress) PE=3 SV=1	R	General function prediction only	predicted protein [Physcomitrella patens]
Gb_40047	0.987035	129	1.08856	190	0.872995	173	0.162657	44	0.313242	45	0.512308	68	0.000217973	1.5461	up	--	--	--	--	--	[R]	General function prediction only	PPR repeat family;; PPR repeat;; Pentatricopeptide repeat domain;; PPR repeat;; DYW family of nucleic acid deaminases;; Tetratricopeptide repeat	Pentatricopeptide repeat-containing protein At1g11290 GN=T28P6.20 OS=Arabidopsis thaliana (Mouse-ear cress) PE=2 SV=1	R	General function prediction only	unknown [Picea sitchensis]
Gb_14342	17.2288	2286	12.5082	2218	12.4231	2492	4.98747	1355	4.89731	710	4.27011	570	1.48814e-05	1.54348	up	[V]	Defense mechanisms	Molecular Function: nucleotide binding (GO:0000166);; Molecular Function: nucleoside-triphosphatase activity (GO:0017111);;	--	--	[Q]	Secondary metabolites biosynthesis, transport and catabolism	ABC-2 type transporter;; ABC transporter;; AAA domain	ABC transporter G family member 5 GN=T10F5.15 OS=Arabidopsis thaliana (Mouse-ear cress) PE=2 SV=1	Q	Secondary metabolites biosynthesis, transport and catabolism	PREDICTED: ABC transporter G family member 5-like [Fragaria vesca subsp. vesca]
Gb_31479	1.24944	163	1.51103	263	1.62611	319	0.441305	117	0.52968	75	0.506752	66	9.8916e-05	1.53962	up	--	--	--	--	--	--	--	KIP1-like protein	--	R	General function prediction only	PREDICTED: uncharacterized protein LOC100256347 isoform X2 [Vitis vinifera]
Gb_28014	1.23275	275	1.95438	499	1.54917	476	0.48585	206	0.494905	115	0.480737	118	5.00413e-06	1.53926	up	[RTKL]	General function prediction only;; Signal transduction mechanisms;; Transcription;; Replication, recombination and repair	--	--	--	[T]	Signal transduction mechanisms	Ethylene-responsive protein kinase Le-CTR1;; Protein tyrosine kinase;; Protein kinase domain	Serine/threonine-protein kinase EDR1 GN=F22O13.20 OS=Arabidopsis thaliana (Mouse-ear cress) PE=1 SV=1	T	Signal transduction mechanisms	hypothetical protein AMTR_s00091p00075810 [Amborella trichopoda]
Gb_32240	91.6626	7402	84.5793	9130	84.9766	10378	27.8404	4603	30.2859	2672	29.9255	2430	5.74562e-20	1.53678	up	--	--	Cellular Component: plasma membrane (GO:0005886);; Biological Process: carbohydrate transport (GO:0008643);; Cellular Component: integral component of membrane (GO:0016021);;	--	--	[R]	General function prediction only	Sugar efflux transporter for intercellular exchange	Bidirectional sugar transporter SWEET1 GN=SWEET1 OS=Arabidopsis thaliana (Mouse-ear cress) PE=1 SV=1	P	Inorganic ion transport and metabolism	PREDICTED: bidirectional sugar transporter SWEET1-like [Eucalyptus grandis]
Gb_21295	19.782	523	19.9604	712	15.2059	610	6.94877	376	4.28794	134	6.5575	186	7.89589e-07	1.5364	up	--	--	--	--	--	[P]	Inorganic ion transport and metabolism	Heavy-metal-associated domain	Heavy metal-associated isoprenylated plant protein 26 (Precursor) GN=F20M13.140 OS=Arabidopsis thaliana (Mouse-ear cress) PE=1 SV=1	P	Inorganic ion transport and metabolism	PREDICTED: heavy metal-associated isoprenylated plant protein 26 [Nelumbo nucifera]
Gb_23628	3.60683	386	3.49107	501	2.96388	486	0.952583	215	1.20898	146	1.14473	128	2.83568e-06	1.53552	up	[KAD]	Transcription;; RNA processing and modification;; Cell cycle control, cell division, chromosome partitioning	Molecular Function: DNA binding (GO:0003677);; Molecular Function: chromatin binding (GO:0003682);;	K09422|1.56647e-75|vvi:100232973|K09422 myb proto-oncogene protein, plant | (RefSeq) MYB5b	--	[K]	Transcription	Myb-like DNA-binding domain;; Myb-like DNA-binding domain	Transcription repressor MYB5 GN=MYB5 OS=Arabidopsis thaliana (Mouse-ear cress) PE=1 SV=1	K	Transcription	unknown [Picea sitchensis]
Gb_36365	1.49856	275	1.47273	360	1.35117	386	0.36581	141	0.45687	90	0.649305	121	1.3318e-05	1.53145	up	--	--	--	--	--	[R]	General function prediction only	PPR repeat family;; PPR repeat;; PPR repeat;; Pentatricopeptide repeat domain;; DYW family of nucleic acid deaminases	Putative pentatricopeptide repeat-containing protein At3g23330 GN=PCMP-H32 OS=Arabidopsis thaliana (Mouse-ear cress) PE=3 SV=1	R	General function prediction only	unknown [Picea sitchensis]
Gb_33722	7.05721	1099	5.49268	1143	5.89635	1388	2.08362	664	2.21627	377	1.94367	305	1.7345e-10	1.5305	up	[Q]	Secondary metabolites biosynthesis, transport and catabolism	--	K09840|1.7002e-176|smo:SELMODRAFT_75383|K09840 9-cis-epoxycarotenoid dioxygenase [EC:1.13.11.51] | (RefSeq) hypothetical protein	Carotenoid biosynthesis (ko00906)	[Q]	Secondary metabolites biosynthesis, transport and catabolism	Retinal pigment epithelial membrane protein	9-cis-epoxycarotenoid dioxygenase NCED9, chloroplastic (Precursor) GN=NCED9 OS=Arabidopsis thaliana (Mouse-ear cress) PE=2 SV=1	Q	Secondary metabolites biosynthesis, transport and catabolism	putative 9-cis-epoxycarotenoid dioxygenase [Cryptomeria japonica]
NG_15804	1.18157	51	1.106	64	1.62563	107	0.532067	47	0.190641	9	0.589948	26	0.00880004	1.52962	up	--	--	--	--	--	--	--	--	--	--	--	--
Gb_38604	37.3444	3282	31.0823	3652	28.1848	3746	12.1832	2192	10.8521	1042	9.68612	856	4.99292e-08	1.52855	up	[O]	Posttranslational modification, protein turnover, chaperones	Molecular Function: peroxidase activity (GO:0004601);; Cellular Component: plant-type cell wall (GO:0009505);; Cellular Component: chloroplast stroma (GO:0009570);; Cellular Component: thylakoid (GO:0009579);; Cellular Component: chloroplast envelope (GO:0009941);; Biological Process: defense response to bacterium (GO:0042742);; Molecular Function: peroxiredoxin activity (GO:0051920);; Biological…	--	--	[O]	Posttranslational modification, protein turnover, chaperones	Redoxin;; AhpC/TSA family	Peroxiredoxin-2E, chloroplastic (Precursor) GN=PRXIIE OS=Arabidopsis thaliana (Mouse-ear cress) PE=1 SV=2	O	Posttranslational modification, protein turnover, chaperones	unknown [Picea sitchensis]
Gb_27969	6.87232	433	6.71849	574	6.86923	661	1.98894	262	3.06127	211	1.88996	120	5.35491e-07	1.52831	up	[L]	Replication, recombination and repair	Molecular Function: binding (GO:0005488);;	--	--	[L]	Replication, recombination and repair	Exonuclease	--	L	Replication, recombination and repair	PREDICTED: RNA exonuclease 4-like isoform X1 [Nelumbo nucifera]
Gb_22565	129.777	7099	143.531	10495	94.7923	7842	43.5571	4878	42.6286	2548	38.6398	2126	3.61414e-06	1.52699	up	--	--	--	--	--	--	--	Agglutinin	--	S	Function unknown	PREDICTED: uncharacterized protein LOC100263724 [Vitis vinifera]
Gb_01265	1.49964	112	0.966556	96	1.23853	139	0.30202	46	0.581528	48	0.369227	28	0.00200978	1.52521	up	--	--	--	--	--	--	--	DUF761-associated sequence motif	--	S	Function unknown	hypothetical protein glysoja_038146 [Glycine soja]
Gb_01872	168.65	13260	204.055	21447	199.205	23686	64.7778	10426	71.2113	6117	57.6316	4556	2.62081e-21	1.52435	up	--	--	--	--	--	--	--	--	--	--	--	--
Gb_40689	2.50293	181	1.51462	147	1.32913	145	0.607187	90	0.659973	52	0.556338	41	0.0170322	1.52379	up	--	--	--	--	--	--	--	--	--	--	--	unknown [Picea sitchensis]
Gb_24063	1.08532	159	1.30133	255	1.14291	254	0.388937	117	0.457103	74	0.344305	51	0.000294916	1.52354	up	[E]	Amino acid transport and metabolism	Biological Process: transport (GO:0006810);;	K14638|0|pvu:PHAVU_003G192800g|K14638 solute carrier family 15 (peptide/histidine transporter), member 3/4 | (RefSeq) hypothetical protein	--	[E]	Amino acid transport and metabolism	POT family	Protein NRT1/ PTR FAMILY 4.6 GN=At1g69850 OS=Arabidopsis thaliana (Mouse-ear cress) PE=1 SV=1	P	Inorganic ion transport and metabolism	hypothetical protein PHAVU_003G192800g [Phaseolus vulgaris]
Gb_32326	53.8281	9353	50.2774	11678	49.3714	12974	18.9916	6756	16.476	3128	16.7	2918	4.69472e-19	1.52105	up	[LKJ]	Replication, recombination and repair;; Transcription;; Translation, ribosomal structure and biogenesis	Molecular Function: nucleic acid binding (GO:0003676);; Molecular Function: ATP binding (GO:0005524);; Molecular Function: ATP-dependent helicase activity (GO:0008026);;	--	--	[A]	RNA processing and modification	DEAD/DEAH box helicase;; Helicase conserved C-terminal domain;; Type III restriction enzyme, res subunit	DEAD-box ATP-dependent RNA helicase 26 GN=RH26 OS=Arabidopsis thaliana (Mouse-ear cress) PE=1 SV=2	L	Replication, recombination and repair	hypothetical protein AMTR_s00107p00082420 [Amborella trichopoda]
Gb_39627	26.3421	2469	19.4516	2437	17.3234	2455	7.11383	1365	7.19731	737	7.26498	685	0.000115261	1.52102	up	--	--	Molecular Function: DNA binding (GO:0003677);; Molecular Function: transcription factor activity, sequence-specific DNA binding (GO:0003700);; Cellular Component: nucleus (GO:0005634);; Biological Process: regulation of transcription, DNA-templated (GO:0006355);; Biological Process: ethylene-activated signaling pathway (GO:0009873);;	--	--	--	--	AP2 domain	Ethylene-responsive transcription factor 12 GN=F3M18.21 OS=Arabidopsis thaliana (Mouse-ear cress) PE=2 SV=1	K	Transcription	hypothetical protein SELMODRAFT_49950, partial [Selaginella moellendorffii]
Gb_03066	87.7773	7073	87.2859	9532	97.3253	12091	33.9905	5677	28.9756	2590	29.6116	2402	4.06054e-19	1.52014	up	[E]	Amino acid transport and metabolism	Molecular Function: glutamate-ammonia ligase activity (GO:0004356);; Biological Process: glutamine biosynthetic process (GO:0006542);;	K01915|0|mus:103977726|K01915 glutamine synthetase [EC:6.3.1.2] | (RefSeq) glutamine synthetase leaf isozyme, chloroplastic-like	Arginine biosynthesis (ko00220);; Alanine, aspartate and glutamate metabolism (ko00250);; Glyoxylate and dicarboxylate metabolism (ko00630);; Nitrogen metabolism (ko00910);; Biosynthesis of amino acids (ko01230)	[E]	Amino acid transport and metabolism	Glutamine synthetase, catalytic domain;; Glutamine synthetase, beta-Grasp domain	Glutamine synthetase, chloroplastic (Precursor) GN=GLN2 OS=Brassica napus (Rape) PE=2 SV=1	E	Amino acid transport and metabolism	PREDICTED: glutamine synthetase leaf isozyme, chloroplastic [Nelumbo nucifera]
Gb_10152	1.09632	148	1.02147	185	0.848151	173	0.323261	90	0.296863	44	0.384965	53	0.00104492	1.51978	up	--	--	--	--	--	[R]	General function prediction only	PPR repeat family;; PPR repeat;; PPR repeat;; Pentatricopeptide repeat domain;; DYW family of nucleic acid deaminases;; Tetratricopeptide repeat	Pentatricopeptide repeat-containing protein At4g33170 GN=PCMP-H53 OS=Arabidopsis thaliana (Mouse-ear cress) PE=3 SV=1	R	General function prediction only	unknown [Picea sitchensis]
Gb_22960	1.27452	87	0.866871	75	1.04026	102	0.425155	58	0.206997	15	0.460578	30	0.00929548	1.5179	up	[R]	General function prediction only	Biological Process: lipid biosynthetic process (GO:0008610);; Molecular Function: cyclopropane-fatty-acyl-phospholipid synthase activity (GO:0008825);; Biological Process: methylation (GO:0032259);;	--	--	--	--	NAD(P)-binding Rossmann-like domain;; Flavin containing amine oxidoreductase;; FAD dependent oxidoreductase;; FAD binding domain;; FAD dependent oxidoreductase;; Thi4 family;; Pyridine nucleotide-disulphide oxidoreductase;; HI0933-like protein;; Pyridine nucleotide-disulphide oxidoreductase;; Glucose inhibited division protein A;; FAD binding domain	--	R	General function prediction only	hypothetical protein AMTR_s00067p00185740 [Amborella trichopoda]
Gb_37848	19.0052	1575	17.0443	1888	14.3909	1803	6.03913	1024	5.87177	532	5.31493	443	1.96819e-09	1.51752	up	[GC]	Carbohydrate transport and metabolism;; Energy production and conversion	Molecular Function: transferase activity (GO:0016740);;	--	--	[GC]	Carbohydrate transport and metabolism;; Energy production and conversion	UDP-glucoronosyl and UDP-glucosyl transferase	Putative UDP-rhamnose:rhamnosyltransferase 1 OS=Fragaria ananassa (Strawberry) PE=2 SV=1	CG	Energy production and conversion;; Carbohydrate transport and metabolism	unknown [Picea sitchensis]
Gb_27947	11.5255	960	12.4677	1410	11.0189	1390	3.60234	624	4.59128	441	3.44613	296	2.45085e-11	1.51571	up	--	--	--	--	--	--	--	--	--	--	--	unknown [Picea sitchensis]
Gb_11663	0.775247	105	1.04581	189	0.843781	172	0.25607	71	0.444968	66	0.199859	28	0.000906959	1.5157	up	--	--	--	--	--	[R]	General function prediction only	PPR repeat;; PPR repeat family;; PPR repeat;; Pentatricopeptide repeat domain;; DYW family of nucleic acid deaminases;; Tetratricopeptide repeat	Pentatricopeptide repeat-containing protein At2g22070 GN=PCMP-H41 OS=Arabidopsis thaliana (Mouse-ear cress) PE=3 SV=1	R	General function prediction only	PREDICTED: pentatricopeptide repeat-containing protein At1g20230 [Nelumbo nucifera]
Gb_15846	21.4002	1857	18.7637	2222	19.7517	2542	6.93332	1248	7.49339	721	5.96248	511	2.5885e-14	1.51428	up	--	--	--	--	--	--	--	bZIP transcription factor	Uncharacterized protein At4g06598 GN=At4g06598 OS=Arabidopsis thaliana (Mouse-ear cress) PE=2 SV=2	K	Transcription	hypothetical protein AMTR_s00001p00261720 [Amborella trichopoda]
Gb_38954	0.478378	48	0.499563	68	0.719497	110	0.198671	41	0.282807	31	0.089607	10	0.00747558	1.51273	up	--	--	--	--	--	[R]	General function prediction only	MatE	MATE efflux family protein ALF5 GN=MDB19.4 OS=Arabidopsis thaliana (Mouse-ear cress) PE=2 SV=1	V	Defense mechanisms	hypothetical protein AMTR_s00032p00229640 [Amborella trichopoda]
Gb_08108	17.6294	931	16.4087	1151	16.6156	1321	5.59681	603	6.84888	392	4.96244	261	2.37507e-10	1.51246	up	[O]	Posttranslational modification, protein turnover, chaperones	--	K13993|9.43238e-65|cmo:103502478|K13993 HSP20 family protein | (RefSeq) 17.8 kDa class I heat shock protein-like	Protein processing in endoplasmic reticulum (ko04141)	[O]	Posttranslational modification, protein turnover, chaperones	Hsp20/alpha crystallin family	18.2 kDa class I heat shock protein GN=HSP18.2 OS=Medicago sativa (Alfalfa) PE=2 SV=1	O	Posttranslational modification, protein turnover, chaperones	PREDICTED: 18.1 kDa class I heat shock protein-like [Populus euphratica]
Gb_25556	4.76825	273	5.36048	410	5.85637	505	1.72942	203	1.69295	106	2.02425	117	1.06723e-05	1.51143	up	--	--	Biological Process: anatomical structure morphogenesis (GO:0009653);; Biological Process: cellular component organization (GO:0016043);; Biological Process: cell growth (GO:0016049);; Biological Process: single-organism developmental process (GO:0044767);; Biological Process: cellular developmental process (GO:0048869);;	K17261|8.56506e-33|ppp:PHYPADRAFT_167898|K17261 adenylyl cyclase-associated protein | (RefSeq) hypothetical protein	--	[ZT]	Cytoskeleton;; Signal transduction mechanisms	Adenylate cyclase associated (CAP) N terminal	Cyclase-associated protein 1 GN=CAP1 OS=Arabidopsis thaliana (Mouse-ear cress) PE=2 SV=1	TZ	Signal transduction mechanisms;; Cytoskeleton	predicted protein [Physcomitrella patens]
Gb_27324	4.71316	481	3.34028	456	2.23438	345	1.12569	235	1.02625	115	1.40357	144	0.0182731	1.51036	up	[E]	Amino acid transport and metabolism	Biological Process: amino acid transmembrane transport (GO:0003333);; Molecular Function: L-glutamate transmembrane transporter activity (GO:0005313);; Cellular Component: cytoplasm (GO:0005737);; Cellular Component: plasma membrane (GO:0005886);; Biological Process: protein targeting to membrane (GO:0006612);; Biological Process: nucleotide transport (GO:0006862);; Biological Process: ER to Golg…	K03294|0|pda:103703712|K03294 basic amino acid/polyamine antiporter, APA family | (RefSeq) cationic amino acid transporter 1-like	--	[E]	Amino acid transport and metabolism	Amino acid permease;; Amino acid permease;; C-terminus of AA_permease;; Spore germination protein	Cationic amino acid transporter 1 GN=F7J7.60 OS=Arabidopsis thaliana (Mouse-ear cress) PE=1 SV=1	E	Amino acid transport and metabolism	PREDICTED: cationic amino acid transporter 1-like, partial [Phoenix dactylifera]
Gb_24821	3.17434	305	2.53924	326	2.90362	422	0.808353	159	0.949941	100	1.20624	117	1.95586e-05	1.50875	up	--	--	--	--	--	[R]	General function prediction only	PPR repeat family;; PPR repeat;; PPR repeat;; Pentatricopeptide repeat domain;; Tetratricopeptide repeat;; Tetratricopeptide repeat	Pentatricopeptide repeat-containing protein At2g13600 GN=PCMP-E76 OS=Arabidopsis thaliana (Mouse-ear cress) PE=3 SV=1	R	General function prediction only	unknown [Picea sitchensis]
Gb_28393	1.53818	255	0.86963	193	0.961317	241	0.377602	128	0.308765	56	0.479952	80	0.00890638	1.50758	up	--	--	--	--	--	[R]	General function prediction only	PPR repeat family;; PPR repeat;; PPR repeat;; Pentatricopeptide repeat domain;; DYW family of nucleic acid deaminases;; Tetratricopeptide repeat	Pentatricopeptide repeat-containing protein At1g11290 GN=T28P6.20 OS=Arabidopsis thaliana (Mouse-ear cress) PE=2 SV=1	R	General function prediction only	unknown [Picea sitchensis]
Gb_17450	0.699612	92	0.519322	91	0.604141	120	0.184153	50	0.198252	29	0.241149	32	0.00416125	1.50425	up	--	--	--	--	--	--	--	CCT motif	--	S	Function unknown	unknown [Picea sitchensis]
Gb_19395	108.026	9960	82.9868	10228	81.4118	11352	30.503	5758	33.4172	3366	30.238	2804	2.69646e-07	1.5035	up	--	--	--	--	--	--	--	GDSL/SGNH-like Acyl-Esterase family found in Pmr5 and Cas1p;; PMR5 N terminal Domain	Protein trichome birefringence-like 36 GN=TBL36 OS=Arabidopsis thaliana (Mouse-ear cress) PE=2 SV=1	R	General function prediction only	unknown [Picea sitchensis]
Gb_38750	2.0295	267	1.82223	321	1.18906	237	0.431318	117	0.621425	90	0.688818	92	0.00046882	1.50232	up	--	--	--	--	--	[R]	General function prediction only	PPR repeat family;; PPR repeat;; PPR repeat;; Pentatricopeptide repeat domain;; DYW family of nucleic acid deaminases	Pentatricopeptide repeat-containing protein At2g22070 GN=PCMP-H41 OS=Arabidopsis thaliana (Mouse-ear cress) PE=3 SV=1	R	General function prediction only	PREDICTED: pentatricopeptide repeat-containing protein At4g37170 isoform X1 [Nelumbo nucifera]
Gb_20312	21.2751	423	15.1087	401	15.8174	475	5.44439	222	6.33945	138	6.30628	126	1.06747e-05	1.4998	up	--	--	Cellular Component: nucleus (GO:0005634);; Cellular Component: plastid (GO:0009536);;	--	--	--	--	--	--	S	Function unknown	unknown [Picea sitchensis]
Gb_04939	12.9786	305	13.0917	411	10.7706	383	4.72029	227	3.82148	98	4.17629	99	5.80756e-05	1.49839	up	--	--	--	--	--	--	--	--	--	--	--	--
Gb_21965	1.67084	225	1.20013	216	1.58277	322	0.239062	66	0.543131	80	0.770664	105	3.54836e-05	1.4971	up	--	--	--	--	--	[R]	General function prediction only	PPR repeat;; PPR repeat family;; PPR repeat;; Pentatricopeptide repeat domain;; DYW family of nucleic acid deaminases	Pentatricopeptide repeat-containing protein At1g11290 GN=T28P6.20 OS=Arabidopsis thaliana (Mouse-ear cress) PE=2 SV=1	R	General function prediction only	unknown [Picea sitchensis]
Gb_41698	26.0089	1944	24.5289	2450	24.6279	2783	8.04537	1231	9.27277	757	8.81246	662	3.95574e-15	1.49262	up	[R]	General function prediction only	--	--	--	--	--	Tetratricopeptide repeat;; TPR repeat;; Tetratricopeptide repeat;; Tetratricopeptide repeat;; Tetratricopeptide repeat;; Tetratricopeptide repeat;; Tetratricopeptide repeat;; Tetratricopeptide repeat	protein SLOW GREEN 1, chloroplastic {ECO:0000303|PubMed:24420572} (Precursor) OS=Arabidopsis thaliana (Mouse-ear cress) PE=1 SV=1	S	Function unknown	unknown [Picea sitchensis]
Gb_37352	4.59306	663	3.61881	697	3.15353	702	1.20163	343	1.53417	243	1.33102	187	5.1103e-06	1.49141	up	--	--	Cellular Component: integral component of membrane (GO:0016021);;	--	--	--	--	--	--	S	Function unknown	hypothetical protein F383_22307 [Gossypium arboreum]
Gb_03888	2.6634	146	2.44253	179	1.68007	139	0.795195	89	0.846094	52	0.688047	39	0.00225774	1.48857	up	--	--	--	--	--	--	--	--	--	R	General function prediction only	hypothetical protein AMTR_s00269p00010030 [Amborella trichopoda]
Gb_15761	8.8579	1012	11.8212	1425	8.8822	1484	3.91487	695	3.45309	427	3.03893	337	3.9609e-11	1.48795	up	--	--	--	--	--	--	--	Protein of unknown function (DUF642)	--	S	Function unknown	PREDICTED: uncharacterized protein LOC102617237 isoform X1 [Citrus sinensis]
Gb_17148	1.32936	152	1.09518	167	0.995065	172	0.461064	108	0.308572	39	0.410542	48	0.00246368	1.48675	up	[GEPR]	Carbohydrate transport and metabolism;; Amino acid transport and metabolism;; Inorganic ion transport and metabolism;; General function prediction only	Biological Process: response to stimulus (GO:0050896);;	--	--	--	--	BT1 family	Probable folate-biopterin transporter 7 GN=At1g64890 OS=Arabidopsis thaliana (Mouse-ear cress) PE=2 SV=1	R	General function prediction only	predicted protein [Physcomitrella patens]
Gb_03613	1.33396	167	1.20331	201	1.23969	234	0.59548	153	0.42943	59	0.278387	35	0.00192893	1.48556	up	--	--	--	--	--	--	--	Domain of unknown function (DUF4220);; Protein of unknown function, DUF594	--	S	Function unknown	PREDICTED: uncharacterized protein LOC100258913 [Vitis vinifera]
Gb_03607	1.95568	384	2.37817	640	1.95897	595	0.83169	338	0.858331	189	0.49103	100	4.91674e-06	1.48085	up	[R]	General function prediction only	--	--	--	[Z]	Cytoskeleton	Tetratricopeptide repeat;; Tetratricopeptide repeat;; TPR repeat;; Tetratricopeptide repeat;; Tetratricopeptide repeat;; Tetratricopeptide repeat;; Tetratricopeptide repeat;; Tetratricopeptide repeat;; Anaphase-promoting complex, cyclosome, subunit 3;; Domain of Unknown Function (DUF3856);; Tetratricopeptide repeat;; Tetratricopeptide repeat	--	Z	Cytoskeleton	unknown [Picea sitchensis]
Gb_31096	8.88475	744	11.0693	1240	10.9827	1393	3.0464	523	4.25311	389	3.54849	299	1.02876e-10	1.47761	up	--	--	--	--	--	--	--	--	--	--	--	--
Gb_37823	2.30321	186	2.72114	293	2.08238	254	0.931987	154	0.864269	76	0.688069	56	0.000510071	1.47735	up	--	--	--	--	--	--	--	Leucine Rich repeats (2 copies);; Leucine rich repeat;; Leucine Rich Repeat;; Leucine Rich repeat;; Leucine rich repeat N-terminal domain;; Leucine rich repeat	Probable leucine-rich repeat receptor-like protein kinase At1g35710 (Precursor) GN=At1g35710 OS=Arabidopsis thaliana (Mouse-ear cress) PE=2 SV=1	R	General function prediction only	Leucine-rich repeat receptor-like protein kinase family protein [Theobroma cacao]
Gb_29878	1.6182	176	1.73216	251	1.70877	281	0.426938	95	0.736688	88	0.608282	67	0.000155693	1.4766	up	--	--	--	--	--	[R]	General function prediction only	PPR repeat family;; PPR repeat;; Pentatricopeptide repeat domain;; PPR repeat;; Tetratricopeptide repeat;; Tetratricopeptide repeat	Pentatricopeptide repeat-containing protein At3g12770 GN=PCMP-H43 OS=Arabidopsis thaliana (Mouse-ear cress) PE=2 SV=1	R	General function prediction only	unknown [Picea sitchensis]
Gb_34878	30.5888	750	36.0362	1181	32.2283	1195	13.4258	674	10.0446	269	11.0652	273	5.63038e-09	1.47653	up	--	--	Cellular Component: mitochondrion (GO:0005739);; Biological Process: glucose catabolic process (GO:0006007);;	--	--	--	--	B-cell receptor-associated protein 31-like	--	S	Function unknown	PREDICTED: uncharacterized protein LOC104605674 [Nelumbo nucifera]
Gb_39465	1.44008	209	0.986012	191	1.0009	219	0.402112	120	0.36854	59	0.427565	63	0.000941598	1.47522	up	--	--	Biological Process: DNA metabolic process (GO:0006259);; Biological Process: meiosis I (GO:0007127);;	--	--	[R]	General function prediction only	PPR repeat family;; PPR repeat;; PPR repeat;; Pentatricopeptide repeat domain;; Tetratricopeptide repeat	Pentatricopeptide repeat-containing protein At1g11290 GN=T28P6.20 OS=Arabidopsis thaliana (Mouse-ear cress) PE=2 SV=1	R	General function prediction only	unknown [Picea sitchensis]
Gb_18424	2.04141	165	2.83341	306	1.86105	228	1.01444	168	0.593554	53	0.719358	60	0.00090804	1.47487	up	--	--	Molecular Function: hydrolase activity, hydrolyzing O-glycosyl compounds (GO:0004553);; Biological Process: carbohydrate metabolic process (GO:0005975);;	--	--	--	--	Glycosyl hydrolases family 17	Glucan endo-1,3-beta-glucosidase 11 (Precursor) GN=At1g32860 OS=Arabidopsis thaliana (Mouse-ear cress) PE=1 SV=1	R	General function prediction only	unknown [Picea sitchensis]
Gb_04271	10.7426	763	8.80444	835	10.414	1117	3.19685	465	3.56425	277	3.86387	270	7.22556e-09	1.47407	up	[P]	Inorganic ion transport and metabolism	Biological Process: cation transport (GO:0006812);; Molecular Function: cation transmembrane transporter activity (GO:0008324);; Molecular Function: efflux transmembrane transporter activity (GO:0015562);; Cellular Component: integral component of membrane (GO:0016021);; Biological Process: transmembrane transport (GO:0055085);;	--	--	[P]	Inorganic ion transport and metabolism	Cation efflux family	Metal tolerance protein 4 OS=Oryza sativa subsp. japonica (Rice) PE=2 SV=1	P	Inorganic ion transport and metabolism	hypothetical protein AMTR_s00024p00174810 [Amborella trichopoda]
Gb_25810	0.691572	106	1.44799	302	1.13539	267	0.28019	90	0.503061	86	0.352864	56	0.00222378	1.47381	up	[V]	Defense mechanisms	Molecular Function: ATP binding (GO:0005524);; Biological Process: obsolete ATP catabolic process (GO:0006200);; Cellular Component: integral component of membrane (GO:0016021);; Molecular Function: 2-alkenal reductase [NAD(P)] activity (GO:0032440);; Molecular Function: ATPase activity, coupled to transmembrane movement of substances (GO:0042626);; Biological Process: transmembrane transport (GO…	K05666|1.0642e-95|cit:102620957|K05666 ATP-binding cassette, subfamily C (CFTR/MRP), member 2 | (RefSeq) ABC transporter C family member 10-like	--	[Q]	Secondary metabolites biosynthesis, transport and catabolism	ABC transporter transmembrane region	ABC transporter C family member 10 GN=F17J16.190 OS=Arabidopsis thaliana (Mouse-ear cress) PE=2 SV=2	Q	Secondary metabolites biosynthesis, transport and catabolism	PREDICTED: ABC transporter C family member 10-like [Citrus sinensis]
Gb_23047	128.933	6586	90.3558	6169	83.0313	6414	31.5075	3295	40.2958	2249	35.2854	1812	0.000481231	1.47304	up	--	--	Cellular Component: origin recognition complex (GO:0000808);; Biological Process: DNA replication (GO:0006260);;	K02608|4.96204e-125|pda:103716793|K02608 origin recognition complex subunit 6 | (RefSeq) origin of replication complex subunit 6	--	[L]	Replication, recombination and repair	Origin recognition complex subunit 6 (ORC6)	Origin of replication complex subunit 6 {ECO:0000305} OS=Oryza sativa subsp. indica (Rice) PE=3 SV=1	L	Replication, recombination and repair	PREDICTED: origin recognition complex subunit 6 [Nelumbo nucifera]
Gb_23423	5.06396	799	5.72765	1300	6.06091	1682	1.93338	653	2.26663	397	2.17742	333	4.25357e-11	1.46997	up	--	--	--	--	--	--	--	Myb-like DNA-binding domain	Transcription factor PCL1 OS=Oryza sativa subsp. japonica (Rice) PE=2 SV=1	K	Transcription	PREDICTED: probable transcription factor GLK2 [Nelumbo nucifera]
Gb_24929	2.11351	230	1.73387	252	1.82067	300	0.787497	176	0.651288	78	0.540695	60	0.000557583	1.46996	up	--	--	--	--	--	[R]	General function prediction only	PPR repeat;; PPR repeat family;; PPR repeat;; Pentatricopeptide repeat domain;; Tetratricopeptide repeat;; Tetratricopeptide repeat;; Tetratricopeptide repeat;; Vacuolar sorting protein 39 domain 1;; Bacterial transcriptional activator domain;; Tetratricopeptide repeat	Pentatricopeptide repeat-containing protein At4g02750 GN=PCMP-H24 OS=Arabidopsis thaliana (Mouse-ear cress) PE=3 SV=1	R	General function prediction only	unknown [Picea sitchensis]
Gb_26926	161.7	16266	158.305	21288	154.829	23554	54.0043	11121	58.7856	6461	54.7684	5540	1.32739e-19	1.46942	up	[J]	Translation, ribosomal structure and biogenesis	--	K14565|0|vvi:100248675|K14565 nucleolar protein 58 | (RefSeq) probable nucleolar protein 5-2	Ribosome biogenesis in eukaryotes (ko03008)	[AJ]	RNA processing and modification;; Translation, ribosomal structure and biogenesis	Putative snoRNA binding domain;; NOSIC (NUC001) domain;; NOP5NT (NUC127) domain	Probable nucleolar protein 5-2 GN=T12H1.2 OS=Arabidopsis thaliana (Mouse-ear cress) PE=2 SV=1	AJ	RNA processing and modification;; Translation, ribosomal structure and biogenesis	PREDICTED: probable nucleolar protein 5-2 [Vitis vinifera]
Gb_40873	171.976	18409	171.137	24526	167.227	26997	61.3628	13435	68.4705	7990	50.352	5401	3.91943e-19	1.46885	up	--	--	--	K11276|4.71618e-06|gmx:100792094|K11276 nucleophosmin 1 | (RefSeq) histone deacetylase HDT1-like	--	--	--	--	Histone deacetylase HDT1 GN=HDT1 OS=Glycine max (Soybean) PE=2 SV=1	--	--	unknown [Picea sitchensis]
Gb_02780	26.6116	1194	21.4729	1288	20.3183	1379	7.46803	686	9.01037	442	7.77769	351	2.29935e-08	1.46692	up	--	--	Cellular Component: mitochondrion (GO:0005739);;	--	--	--	--	--	--	S	Function unknown	unknown [Picea sitchensis]
Gb_39449	4.50865	410	4.3039	523	4.37509	601	1.34021	250	1.76676	176	1.55678	143	2.75813e-06	1.46372	up	--	--	--	--	--	--	--	--	--	S	Function unknown	unknown [Picea sitchensis]
Gb_31978	1.57071	126	1.41999	152	1.30358	158	0.556563	92	0.526888	46	0.426846	35	0.00343638	1.46307	up	--	--	Molecular Function: transferase activity (GO:0016740);;	--	--	--	--	Transferase family	Shikimate O-hydroxycinnamoyltransferase GN=K19E20.4 OS=Arabidopsis thaliana (Mouse-ear cress) PE=2 SV=1	S	Function unknown	PREDICTED: omega-hydroxypalmitate O-feruloyl transferase-like [Citrus sinensis]
Gb_25041	2.20343	226	1.72692	237	1.68084	261	0.628637	132	0.644134	73	0.711653	74	0.000430907	1.46274	up	--	--	--	--	--	[R]	General function prediction only	PPR repeat;; PPR repeat family;; PPR repeat;; Pentatricopeptide repeat domain;; Tetratricopeptide repeat;; Tetratricopeptide repeat	Pentatricopeptide repeat-containing protein At2g13600 GN=PCMP-E76 OS=Arabidopsis thaliana (Mouse-ear cress) PE=3 SV=1	R	General function prediction only	unknown [Picea sitchensis]
Gb_40143	13.8837	530	15.0561	666	13.642	777	4.2136	352	5.59973	196	4.01267	197	4.21289e-07	1.46223	up	--	--	--	--	--	--	--	--	--	S	Function unknown	predicted protein [Physcomitrella patens]
Gb_35251	45.742	3309	43.8118	4249	44.0116	4842	14.8559	2179	14.9189	1186	18.2699	1309	1.50029e-16	1.4574	up	--	--	Biological Process: rRNA processing (GO:0006364);; Cellular Component: chloroplast thylakoid membrane (GO:0009535);; Biological Process: plastid organization (GO:0009657);; Biological Process: stomatal complex morphogenesis (GO:0010103);; Biological Process: photosystem II assembly (GO:0010207);; Biological Process: regulation of protein dephosphorylation (GO:0035304);; Biological Process: positi…	--	--	--	--	CAAD domains of cyanobacterial aminoacyl-tRNA synthetase	Protein CURVATURE THYLAKOID 1C, chloroplastic (Precursor) GN=CURT1C OS=Arabidopsis thaliana (Mouse-ear cress) PE=1 SV=1	S	Function unknown	unknown [Picea sitchensis]
Gb_03336	3.7309	706	3.39024	858	3.6416	1042	1.2391	480	1.43531	297	1.15701	220	2.79217e-08	1.45642	up	--	--	--	--	--	[V]	Defense mechanisms	--	--	V	Defense mechanisms	PREDICTED: myosin-10 [Prunus mume]
Gb_06112	2.40003	513	1.71983	465	2.06695	662	0.659887	286	0.769805	180	0.750837	161	2.83568e-06	1.45483	up	[L]	Replication, recombination and repair	--	--	--	[L]	Replication, recombination and repair	DNA polymerase III, delta subunit;; ATPase family associated with various cellular activities (AAA);; DNA polymerase III subunits gamma and tau domain III;; Holliday junction DNA helicase ruvB N-terminus	Protein STICHEL-like 4 GN=At5g45720 OS=Arabidopsis thaliana (Mouse-ear cress) PE=2 SV=1	L	Replication, recombination and repair	hypothetical protein SELMODRAFT_423688 [Selaginella moellendorffii]
Gb_20872	5.23384	760	5.28305	989	4.00135	857	1.67402	472	1.64287	249	1.97374	283	3.02927e-08	1.45312	up	--	--	--	--	--	[K]	Transcription	CCT motif	Protein CHLOROPLAST IMPORT APPARATUS 2 (Precursor) GN=CIA2 OS=Arabidopsis thaliana (Mouse-ear cress) PE=2 SV=1	K	Transcription	hypothetical protein AMTR_s00025p00156240 [Amborella trichopoda]
Gb_11714	42.4503	2965	71.0119	6629	51.6235	5452	16.8293	2406	25.7289	1963	16.2751	1143	9.13093e-05	1.45185	up	--	--	--	--	--	--	--	Starch binding domain;; Carbohydrate-binding module 48 (Isoamylase N-terminal domain)	--	R	General function prediction only	predicted protein [Micromonas sp. RCC299]
Gb_10138	1.70907	75	1.73943	102	2.10387	139	0.466908	42	0.788342	38	0.717179	32	0.00285753	1.45116	up	--	--	--	--	--	--	--	--	--	--	--	--
Gb_07070	33.806	811	31.2201	1001	32.4479	1177	11.24	552	12.4554	327	11.1548	269	5.61901e-09	1.44978	up	--	--	Cellular Component: nucleosome (GO:0000786);; Molecular Function: DNA binding (GO:0003677);; Cellular Component: nucleus (GO:0005634);; Biological Process: nucleosome assembly (GO:0006334);; Molecular Function: protein heterodimerization activity (GO:0046982);;	--	--	[B]	Chromatin structure and dynamics	Core histone H2A/H2B/H3/H4;; Histone-like transcription factor (CBF/NF-Y) and archaeal histone	Histone H2AX OS=Picea abies (Norway spruce) PE=2 SV=1	B	Chromatin structure and dynamics	hypothetical protein F383_04564 [Gossypium arboreum]
Gb_15077	31.3125	1701	25.0345	1901	24.0567	1994	9.15498	1026	9.94813	614	9.49414	534	1.2029e-09	1.44914	up	--	--	--	--	--	--	--	--	--	S	Function unknown	unknown [Picea sitchensis]
Gb_05554	1.12899	164	1.06882	207	1.15205	252	0.407165	121	0.473129	75	0.316567	46	0.000901706	1.44832	up	--	--	--	--	--	[R]	General function prediction only	PPR repeat family;; PPR repeat;; PPR repeat;; Pentatricopeptide repeat domain;; DYW family of nucleic acid deaminases	Pentatricopeptide repeat-containing protein At1g11290 GN=T28P6.20 OS=Arabidopsis thaliana (Mouse-ear cress) PE=2 SV=1	R	General function prediction only	unknown [Picea sitchensis]
Gb_33899	273.166	14847	252.513	18347	236.762	19461	91.2846	10157	95.678	5682	86.3504	4719	2.0173e-18	1.44732	up	[J]	Translation, ribosomal structure and biogenesis	Biological Process: RNA methylation (GO:0001510);; Cellular Component: nucleolus (GO:0005730);; Biological Process: purine nucleotide biosynthetic process (GO:0006164);; Biological Process: rRNA processing (GO:0006364);; Biological Process: tRNA processing (GO:0008033);; Molecular Function: methyltransferase activity (GO:0008168);; Biological Process: pyrimidine ribonucleotide biosynthetic proces…	K14563|1.03406e-162|ppp:PHYPADRAFT_196367|K14563 rRNA 2'-O-methyltransferase fibrillarin [EC:2.1.1.-] | (RefSeq) hypothetical protein	Ribosome biogenesis in eukaryotes (ko03008)	[A]	RNA processing and modification	Fibrillarin;; tRNA methyltransferase complex GCD14 subunit	Mediator of RNA polymerase II transcription subunit 36a GN=L73G19.10 OS=Arabidopsis thaliana (Mouse-ear cress) PE=1 SV=2	A	RNA processing and modification	probable fibrillarin [Picea mariana]
Gb_05777	0.463408	51	0.541444	79	0.680372	114	0.242543	55	0.178794	22	0.1711	19	0.0117438	1.4464	up	[KAD]	Transcription;; RNA processing and modification;; Cell cycle control, cell division, chromosome partitioning	Molecular Function: DNA binding (GO:0003677);; Molecular Function: transcription factor activity, sequence-specific DNA binding (GO:0003700);; Cellular Component: nucleus (GO:0005634);; Biological Process: regulation of transcription, DNA-templated (GO:0006355);; Biological Process: response to abscisic acid (GO:0009737);; Biological Process: glucuronoxylan metabolic process (GO:0010413);; Biolog…	--	--	[K]	Transcription	Myb-like DNA-binding domain;; Myb-like DNA-binding domain	Protein ODORANT1 GN=ODO1 OS=Petunia hybrida (Petunia) PE=2 SV=1	K	Transcription	hypothetical protein AMTR_s00091p00025820 [Amborella trichopoda]
Gb_33439	3.51306	404	3.71517	570	2.8049	487	1.5014	353	1.60805	202	0.467647	54	0.000303435	1.44615	up	--	--	--	--	--	[R]	General function prediction only	PPR repeat;; PPR repeat family;; PPR repeat;; Pentatricopeptide repeat domain;; Tetratricopeptide repeat;; Tetratricopeptide repeat	Pentatricopeptide repeat-containing protein At4g02750 GN=PCMP-H24 OS=Arabidopsis thaliana (Mouse-ear cress) PE=3 SV=1	R	General function prediction only	PREDICTED: pentatricopeptide repeat-containing protein At4g02750 [Nelumbo nucifera]
Gb_41238	36.9203	784	28.9332	821	30.4204	977	16.5894	721	17.6395	409	0.037722	1	0.0190533	1.44406	up	--	--	Biological Process: organ growth (GO:0035265);; Biological Process: regulation of cell proliferation (GO:0042127);; Biological Process: regulation of cell cycle (GO:0051726);;	--	--	[S]	Function unknown	Trm112p-like protein	Multifunctional methyltransferase subunit TRM112-like protein At1g22270 GN=At1g22270 OS=Arabidopsis thaliana (Mouse-ear cress) PE=2 SV=1	S	Function unknown	unknown [Picea sitchensis]
Gb_40886	1.65925	297	1.62729	389	2.37786	657	0.757202	284	0.63469	124	0.628216	113	2.08671e-05	1.4439	up	--	--	--	--	--	--	--	--	--	--	--	--
Gb_33545	0.958275	147	0.702629	144	0.714528	166	0.202322	64	0.252578	43	0.399132	62	0.00141713	1.44199	up	--	--	Biological Process: DNA metabolic process (GO:0006259);; Biological Process: meiosis I (GO:0007127);;	--	--	[R]	General function prediction only	PPR repeat family;; PPR repeat;; PPR repeat;; Pentatricopeptide repeat domain;; DYW family of nucleic acid deaminases;; Tetratricopeptide repeat;; Tetratricopeptide repeat;; Vacuolar sorting protein 39 domain 1	Pentatricopeptide repeat-containing protein At1g11290 GN=T28P6.20 OS=Arabidopsis thaliana (Mouse-ear cress) PE=2 SV=1	S	Function unknown	unknown [Picea sitchensis]
Gb_17830	3.33981	898	4.00629	1438	4.60947	1864	1.25167	688	1.50968	443	1.53945	413	9.50168e-12	1.44015	up	--	--	Molecular Function: DNA binding (GO:0003677);; Cellular Component: nucleus (GO:0005634);; Biological Process: regulation of transcription, DNA-templated (GO:0006355);; Biological Process: response to hormone (GO:0009725);; Molecular Function: protein dimerization activity (GO:0046983);;	--	--	--	--	B3 DNA binding domain	Auxin response factor 3 GN=T1B8.30 OS=Arabidopsis thaliana (Mouse-ear cress) PE=1 SV=2	K	Transcription	ARF-L1 protein [Ginkgo biloba]
Gb_04028	3.79496	606	3.88822	830	4.37106	1056	1.64159	537	1.58061	276	1.09503	176	1.56535e-07	1.43918	up	--	--	--	--	--	[R]	General function prediction only	PPR repeat;; PPR repeat family;; PPR repeat;; Pentatricopeptide repeat domain;; DYW family of nucleic acid deaminases;; Tetratricopeptide repeat;; Tetratricopeptide repeat;; Vacuolar sorting protein 39 domain 1;; Tetratricopeptide repeat	Pentatricopeptide repeat-containing protein At3g57430, chloroplastic (Precursor) GN=PCMP-H81 OS=Arabidopsis thaliana (Mouse-ear cress) PE=2 SV=2	R	General function prediction only	PREDICTED: pentatricopeptide repeat-containing protein At4g21065-like [Nelumbo nucifera]
Gb_16104	0.698171	105	0.667057	120	0.617812	137	0.250648	77	0.273964	45	0.163462	24	0.00632948	1.439	up	--	--	--	K04733|2.36167e-25|cic:CICLE_v10010636mg|K04733 interleukin-1 receptor-associated kinase 4 [EC:2.7.11.1] | (RefSeq) hypothetical protein	--	--	--	Protein tyrosine kinase;; Protein kinase domain	Chitin elicitor receptor kinase 1 (Precursor) GN=MIL23.20 OS=Arabidopsis thaliana (Mouse-ear cress) PE=1 SV=1	T	Signal transduction mechanisms	hypothetical protein JCGZ_07176 [Jatropha curcas]
Gb_29392	45.4067	2782	35.3732	2897	34.8534	3229	12.7948	1605	13.3338	893	15.7697	972	1.25308e-07	1.43669	up	[M]	Cell wall/membrane/envelope biogenesis	Molecular Function: methyltransferase activity (GO:0008168);; Biological Process: lipid biosynthetic process (GO:0008610);; Biological Process: methylation (GO:0032259);;	K13384|0|pper:PRUPE_ppa007806mg|K13384 (S)-coclaurine N-methyltransferase [EC:2.1.1.140] | (RefSeq) hypothetical protein	Isoquinoline alkaloid biosynthesis (ko00950)	--	--	Mycolic acid cyclopropane synthetase;; Methyltransferase domain;; Methyltransferase domain;; Methyltransferase domain;; Methyltransferase domain;; Methyltransferase small domain;; Methyltransferase domain;; Tellurite resistance protein TehB;; Nodulation protein S (NodS);; Putative methyltransferase	(S)-coclaurine N-methyltransferase OS=Thalictrum flavum subsp. glaucum (Yellow meadow rue) PE=1 SV=1	R	General function prediction only	hypothetical protein PRUPE_ppa007806mg [Prunus persica]
Gb_15071	12.4445	607	10.8572	706	9.56346	701	3.6205	362	4.07775	218	4.16848	205	6.76087e-07	1.43399	up	--	--	--	--	--	--	--	Plastocyanin-like domain	Early nodulin-like protein 1 (Precursor) GN=At2g25060 OS=Arabidopsis thaliana (Mouse-ear cress) PE=1 SV=2	R	General function prediction only	PREDICTED: early nodulin-like protein 1 [Nicotiana tomentosiformis]
Gb_36777	75.016	8481	73.9225	11178	72.856	12463	24.6686	5705	28.4588	3522	27.2568	3096	2.729e-18	1.43225	up	--	--	Biological Process: protein peptidyl-prolyl isomerization (GO:0000413);; Molecular Function: peptidyl-prolyl cis-trans isomerase activity (GO:0003755);; Biological Process: protein folding (GO:0006457);;	K14826|9.12053e-48|cit:102621921|K14826 FK506-binding nuclear protein [EC:5.2.1.8] | (RefSeq) peptidyl-prolyl cis-trans isomerase FKBP53	--	[O]	Posttranslational modification, protein turnover, chaperones	FKBP-type peptidyl-prolyl cis-trans isomerase;; Nucleoplasmin	Peptidyl-prolyl cis-trans isomerase FKBP53 GN=FKBP53 OS=Arabidopsis thaliana (Mouse-ear cress) PE=1 SV=1	O	Posttranslational modification, protein turnover, chaperones	hypothetical protein CICLE_v10004843mg [Citrus clementina]
Gb_00265	552.517	46619	498.109	56182	460.16	58717	186.363	32190	190.264	17538	170.84	14494	1.92112e-15	1.4319	up	--	--	Molecular Function: nucleotide binding (GO:0000166);; Biological Process: mRNA splicing, via spliceosome (GO:0000398);; Molecular Function: snRNA binding (GO:0017069);;	--	--	--	--	RNA recognition motif. (a.k.a. RRM, RBD, or RNP domain)	Protein MATERNALLY EXPRESSED GENE 5 GN=MEG5 OS=Zea mays (Maize) PE=2 SV=1	R	General function prediction only	unknown [Picea sitchensis]
NG_8269	2.19075	125	1.79175	137	1.15748	100	0.813304	95	0.547529	35	0.483491	28	0.0169694	1.43172	up	--	--	--	--	--	--	--	--	--	--	--	--
Gb_22345	1.45879	82	2.25625	165	2.60335	209	0.860819	95	0.655466	45	0.692404	36	0.00245584	1.43101	up	[G]	Carbohydrate transport and metabolism	Molecular Function: hydrolase activity, hydrolyzing O-glycosyl compounds (GO:0004553);; Cellular Component: cell wall (GO:0005618);; Biological Process: cellular glucan metabolic process (GO:0006073);; Molecular Function: xyloglucan:xyloglucosyl transferase activity (GO:0016762);; Cellular Component: apoplast (GO:0048046);;	K08235|1.27233e-118|pop:POPTR_0019s14590g|K08235 xyloglucan:xyloglucosyl transferase [EC:2.4.1.207] | (RefSeq) POPTRDRAFT_915608; Xyloglucan endotransglucosylase/hydrolase protein 9 precursor	--	--	--	Glycosyl hydrolases family 16;; Xyloglucan endo-transglycosylase (XET) C-terminus	Xyloglucan endotransglucosylase/hydrolase protein 9 (Precursor) GN=F4C21.14 OS=Arabidopsis thaliana (Mouse-ear cress) PE=2 SV=2	R	General function prediction only	unknown [Picea sitchensis]
Gb_33798	1.90944	100	1.48197	103	1.72349	136	0.664191	71	0.51901	30	0.65447	35	0.00697984	1.428	up	--	--	Molecular Function: transferase activity, transferring acyl groups (GO:0016746);;	K13065|1.98857e-57|smo:SELMODRAFT_450208|K13065 shikimate O-hydroxycinnamoyltransferase [EC:2.3.1.133] | (RefSeq) BAHDd3; BAHD family acyltransferase, clade IV	Phenylpropanoid biosynthesis (ko00940);; Flavonoid biosynthesis (ko00941);; Stilbenoid, diarylheptanoid and gingerol biosynthesis (ko00945)	--	--	Transferase family	Agmatine coumaroyltransferase-2 {ECO:0000303|PubMed:18270436, ECO:0000312|EMBL:BAF97627.1} GN=ACT-2 OS=Hordeum vulgare (Barley) PE=1 SV=1	S	Function unknown	BAHD family acyltransferase, clade IV [Selaginella moellendorffii]
Gb_37429	3.51675	395	3.51889	528	3.07608	522	1.43806	331	1.26393	155	0.952556	108	3.41549e-05	1.42747	up	[O]	Posttranslational modification, protein turnover, chaperones	Molecular Function: ATP binding (GO:0005524);; Biological Process: response to stress (GO:0006950);;	K03283|0|mdm:103434172|K03283 heat shock 70kDa protein 1/8 | (RefSeq) heat shock cognate 70 kDa protein 2	Spliceosome (ko03040);; Protein processing in endoplasmic reticulum (ko04141);; Endocytosis (ko04144)	[O]	Posttranslational modification, protein turnover, chaperones	Hsp70 protein;; Hydantoinase/oxoprolinase;; NAD-specific glutamate dehydrogenase	Heat shock cognate 70 kDa protein 2 GN=HSC-2 OS=Solanum lycopersicum (Tomato) PE=1 SV=1	O	Posttranslational modification, protein turnover, chaperones	PREDICTED: heat shock cognate 70 kDa protein 2 [Malus domestica]
Gb_27526	1.14275	77	1.29878	117	0.818612	83	0.440836	61	0.301456	23	0.420485	29	0.0119128	1.42721	up	--	--	Molecular Function: hydrolase activity (GO:0016787);;	--	--	--	--	Lipase (class 3)	GDSL esterase/lipase At4g10955 GN=At4g10955 OS=Arabidopsis thaliana (Mouse-ear cress) PE=2 SV=1	S	Function unknown	hypothetical protein AMTR_s00014p00078510 [Amborella trichopoda]
Gb_21480	1.94054	103	2.0502	151	1.92658	130	0.923483	82	0.551393	35	0.878366	38	0.00557437	1.42317	up	--	--	--	--	--	--	--	NmrA-like family	Isoflavone reductase-like protein OS=Olea europaea (Common olive) PE=1 SV=1	R	General function prediction only	isoflavone reductase-like protein [Ginkgo biloba]
NG_5531	1.24581	137	1.50487	221	1.36998	228	0.599098	135	0.788333	95	0.096189	11	0.00217323	1.42204	up	--	--	--	--	--	--	--	--	--	--	--	--
Gb_13424	1.35627	212	1.82357	381	1.5153	356	0.6406	200	0.574324	97	0.511143	80	0.000210067	1.42074	up	--	--	Cellular Component: nucleus (GO:0005634);;	--	--	--	--	Protein of unknown function DUF260	LOB domain-containing protein 25 GN=MGF10.6 OS=Arabidopsis thaliana (Mouse-ear cress) PE=2 SV=3	S	Function unknown	predicted protein [Physcomitrella patens]
Gb_12553	1.17525	178	0.963837	195	0.837007	192	0.392443	122	0.404705	67	0.285986	44	0.00236175	1.42067	up	--	--	--	--	--	[R]	General function prediction only	PPR repeat family;; PPR repeat;; Pentatricopeptide repeat domain;; PPR repeat;; DYW family of nucleic acid deaminases;; Tetratricopeptide repeat;; Tetratricopeptide repeat;; Tau and MAP protein, tubulin-binding repeat	Pentatricopeptide repeat-containing protein At5g16860 GN=PCMP-H92 OS=Arabidopsis thaliana (Mouse-ear cress) PE=2 SV=1	R	General function prediction only	unknown [Picea sitchensis]
Gb_35645	3.49559	412	3.96497	625	3.89651	695	1.35136	327	1.45567	188	1.32297	157	2.83545e-06	1.42004	up	--	--	--	--	--	[R]	General function prediction only	PPR repeat family;; PPR repeat;; PPR repeat;; Pentatricopeptide repeat domain;; DYW family of nucleic acid deaminases;; Tetratricopeptide repeat	Pentatricopeptide repeat-containing protein At3g46790, chloroplastic (Precursor) GN=T6H20.180 OS=Arabidopsis thaliana (Mouse-ear cress) PE=2 SV=1	R	General function prediction only	unknown [Picea sitchensis]
Gb_05170	3.74937	248	3.4719	270	2.76976	228	1.19735	137	1.00559	65	1.80269	95	0.00091245	1.41964	up	--	--	--	--	--	--	--	Domain of unknown function (DUF588)	--	--	--	CASP-like protein, putative [Theobroma cacao]
Gb_01833	2.23107	71	3.25107	138	3.07317	148	1.12038	73	1.18809	42	0.762621	25	0.00528416	1.41579	up	--	--	--	--	--	--	--	Dirigent-like protein	Dirigent protein 2 (Precursor) GN=DIR2 OS=Arabidopsis thaliana (Mouse-ear cress) PE=2 SV=1	R	General function prediction only	dirigent-like protein pDIR12 [Picea glauca]
Gb_00897	1.128	95	2.05629	213	1.34506	184	0.539186	99	0.456731	49	0.44707	44	0.00214604	1.41542	up	[E]	Amino acid transport and metabolism	--	K01915|4.92344e-109|mus:103985224|K01915 glutamine synthetase [EC:6.3.1.2] | (RefSeq) glutamine synthetase nodule isozyme-like	Arginine biosynthesis (ko00220);; Alanine, aspartate and glutamate metabolism (ko00250);; Glyoxylate and dicarboxylate metabolism (ko00630);; Nitrogen metabolism (ko00910);; Biosynthesis of amino acids (ko01230)	[E]	Amino acid transport and metabolism	Glutamine synthetase, beta-Grasp domain;; Glutamine synthetase, catalytic domain	Glutamine synthetase nodule isozyme OS=Vigna aconitifolia (Moth bean) PE=2 SV=1	E	Amino acid transport and metabolism	hypothetical protein CISIN_1g018434mg [Citrus sinensis]
Gb_06730	5.16792	820	5.79068	1206	6.52965	1529	2.22937	722	2.11989	349	2.03377	327	1.55139e-09	1.41501	up	--	--	--	--	--	--	--	bHLH-MYC and R2R3-MYB transcription factors N-terminal	Transcription factor EMB1444 GN=EMB1444 OS=Arabidopsis thaliana (Mouse-ear cress) PE=2 SV=1	S	Function unknown	predicted protein [Physcomitrella patens]
Gb_40154	17.0613	1037	20.4513	1661	16.3485	1502	8.10006	1008	6.27149	417	5.24013	321	1.44198e-09	1.41384	up	--	--	Molecular Function: hydrolase activity, acting on glycosyl bonds (GO:0016798);;	--	--	--	--	Glycosyl hydrolases family 17	Glucan endo-1,3-beta-glucosidase 13 (Precursor) GN=At5g56590 OS=Arabidopsis thaliana (Mouse-ear cress) PE=1 SV=1	R	General function prediction only	unknown [Picea sitchensis]
Gb_20068	11.1272	143	8.20173	140	10.2362	198	4.02323	106	3.17097	45	3.50647	46	0.0035823	1.41377	up	--	--	--	--	--	--	--	--	--	--	--	--
Gb_13535	88.9264	10511	74.9249	11838	73.7047	13175	29.9519	7248	28.9571	3740	28.4928	3387	2.12221e-12	1.41019	up	--	--	Biological Process: polysaccharide metabolic process (GO:0005976);; Cellular Component: chloroplast (GO:0009507);; Biological Process: cellular process (GO:0009987);; Biological Process: single-organism process (GO:0044699);;	--	--	--	--	Domain of unknown function (DUF4339)	Protein TIC 56, chloroplastic {ECO:0000303|PubMed:23372012} (Precursor) OS=Arabidopsis thaliana (Mouse-ear cress) PE=1 SV=1	S	Function unknown	unknown [Picea sitchensis]
Gb_21247	1.34054	232	1.20271	280	1.37077	358	0.37721	135	0.65699	126	0.388932	69	0.000152938	1.41006	up	--	--	--	--	--	[R]	General function prediction only	PPR repeat family;; PPR repeat;; PPR repeat;; Pentatricopeptide repeat domain;; Tetratricopeptide repeat	Pentatricopeptide repeat-containing protein At4g02750 GN=PCMP-H24 OS=Arabidopsis thaliana (Mouse-ear cress) PE=3 SV=1	R	General function prediction only	unknown [Picea sitchensis]
Gb_26511	3.03528	117	1.64705	116	2.48418	197	1.06106	114	1.72777	72	0	0	0.0266491	1.40938	up	--	--	--	--	--	--	--	GDSL/SGNH-like Acyl-Esterase family found in Pmr5 and Cas1p	Protein trichome birefringence-like 1 GN=TBL1 OS=Arabidopsis thaliana (Mouse-ear cress) PE=2 SV=1	S	Function unknown	unknown [Picea sitchensis]
Gb_14625	2.83054	111	4.61707	242	4.50443	267	1.06516	86	2.09348	90	1.21413	48	0.000400319	1.40825	up	--	--	--	--	--	--	--	--	--	--	--	--
Gb_17997	0.713656	54	1.16179	116	0.651723	74	0.249295	38	0.345134	29	0.328249	25	0.00838506	1.40821	up	--	--	--	--	--	--	--	--	--	S	Function unknown	hypothetical protein AMTR_s00058p00182990 [Amborella trichopoda]
Gb_05758	3.25396	115	2.28983	108	3.07261	164	1.19761	87	1.07952	42	0.847668	31	0.00677127	1.40816	up	--	--	--	--	--	--	--	Domain of unknown function (DUF4228)	--	S	Function unknown	unknown [Picea sitchensis]
Gb_21208	22.2813	1061	20.6342	1311	20.0342	1433	7.59815	735	7.95663	407	7.76975	373	8.18309e-10	1.40677	up	[R]	General function prediction only	Biological Process: response to aluminum ion (GO:0010044);;	--	--	--	--	Uncharacterised protein family (UPF0014)	Protein ALUMINUM SENSITIVE 3 GN=F3G5.12 OS=Arabidopsis thaliana (Mouse-ear cress) PE=1 SV=1	S	Function unknown	hypothetical protein AMTR_s00023p00173690 [Amborella trichopoda]
Gb_23267	1.92655	264	1.50569	276	1.51945	315	0.633968	178	0.636066	95	0.553474	77	0.000478209	1.40652	up	--	--	--	--	--	[R]	General function prediction only	PPR repeat family;; PPR repeat;; PPR repeat;; Pentatricopeptide repeat domain;; DYW family of nucleic acid deaminases	Putative pentatricopeptide repeat-containing protein At1g68930 GN=PCMP-H22 OS=Arabidopsis thaliana (Mouse-ear cress) PE=3 SV=1	R	General function prediction only	unknown [Picea sitchensis]
Gb_39209	7.44885	930	7.52533	1255	7.13227	1346	3.07203	785	2.21168	302	2.83825	357	6.17569e-09	1.40554	up	--	--	Biological Process: cellular metabolic process (GO:0044237);; Biological Process: primary metabolic process (GO:0044238);; Biological Process: organic substance metabolic process (GO:0071704);;	--	--	[L]	Replication, recombination and repair	CRS1 / YhbY (CRM) domain	Chloroplastic group IIA intron splicing facilitator CRS1, chloroplastic (Precursor) GN=At5g16180 OS=Arabidopsis thaliana (Mouse-ear cress) PE=3 SV=2	L	Replication, recombination and repair	hypothetical protein AMTR_s00079p00107040 [Amborella trichopoda]
Gb_24197	0.395216	80	0.409808	110	0.466935	142	0.116499	48	0.179474	40	0.172855	35	0.00370678	1.40296	up	--	--	Cellular Component: Golgi apparatus (GO:0005794);; Biological Process: glucuronoxylan biosynthetic process (GO:0010417);; Molecular Function: xylosyltransferase activity (GO:0042285);;	K20871|7.08236e-96|fve:101310451|K20871 putative beta-1,4-xylosyltransferase IRX14 [EC:2.4.2.-] | (RefSeq) probable beta-1,4-xylosyltransferase IRX14	--	[O]	Posttranslational modification, protein turnover, chaperones	Glycosyltransferase family 43	Probable beta-1,4-xylosyltransferase IRX14H GN=IRX14H OS=Arabidopsis thaliana (Mouse-ear cress) PE=2 SV=1	O	Posttranslational modification, protein turnover, chaperones	PREDICTED: probable beta-1,4-xylosyltransferase IRX14H isoform X2 [Nelumbo nucifera]
Gb_27184	9.38691	781	6.03979	664	6.72804	841	3.04696	498	2.69558	245	2.53396	213	0.00118431	1.40282	up	--	--	Molecular Function: transferase activity (GO:0016740);;	K15400|5.77553e-109|smo:SELMODRAFT_450165|K15400 omega-hydroxypalmitate O-feruloyl transferase [EC:2.3.1.188] | (RefSeq) BAHDe4-1; BAHD family acyltransferase, clade V	Cutin, suberine and wax biosynthesis (ko00073)	--	--	Transferase family;; Condensation domain	Omega-hydroxypalmitate O-feruloyl transferase GN=MEE6.11 OS=Arabidopsis thaliana (Mouse-ear cress) PE=1 SV=1	S	Function unknown	unknown [Picea sitchensis]
Gb_31856	25.3933	802	27.709	1170	36.8352	1759	8.72061	564	13.0532	451	11.5351	367	5.5421e-09	1.39648	up	[F]	Nucleotide transport and metabolism	Molecular Function: adenine phosphoribosyltransferase activity (GO:0003999);; Cellular Component: cytoplasm (GO:0005737);; Biological Process: adenine salvage (GO:0006168);; Biological Process: nucleoside metabolic process (GO:0009116);;	K00759|3.25495e-104|tcc:TCM_016011|K00759 adenine phosphoribosyltransferase [EC:2.4.2.7] | (RefSeq) Adenine phosphoribosyl transferase 4	Purine metabolism (ko00230)	[F]	Nucleotide transport and metabolism	Phosphoribosyl transferase domain	Adenine phosphoribosyltransferase 3 GN=APT3 OS=Arabidopsis thaliana (Mouse-ear cress) PE=1 SV=1	F	Nucleotide transport and metabolism	unknown [Picea sitchensis]
Gb_01949	7.41721	1139	6.13493	1263	5.03773	1175	2.13133	675	2.58749	437	2.1625	339	1.96138e-05	1.39578	up	--	--	--	--	--	[S]	Function unknown	PQ loop repeat	--	S	Function unknown	hypothetical protein AMTR_s00101p00071870 [Amborella trichopoda]
Gb_11705	9.47709	603	8.31327	707	7.83072	753	3.72095	485	3.111	216	2.662	171	4.24969e-06	1.39397	up	--	--	Molecular Function: protein binding (GO:0005515);; Cellular Component: nucleus (GO:0005634);; Biological Process: response to ethylene (GO:0009723);; Biological Process: response to abscisic acid (GO:0009737);; Biological Process: seed germination (GO:0009845);; Biological Process: salicylic acid mediated signaling pathway (GO:0009863);; Biological Process: jasmonic acid mediated signaling pathwa…	K14495|1.24229e-23|tcc:TCM_034776|K14495 F-box protein GID2 | (RefSeq) F-box family protein	Plant hormone signal transduction (ko04075)	--	--	F-box-like;; F-box domain	F-box protein GID2 GN=T22A6.40 OS=Arabidopsis thaliana (Mouse-ear cress) PE=1 SV=1	R	General function prediction only	unknown [Picea sitchensis]
Gb_26390	28.7198	669	24.2488	756	24.4704	863	8.13806	389	10.7581	274	10.0159	235	2.22424e-07	1.39238	up	[J]	Translation, ribosomal structure and biogenesis	Biological Process: RNA methylation (GO:0001510);; Molecular Function: RNA binding (GO:0003723);; Cellular Component: nucleolus (GO:0005730);; Biological Process: nucleotide biosynthetic process (GO:0009165);; Biological Process: regulation of flower development (GO:0009909);; Biological Process: histone lysine methylation (GO:0034968);;	K11129|2.53644e-59|pda:103702407|K11129 H/ACA ribonucleoprotein complex subunit 2 | (RefSeq) H/ACA ribonucleoprotein complex subunit 2-like protein	Ribosome biogenesis in eukaryotes (ko03008)	[A]	RNA processing and modification	Ribosomal protein L7Ae/L30e/S12e/Gadd45 family	H/ACA ribonucleoprotein complex subunit 2-like protein GN=At5g08180 OS=Arabidopsis thaliana (Mouse-ear cress) PE=1 SV=1	A	RNA processing and modification	unknown [Picea sitchensis]
Gb_03064	10.8251	1149	11.0836	1572	10.6246	1705	4.48891	975	3.76634	437	3.82309	408	4.57746e-10	1.39162	up	[E]	Amino acid transport and metabolism	Molecular Function: glutamate-ammonia ligase activity (GO:0004356);; Biological Process: glutamine biosynthetic process (GO:0006542);;	K01915|0|mus:103977726|K01915 glutamine synthetase [EC:6.3.1.2] | (RefSeq) glutamine synthetase leaf isozyme, chloroplastic-like	Arginine biosynthesis (ko00220);; Alanine, aspartate and glutamate metabolism (ko00250);; Glyoxylate and dicarboxylate metabolism (ko00630);; Nitrogen metabolism (ko00910);; Biosynthesis of amino acids (ko01230)	[E]	Amino acid transport and metabolism	Glutamine synthetase, catalytic domain;; Glutamine synthetase, beta-Grasp domain	Glutamine synthetase, chloroplastic (Precursor) GN=GLN2 OS=Brassica napus (Rape) PE=2 SV=1	E	Amino acid transport and metabolism	PREDICTED: glutamine synthetase leaf isozyme, chloroplastic [Nelumbo nucifera]
Gb_29027	150.122	5328	162.441	7706	87.2031	4680	53.3629	3877	53.1521	2061	42.5957	1520	0.00551553	1.39136	up	[B]	Chromatin structure and dynamics	Cellular Component: nucleosome (GO:0000786);; Molecular Function: DNA binding (GO:0003677);; Cellular Component: nucleus (GO:0005634);; Biological Process: nucleosome assembly (GO:0006334);; Biological Process: cell proliferation (GO:0008283);; Cellular Component: plastid (GO:0009536);; Molecular Function: protein heterodimerization activity (GO:0046982);;	K11253|7.17949e-92|crb:CARUB_v10021660mg|K11253 histone H3 | (RefSeq) hypothetical protein	--	[B]	Chromatin structure and dynamics	Core histone H2A/H2B/H3/H4	Histone H3.2 OS=Triticum aestivum (Wheat) PE=1 SV=2	B	Chromatin structure and dynamics	hypothetical protein CARUB_v10021660mg, partial [Capsella rubella]
Gb_03137	2.37243	314	2.26149	400	2.03861	407	0.887687	240	0.976955	141	0.632142	84	0.000166641	1.38445	up	--	--	--	--	--	[R]	General function prediction only	PPR repeat family;; PPR repeat;; PPR repeat;; Pentatricopeptide repeat domain;; DYW family of nucleic acid deaminases;; Tetratricopeptide repeat;; Tetratricopeptide repeat	Pentatricopeptide repeat-containing protein At2g27610 OS=Arabidopsis thaliana (Mouse-ear cress) PE=2 SV=1	R	General function prediction only	PREDICTED: pentatricopeptide repeat-containing protein At5g04780-like isoform X1 [Nelumbo nucifera]
Gb_38147	6.88049	248	5.74508	277	6.47178	353	2.71595	201	2.24987	89	2.14279	78	0.000608949	1.38375	up	--	--	Biological Process: signal transduction (GO:0007165);; Molecular Function: phosphoric diester hydrolase activity (GO:0008081);;	K05857|2.78724e-26|tcc:TCM_041617|K05857 phosphatidylinositol phospholipase C, delta [EC:3.1.4.11] | (RefSeq) Phosphatidylinositol-speciwc phospholipase C4	Inositol phosphate metabolism (ko00562);; Phosphatidylinositol signaling system (ko04070);; AGE-RAGE signaling pathway in diabetic complications (ko04933)	[T]	Signal transduction mechanisms	Phosphoinositide-specific phospholipase C, efhand-like	Phosphoinositide phospholipase C 5 OS=Arabidopsis thaliana (Mouse-ear cress) PE=2 SV=2	I	Lipid transport and metabolism	unknown [Picea sitchensis]
Gb_00521	6.35201	585	5.49342	676	5.9123	823	2.56655	484	1.98959	200	2.08098	193	3.60111e-06	1.38177	up	--	--	Cellular Component: chloroplast envelope (GO:0009941);; Biological Process: stomatal complex morphogenesis (GO:0010103);; Molecular Function: oxidoreductase activity (GO:0016491);; Biological Process: mRNA modification (GO:0016556);; Biological Process: oxidation-reduction process (GO:0055114);;	--	--	--	--	Flavin containing amine oxidoreductase;; NAD(P)-binding Rossmann-like domain	--	H	Coenzyme transport and metabolism	PREDICTED: phytoene dehydrogenase, chloroplastic/chromoplastic [Nelumbo nucifera]
Gb_29995	0.779917	121	0.633808	131	0.879435	206	0.34363	109	0.239751	41	0.268178	42	0.00521063	1.38155	up	--	--	--	--	--	[R]	General function prediction only	PPR repeat family;; PPR repeat;; PPR repeat;; Pentatricopeptide repeat domain;; DYW family of nucleic acid deaminases	Pentatricopeptide repeat-containing protein At3g03580 GN=PCMP-H23 OS=Arabidopsis thaliana (Mouse-ear cress) PE=2 SV=1	R	General function prediction only	unknown [Picea sitchensis]
Gb_12554	1.30993	198	1.33282	269	1.38306	316	0.417723	130	0.504577	84	0.583239	89	0.000333709	1.37911	up	--	--	--	--	--	[R]	General function prediction only	PPR repeat;; PPR repeat family;; PPR repeat;; Pentatricopeptide repeat domain;; Tetratricopeptide repeat;; Tetratricopeptide repeat;; Tetratricopeptide repeat;; Tetratricopeptide repeat;; Tetratricopeptide repeat;; Tetratricopeptide repeat;; Grap2 and cyclin-D-interacting;; Tetratricopeptide repeat	Pentatricopeptide repeat-containing protein At4g02750 GN=PCMP-H24 OS=Arabidopsis thaliana (Mouse-ear cress) PE=3 SV=1	R	General function prediction only	unknown [Picea sitchensis]
Gb_08631	1.93962	397	1.98822	593	1.97339	640	0.581065	277	0.629314	175	0.747571	181	4.5006e-06	1.37841	up	--	--	Biological Process: phosphate-containing compound metabolic process (GO:0006796);; Biological Process: response to stress (GO:0006950);; Biological Process: response to hormone (GO:0009725);; Biological Process: organophosphate metabolic process (GO:0019637);; Biological Process: primary metabolic process (GO:0044238);; Biological Process: single-organism process (GO:0044699);; Biological Process…	--	--	[U]	Intracellular trafficking, secretion, and vesicular transport	Endonuclease/Exonuclease/phosphatase family	Type I inositol 1,4,5-trisphosphate 5-phosphatase 2 GN=T6K21.190 OS=Arabidopsis thaliana (Mouse-ear cress) PE=1 SV=2	U	Intracellular trafficking, secretion, and vesicular transport	hypothetical protein AMTR_s00149p00041190 [Amborella trichopoda]
Gb_09055	8.36302	429	6.75387	463	5.09748	396	3.2259	339	2.19108	123	2.16129	112	0.00389272	1.37823	up	[QR]	Secondary metabolites biosynthesis, transport and catabolism;; General function prediction only	Molecular Function: transferase activity (GO:0016740);;	--	--	--	--	Nicotianamine synthase protein;; Methyltransferase domain	Nicotianamine synthase GN=CHLN OS=Solanum lycopersicum (Tomato) PE=2 SV=1	H	Coenzyme transport and metabolism	hypothetical protein AMTR_s00058p00051350 [Amborella trichopoda]
Gb_02227	1.17538	191	0.865137	188	0.807593	198	0.427055	142	0.26339	47	0.377609	62	0.00388531	1.3777	up	--	--	--	--	--	--	--	CAP160 repeat	--	--	--	putative low-temperature-induced protein [Cupressus sempervirens]
Gb_36538	1.36001	219	1.33281	287	1.047	255	0.564763	186	0.195059	35	0.637767	104	0.00132571	1.37763	up	--	--	--	--	--	[R]	General function prediction only	PPR repeat family;; PPR repeat;; PPR repeat;; Pentatricopeptide repeat domain;; DYW family of nucleic acid deaminases;; Tetratricopeptide repeat;; Protein of unknown function (DUF3624)	Pentatricopeptide repeat-containing protein At3g57430, chloroplastic (Precursor) GN=PCMP-H81 OS=Arabidopsis thaliana (Mouse-ear cress) PE=2 SV=2	R	General function prediction only	unknown [Picea sitchensis]
Gb_25310	21.3297	2899	19.0389	3461	19.8183	4076	7.23753	2015	8.30004	1231	7.12511	975	4.29501e-14	1.37698	up	[L]	Replication, recombination and repair	Molecular Function: DNA primase activity (GO:0003896);; Biological Process: DNA replication, synthesis of RNA primer (GO:0006269);; Biological Process: DNA replication initiation (GO:0006270);; Biological Process: regulation of DNA replication (GO:0006275);; Biological Process: DNA methylation (GO:0006306);; Biological Process: cell proliferation (GO:0008283);; Cellular Component: plasmodesma (GO…	K02685|3.09981e-47|zma:103648839|K02685 DNA primase large subunit [EC:2.7.7.-] | (RefSeq) probable DNA primase large subunit	Purine metabolism (ko00230);; Pyrimidine metabolism (ko00240);; DNA replication (ko03030)	[L]	Replication, recombination and repair	--	Probable DNA primase large subunit GN=At1g67320 OS=Arabidopsis thaliana (Mouse-ear cress) PE=2 SV=2	L	Replication, recombination and repair	PREDICTED: probable DNA primase large subunit [Zea mays]
Gb_05243	123.337	12514	114.789	15569	107.712	16527	44.3684	9215	43.6797	4842	42.2311	4308	1.65313e-16	1.37533	up	[J]	Translation, ribosomal structure and biogenesis	Cellular Component: cell wall (GO:0005618);; Cellular Component: nucleolus (GO:0005730);;	K14564|0|mus:103984244|K14564 nucleolar protein 56 | (RefSeq) nucleolar protein 56	Ribosome biogenesis in eukaryotes (ko03008)	[AJ]	RNA processing and modification;; Translation, ribosomal structure and biogenesis	Putative snoRNA binding domain;; NOSIC (NUC001) domain;; NOP5NT (NUC127) domain	Probable nucleolar protein 5-2 GN=T12H1.2 OS=Arabidopsis thaliana (Mouse-ear cress) PE=2 SV=1	AJ	RNA processing and modification;; Translation, ribosomal structure and biogenesis	PREDICTED: nucleolar protein 56-like [Populus euphratica]
Gb_37441	1.88615	135	1.33924	128	1.71517	185	0.777081	114	0.543196	43	0.527008	38	0.00765226	1.37172	up	--	--	Molecular Function: S-adenosylmethionine-dependent methyltransferase activity (GO:0008757);; Molecular Function: gibberellin carboxyl-O-methyltransferase activity (GO:0010341);; Biological Process: methylation (GO:0032259);;	K18886|0|pda:103709125|K18886 gibberellin A4 carboxyl methyltransferase [EC:2.1.1.276] | (RefSeq) gibberellic acid methyltransferase 2	--	--	--	SAM dependent carboxyl methyltransferase	Gibberellic acid methyltransferase 2 GN=GAMT2 OS=Arabidopsis thaliana (Mouse-ear cress) PE=1 SV=1	R	General function prediction only	PREDICTED: gibberellic acid methyltransferase 2 isoform X2 [Nelumbo nucifera]
Gb_04950	3.11151	230	2.83136	278	2.50724	277	0.894141	136	1.06707	85	1.24516	92	0.000473377	1.37103	up	--	--	--	--	--	--	--	--	--	--	--	--
Gb_30842	5.35818	221	4.00652	220	3.79143	236	1.62139	137	1.90474	86	1.43566	60	0.00149263	1.37091	up	--	--	Biological Process: response to hexose (GO:0009746);; Cellular Component: integral component of membrane (GO:0016021);;	K08360|4.59487e-86|tcc:TCM_019521|K08360 cytochrome b-561 [EC:1.16.5.1] | (RefSeq) Cytochrome B561-1 isoform 1	--	[C]	Energy production and conversion	Eukaryotic cytochrome b561	Probable transmembrane ascorbate ferrireductase 2 GN=At5g38630 OS=Arabidopsis thaliana (Mouse-ear cress) PE=1 SV=1	C	Energy production and conversion	unknown [Picea sitchensis]
Gb_10087	129.87	19806	131.29	27032	132.766	30842	50.3176	15982	49.6974	8430	46.9364	7309	6.00462e-17	1.37051	up	[LKJ]	Replication, recombination and repair;; Transcription;; Translation, ribosomal structure and biogenesis	Molecular Function: hydrolase activity (GO:0016787);;	--	--	[A]	RNA processing and modification	DEAD/DEAH box helicase;; Helicase conserved C-terminal domain	DEAD-box ATP-dependent RNA helicase 53 GN=RH53 OS=Arabidopsis thaliana (Mouse-ear cress) PE=2 SV=1	A	RNA processing and modification	PREDICTED: DEAD-box ATP-dependent RNA helicase 9-like isoform X2 [Phoenix dactylifera]
Gb_03626	7.20674	1057	6.62351	1299	6.14097	1363	2.65019	796	2.4579	394	2.44115	360	5.89871e-09	1.36999	up	--	--	--	--	--	[R]	General function prediction only	PPR repeat family;; PPR repeat;; PPR repeat;; Pentatricopeptide repeat domain;; DYW family of nucleic acid deaminases;; Tetratricopeptide repeat;; Tetratricopeptide repeat;; Anaphase-promoting complex, cyclosome, subunit 3;; Tetratricopeptide repeat;; Tetratricopeptide repeat;; Bacterial transcriptional activator domain;; Vacuolar sorting protein 39 domain 1;; Tetratricopeptide repeat	Pentatricopeptide repeat-containing protein At3g57430, chloroplastic (Precursor) GN=PCMP-H81 OS=Arabidopsis thaliana (Mouse-ear cress) PE=2 SV=2	S	Function unknown	unknown [Picea sitchensis]
Gb_28202	2.19191	87	3.32314	176	2.50218	150	1.44119	117	0.541156	24	1.00548	40	0.00996478	1.3698	up	--	--	--	K18875|9.36976e-10|vvi:100250236|K18875 enhanced disease susceptibility 1 protein | (RefSeq) protein EDS1	Plant-pathogen interaction (ko04626)	--	--	--	--	R	General function prediction only	unnamed protein product [Vitis vinifera]
Gb_18360	528.59	36634	410.759	38056	392.187	41106	175.889	24955	169.433	12829	159.562	11119	4.35624e-06	1.36834	up	[O]	Posttranslational modification, protein turnover, chaperones	Molecular Function: copper ion binding (GO:0005507);; Molecular Function: ATP binding (GO:0005524);; Cellular Component: mitochondrion (GO:0005739);; Biological Process: protein folding (GO:0006457);; Biological Process: response to cold (GO:0009409);; Cellular Component: chloroplast thylakoid membrane (GO:0009535);; Cellular Component: chloroplast stroma (GO:0009570);; Cellular Component: chloro…	K04078|3.2953e-124|fve:101303840|K04078 chaperonin GroES | (RefSeq) 20 kDa chaperonin, chloroplastic	--	[O]	Posttranslational modification, protein turnover, chaperones	Chaperonin 10 Kd subunit	20 kDa chaperonin, chloroplastic (Precursor) GN=T1M15.120 OS=Arabidopsis thaliana (Mouse-ear cress) PE=1 SV=2	O	Posttranslational modification, protein turnover, chaperones	unknown [Picea sitchensis]
Gb_00693	29.4663	2522	28.0335	3264	25.9496	3540	9.99164	1762	10.948	1042	11.3895	961	8.87037e-14	1.36704	up	[J]	Translation, ribosomal structure and biogenesis	Molecular Function: structural constituent of ribosome (GO:0003735);; Cellular Component: ribosome (GO:0005840);; Biological Process: translation (GO:0006412);; Cellular Component: chloroplast thylakoid (GO:0009534);; Cellular Component: chloroplast stroma (GO:0009570);;	--	--	--	--	Sigma 54 modulation protein / S30EA ribosomal protein	Ribosome-binding factor PSRP1, chloroplastic (Precursor) GN=PSRP1 OS=Spinacia oleracea (Spinach) PE=1 SV=2	J	Translation, ribosomal structure and biogenesis	unknown [Picea sitchensis]
Gb_28171	3.2568	341	3.03503	425	3.80853	603	1.18324	254	1.34352	154	1.28668	136	2.57375e-05	1.36698	up	--	--	--	--	--	[R]	General function prediction only	PPR repeat;; PPR repeat family;; PPR repeat;; Pentatricopeptide repeat domain;; Tetratricopeptide repeat;; Tetratricopeptide repeat;; Vacuolar sorting protein 39 domain 1;; Tetratricopeptide repeat;; Bacterial transcriptional activator domain;; Tetratricopeptide repeat	Pentatricopeptide repeat-containing protein At2g13600 GN=PCMP-E76 OS=Arabidopsis thaliana (Mouse-ear cress) PE=3 SV=1	R	General function prediction only	unknown [Picea sitchensis]
Gb_07729	1.45557	195	1.72966	309	1.80423	365	0.971243	266	0.114223	17	0.781183	105	0.00386574	1.36684	up	--	--	--	--	--	[R]	General function prediction only	PPR repeat family;; PPR repeat;; PPR repeat;; Pentatricopeptide repeat domain;; DYW family of nucleic acid deaminases;; Tetratricopeptide repeat;; Tetratricopeptide repeat;; Tetratricopeptide repeat	Pentatricopeptide repeat-containing protein At1g11290 GN=T28P6.20 OS=Arabidopsis thaliana (Mouse-ear cress) PE=2 SV=1	S	Function unknown	PREDICTED: pentatricopeptide repeat-containing protein At3g16610 [Nelumbo nucifera]
Gb_38242	1.46729	214	1.32404	258	1.42807	315	0.478125	143	0.639472	102	0.485255	71	0.000530383	1.36406	up	--	--	--	--	--	[R]	General function prediction only	PPR repeat;; PPR repeat family;; PPR repeat;; Pentatricopeptide repeat domain;; DYW family of nucleic acid deaminases;; Tetratricopeptide repeat;; Tetratricopeptide repeat;; Mitochondrial ATPase expression;; Tetratricopeptide repeat	Pentatricopeptide repeat-containing protein At4g02750 GN=PCMP-H24 OS=Arabidopsis thaliana (Mouse-ear cress) PE=3 SV=1	R	General function prediction only	PpPPR_98 [Physcomitrella patens]
Gb_03221	2.77363	352	2.5868	438	2.44369	469	0.95767	249	1.0044	139	0.999286	128	7.11884e-05	1.36387	up	--	--	--	--	--	[R]	General function prediction only	PPR repeat;; PPR repeat family;; PPR repeat;; Pentatricopeptide repeat domain;; DYW family of nucleic acid deaminases;; Tetratricopeptide repeat;; Tetratricopeptide repeat;; Tetratricopeptide repeat;; Mitochondrial ATPase expression	Pentatricopeptide repeat-containing protein At4g02750 GN=PCMP-H24 OS=Arabidopsis thaliana (Mouse-ear cress) PE=3 SV=1	R	General function prediction only	unknown [Picea sitchensis]
Gb_18782	1.3158	222	1.70361	384	1.48941	380	0.564175	195	0.617272	114	0.521878	89	0.000216499	1.36281	up	--	--	Cellular Component: cytoplasm (GO:0005737);;	--	--	[R]	General function prediction only	F-box domain;; Kelch motif	F-box/kelch-repeat protein At1g67480 GN=At1g67480 OS=Arabidopsis thaliana (Mouse-ear cress) PE=2 SV=1	R	General function prediction only	unknown [Picea sitchensis]
Gb_18168	94.7553	5616	97.4864	7666	100.745	8840	36.7198	4220	43.021	2740	32.8901	1972	6.7713e-16	1.36231	up	[R]	General function prediction only	Molecular Function: nucleotide binding (GO:0000166);; Molecular Function: nucleic acid binding (GO:0003676);; Biological Process: organelle organization (GO:0006996);; Biological Process: post-embryonic development (GO:0009791);; Molecular Function: ion binding (GO:0043167);; Biological Process: cellular metabolic process (GO:0044237);; Biological Process: primary metabolic process (GO:0044238);;…	--	--	[R]	General function prediction only	RNA recognition motif. (a.k.a. RRM, RBD, or RNP domain);; RNA recognition motif (a.k.a. RRM, RBD, or RNP domain);; RNA recognition motif. (a.k.a. RRM, RBD, or RNP domain)	Glycine-rich RNA-binding protein 3, mitochondrial (Precursor) GN=MAF19_30 OS=Arabidopsis thaliana (Mouse-ear cress) PE=2 SV=1	R	General function prediction only	unknown [Picea sitchensis]
Gb_26398	187.194	5007	172.175	6156	159.671	6458	61.4591	3365	71.8534	2100	64.3255	1730	4.50562e-15	1.36221	up	[J]	Translation, ribosomal structure and biogenesis	Biological Process: RNA methylation (GO:0001510);; Molecular Function: RNA binding (GO:0003723);; Cellular Component: nucleolus (GO:0005730);; Biological Process: nucleotide biosynthetic process (GO:0009165);; Biological Process: regulation of flower development (GO:0009909);; Biological Process: histone lysine methylation (GO:0034968);;	K11129|6.01385e-71|pda:103702407|K11129 H/ACA ribonucleoprotein complex subunit 2 | (RefSeq) H/ACA ribonucleoprotein complex subunit 2-like protein	Ribosome biogenesis in eukaryotes (ko03008)	[A]	RNA processing and modification	Ribosomal protein L7Ae/L30e/S12e/Gadd45 family	H/ACA ribonucleoprotein complex subunit 2-like protein GN=At5g08180 OS=Arabidopsis thaliana (Mouse-ear cress) PE=1 SV=1	A	RNA processing and modification	unknown [Picea sitchensis]
Gb_06795	2.47453	46	5.41814	134	4.59367	129	1.30374	50	0.767889	16	2.58721	49	0.0146663	1.36141	up	--	--	Molecular Function: methyltransferase activity (GO:0008168);; Biological Process: methylation (GO:0032259);;	K12502|2.56e-37|ppp:PHYPADRAFT_33603|K12502 MPBQ/MSBQ methyltransferase [EC:2.1.1.295] | (RefSeq) hypothetical protein	Ubiquinone and other terpenoid-quinone biosynthesis (ko00130)	[H]	Coenzyme transport and metabolism	--	2-methyl-6-phytyl-1,4-hydroquinone methyltransferase, chloroplastic (Precursor) OS=Spinacia oleracea (Spinach) PE=1 SV=1	H	Coenzyme transport and metabolism	predicted protein [Physcomitrella patens]
Gb_40695	35.5936	1902	33.7285	2358	34.6557	2752	12.7775	1359	14.3481	819	12.931	678	1.21102e-12	1.36093	up	--	--	--	--	--	--	--	--	--	--	--	unknown [Picea sitchensis]
Gb_14918	1.82457	249	1.82463	333	1.79047	369	0.785189	219	0.726969	109	0.540851	75	0.000511078	1.36056	up	--	--	--	--	--	[R]	General function prediction only	PPR repeat;; PPR repeat family;; PPR repeat;; Pentatricopeptide repeat domain;; Tetratricopeptide repeat;; DYW family of nucleic acid deaminases;; Tetratricopeptide repeat;; Tetratricopeptide repeat;; Tetratricopeptide repeat;; Tetratricopeptide repeat;; Tetratricopeptide repeat;; Vacuolar sorting protein 39 domain 1;; Tetratricopeptide repeat;; Bacterial type II secretion system chaperone protei…	Pentatricopeptide repeat-containing protein At4g02750 GN=PCMP-H24 OS=Arabidopsis thaliana (Mouse-ear cress) PE=3 SV=1	R	General function prediction only	unknown [Picea sitchensis]
Gb_28365	40.8641	3032	35.6052	3544	35.9643	4014	12.5223	1916	14.5155	1197	15.1977	1158	3.25013e-14	1.36009	up	[P]	Inorganic ion transport and metabolism	Molecular Function: superoxide dismutase activity (GO:0004784);; Biological Process: superoxide metabolic process (GO:0006801);; Cellular Component: plastid nucleoid (GO:0042646);; Molecular Function: metal ion binding (GO:0046872);; Biological Process: oxidation-reduction process (GO:0055114);;	K04564|5.76437e-94|brp:103874199|K04564 superoxide dismutase, Fe-Mn family [EC:1.15.1.1] | (RefSeq) superoxide dismutase [Fe] 3, chloroplastic	Peroxisome (ko04146)	[P]	Inorganic ion transport and metabolism	Iron/manganese superoxide dismutases, C-terminal domain;; Iron/manganese superoxide dismutases, alpha-hairpin domain	Superoxide dismutase [Fe] 3, chloroplastic (Precursor) GN=FSD3 OS=Arabidopsis thaliana (Mouse-ear cress) PE=1 SV=1	P	Inorganic ion transport and metabolism	unknown [Picea sitchensis]
Gb_00338	1.77378	346	1.63549	426	1.93431	570	0.679606	271	0.709276	151	0.643771	126	4.78614e-05	1.35976	up	[RTKL]	General function prediction only;; Signal transduction mechanisms;; Transcription;; Replication, recombination and repair	Molecular Function: transferase activity (GO:0016740);;	--	--	--	--	Protein tyrosine kinase;; Protein kinase domain;; Leucine Rich repeats (2 copies);; Leucine rich repeat;; Leucine Rich Repeat;; Leucine Rich repeat	Putative leucine-rich repeat receptor-like serine/threonine-protein kinase At2g24130 (Precursor) GN=At2g24130 OS=Arabidopsis thaliana (Mouse-ear cress) PE=3 SV=1	T	Signal transduction mechanisms	PREDICTED: putative leucine-rich repeat receptor-like serine/threonine-protein kinase At2g24130-like [Fragaria vesca subsp. vesca]
Gb_36614	2.66417	371	2.49811	465	2.29182	483	1.11106	317	1.18248	180	0.52981	75	0.000150243	1.35842	up	--	--	--	--	--	[R]	General function prediction only	PPR repeat family;; PPR repeat;; Pentatricopeptide repeat domain;; PPR repeat	Pentatricopeptide repeat-containing protein At1g11290 GN=T28P6.20 OS=Arabidopsis thaliana (Mouse-ear cress) PE=2 SV=1	R	General function prediction only	unknown [Picea sitchensis]
Gb_09455	1.63017	241	2.29879	454	2.04165	457	0.930164	282	0.436424	71	0.88617	132	0.000200707	1.35832	up	--	--	--	--	--	[R]	General function prediction only	PPR repeat family;; PPR repeat;; PPR repeat;; Pentatricopeptide repeat domain;; Tetratricopeptide repeat;; Tetratricopeptide repeat;; Tetratricopeptide repeat	Pentatricopeptide repeat-containing protein At2g13600 GN=PCMP-E76 OS=Arabidopsis thaliana (Mouse-ear cress) PE=3 SV=1	R	General function prediction only	PREDICTED: pentatricopeptide repeat-containing protein At2g13600-like [Nelumbo nucifera]
Gb_28390	1.08251	144	1.03014	183	0.92638	186	0.353004	96	0.412575	60	0.396165	53	0.00277902	1.35602	up	--	--	--	--	--	[R]	General function prediction only	PPR repeat family;; PPR repeat;; Pentatricopeptide repeat domain;; PPR repeat;; DYW family of nucleic acid deaminases;; Tetratricopeptide repeat	Pentatricopeptide repeat-containing protein At3g12770 GN=PCMP-H43 OS=Arabidopsis thaliana (Mouse-ear cress) PE=2 SV=1	R	General function prediction only	unknown [Picea sitchensis]
Gb_35390	126.099	19078	129.59	25777	116.795	26226	50.3835	15352	47.9683	7864	43.9045	6585	4.38024e-16	1.35527	up	[O]	Posttranslational modification, protein turnover, chaperones	Molecular Function: copper ion binding (GO:0005507);; Molecular Function: ATP binding (GO:0005524);; Cellular Component: mitochondrial matrix (GO:0005759);; Cellular Component: plasma membrane (GO:0005886);; Biological Process: response to heat (GO:0009408);; Cellular Component: chloroplast (GO:0009507);; Cellular Component: cytosolic ribosome (GO:0022626);; Biological Process: protein refolding …	K04077|0|obr:102709114|K04077 chaperonin GroEL | (RefSeq) chaperonin CPN60-1, mitochondrial	RNA degradation (ko03018)	[O]	Posttranslational modification, protein turnover, chaperones	TCP-1/cpn60 chaperonin family	Chaperonin CPN60-2, mitochondrial (Precursor) GN=CPN60II OS=Zea mays (Maize) PE=2 SV=1	O	Posttranslational modification, protein turnover, chaperones	PREDICTED: chaperonin CPN60-2, mitochondrial-like [Nelumbo nucifera]
Gb_13361	42.0787	3578	36.9704	4202	31.8321	4093	13.7962	2401	14.8228	1377	13.8383	1183	2.04121e-08	1.35513	up	--	--	Biological Process: intracellular transport (GO:0046907);;	K15306|6.30942e-78|vvi:100257001|K15306 Ran-binding protein 1 | (RefSeq) ran-binding protein 1 homolog b	--	[U]	Intracellular trafficking, secretion, and vesicular transport	RanBP1 domain	Ran-binding protein 1 homolog c GN=MZN1.4 OS=Arabidopsis thaliana (Mouse-ear cress) PE=2 SV=1	U	Intracellular trafficking, secretion, and vesicular transport	unknown [Picea sitchensis]
Gb_09839	11.8037	1356	13.2397	2154	13.7956	2501	4.18543	966	5.36373	706	5.39573	652	5.078e-13	1.35461	up	[RTKL]	General function prediction only;; Signal transduction mechanisms;; Transcription;; Replication, recombination and repair	Biological Process: activation of MAPKK activity (GO:0000186);; Molecular Function: MAP kinase kinase kinase activity (GO:0004709);; Molecular Function: protein tyrosine kinase activity (GO:0004713);; Molecular Function: ATP binding (GO:0005524);; Biological Process: vegetative to reproductive phase transition of meristem (GO:0010228);; Biological Process: glucuronoxylan metabolic process (GO:001…	--	--	[T]	Signal transduction mechanisms	Protein kinase domain;; Protein tyrosine kinase	Serine/threonine-protein kinase PBS1 GN=PBS1 OS=Arabidopsis thaliana (Mouse-ear cress) PE=1 SV=1	T	Signal transduction mechanisms	PREDICTED: serine/threonine-protein kinase PBS1 [Vitis vinifera]
Gb_16895	5.02945	668	4.39479	780	4.6767	939	1.84737	502	1.85465	269	1.68523	225	8.09088e-07	1.35441	up	--	--	--	--	--	[R]	General function prediction only	PPR repeat family;; PPR repeat;; PPR repeat;; Pentatricopeptide repeat domain;; DYW family of nucleic acid deaminases;; Tetratricopeptide repeat;; Tetratricopeptide repeat;; Tetratricopeptide repeat;; Region in Clathrin and VPS;; Mitochondrial ATPase expression	Pentatricopeptide repeat-containing protein At1g11290 GN=T28P6.20 OS=Arabidopsis thaliana (Mouse-ear cress) PE=2 SV=1	R	General function prediction only	unknown [Picea sitchensis]
Gb_16772	1.85473	174	2.18723	309	2.78079	434	0.941309	200	0.843329	91	0.820588	82	0.000362723	1.35309	up	--	--	Molecular Function: protein binding (GO:0005515);; Cellular Component: nucleolus (GO:0005730);; Cellular Component: Cul4-RING E3 ubiquitin ligase complex (GO:0080008);;	K14830|8.82217e-26|sly:101260394|K14830 protein MAK11 | (RefSeq) p21-activated protein kinase-interacting protein 1-like	--	[S]	Function unknown	WD domain, G-beta repeat	--	R	General function prediction only	PREDICTED: p21-activated protein kinase-interacting protein 1-like [Solanum lycopersicum]
Gb_08834	2.69242	386	2.16401	414	2.24269	486	1.10133	323	0.657336	103	0.948685	137	0.000198726	1.35296	up	--	--	--	--	--	[R]	General function prediction only	PPR repeat family;; PPR repeat;; PPR repeat;; Pentatricopeptide repeat domain	Pentatricopeptide repeat-containing protein At4g21300 GN=PCMP-E36 OS=Arabidopsis thaliana (Mouse-ear cress) PE=3 SV=1	R	General function prediction only	unknown [Picea sitchensis]
Gb_18149	2.83785	320	2.52121	380	2.90335	495	1.08756	251	1.15836	143	0.906798	103	0.000126462	1.35216	up	--	--	--	--	--	[R]	General function prediction only	PPR repeat family;; PPR repeat;; PPR repeat;; Pentatricopeptide repeat domain;; DYW family of nucleic acid deaminases	Pentatricopeptide repeat-containing protein At3g46790, chloroplastic (Precursor) GN=T6H20.180 OS=Arabidopsis thaliana (Mouse-ear cress) PE=2 SV=1	R	General function prediction only	unknown [Picea sitchensis]
Gb_30147	1.85014	231	1.83919	306	1.8511	349	0.685593	175	0.860039	117	0.573089	72	0.000443283	1.3517	up	--	--	--	--	--	[R]	General function prediction only	PPR repeat;; PPR repeat family;; PPR repeat;; Pentatricopeptide repeat domain;; Tetratricopeptide repeat;; Tetratricopeptide repeat;; Tetratricopeptide repeat	Pentatricopeptide repeat-containing protein At3g12770 GN=PCMP-H43 OS=Arabidopsis thaliana (Mouse-ear cress) PE=2 SV=1	R	General function prediction only	unknown [Picea sitchensis]
Gb_27873	97.3352	10665	86.3407	12646	85.9105	14236	35.7753	8025	34.801	4166	32.6283	3595	1.28577e-15	1.35152	up	--	--	--	--	--	[R]	General function prediction only	Pentatricopeptide repeat domain;; PPR repeat;; PPR repeat family;; Tetratricopeptide repeat;; PPR repeat;; Tetratricopeptide repeat	Pentatricopeptide repeat-containing protein At1g80270, mitochondrial (Precursor) GN=At1g80270 OS=Arabidopsis thaliana (Mouse-ear cress) PE=2 SV=1	R	General function prediction only	unknown [Picea sitchensis]
Gb_06009	49.8504	2899	41.7122	3243	39.4121	3466	15.7101	1871	19.0288	1209	15.5355	909	4.08872e-09	1.35145	up	--	--	Biological Process: lipid biosynthetic process (GO:0008610);; Biological Process: cellular biosynthetic process (GO:0044249);;	--	--	--	--	--	--	S	Function unknown	unknown [Picea sitchensis]
Gb_15679	70.3497	6001	63.1324	7199	58.877	7595	24.0518	4200	25.5996	2386	24.2376	2079	8.0454e-15	1.34897	up	--	--	Cellular Component: mitochondrial outer membrane (GO:0005741);; Molecular Function: voltage-gated anion channel activity (GO:0008308);; Biological Process: regulation of anion transport (GO:0044070);; Biological Process: transmembrane transport (GO:0055085);;	K15040|1.21699e-138|cmo:103487026|K15040 voltage-dependent anion channel protein 2 | (RefSeq) mitochondrial outer membrane protein porin of 34 kDa	--	[P]	Inorganic ion transport and metabolism	Eukaryotic porin	Mitochondrial outer membrane protein porin of 36 kDa OS=Solanum tuberosum (Potato) PE=1 SV=2	P	Inorganic ion transport and metabolism	unknown [Picea sitchensis]
Gb_26340	1.47932	133	1.27679	154	1.40105	191	0.630082	116	0.647273	64	0.300753	28	0.00657191	1.34825	up	--	--	--	--	--	[R]	General function prediction only	PPR repeat family;; PPR repeat;; Pentatricopeptide repeat domain;; PPR repeat;; Tetratricopeptide repeat	Pentatricopeptide repeat-containing protein At3g12770 GN=PCMP-H43 OS=Arabidopsis thaliana (Mouse-ear cress) PE=2 SV=1	R	General function prediction only	unknown [Picea sitchensis]
Gb_17581	6.29093	1762	6.21226	2267	5.78758	2412	2.51084	1358	2.58567	784	2.2079	560	1.3767e-11	1.34809	up	[L]	Replication, recombination and repair	--	--	--	[L]	Replication, recombination and repair	DNA polymerase III, delta subunit;; DNA polymerase III subunits gamma and tau domain III;; ATPase family associated with various cellular activities (AAA);; DNA polymerase III, delta subunit;; Holliday junction DNA helicase ruvB N-terminus	Protein STICHEL-like 3 GN=At4g18820 OS=Arabidopsis thaliana (Mouse-ear cress) PE=3 SV=1	L	Replication, recombination and repair	PREDICTED: protein STICHEL-like 3 isoform X1 [Vitis vinifera]
Gb_25667	19.4486	1308	15.2158	1368	17.0345	1733	7.24111	997	6.30579	464	6.28232	425	2.16467e-09	1.34754	up	[S]	Function unknown	--	K19761|2.82682e-59|mdm:103440030|K19761 gamma-glutamylaminecyclotransferase [EC:2.3.2.-] | (RefSeq) putative gamma-glutamylcyclotransferase At3g02910	--	[S]	Function unknown	AIG2-like family	Putative gamma-glutamylcyclotransferase At3g02910 GN=At3g02910 OS=Arabidopsis thaliana (Mouse-ear cress) PE=2 SV=2	S	Function unknown	unknown [Picea sitchensis]
Gb_12004	1.5958	207	1.4159	246	1.36485	268	0.581512	155	0.472606	67	0.626488	82	0.0013647	1.34581	up	--	--	--	--	--	[R]	General function prediction only	PPR repeat;; PPR repeat family;; PPR repeat;; Pentatricopeptide repeat domain;; DYW family of nucleic acid deaminases;; Tetratricopeptide repeat	Pentatricopeptide repeat-containing protein At1g11290 GN=T28P6.20 OS=Arabidopsis thaliana (Mouse-ear cress) PE=2 SV=1	R	General function prediction only	unknown [Picea sitchensis]
NG_16912	2.61979	157	3.16495	254	3.37289	302	1.42794	175	1.02711	66	0.999841	63	0.00172607	1.34576	up	[G]	Carbohydrate transport and metabolism	Cellular Component: extracellular region (GO:0005576);; Molecular Function: cellulase activity (GO:0008810);; Biological Process: cellulose catabolic process (GO:0030245);; Biological Process: cell wall organization (GO:0071555);;	--	--	--	--	Glycosyl hydrolase family 9	Endoglucanase 17 OS=Arabidopsis thaliana OX=3702 GN=At4g02290 PE=2 SV=1	G	Carbohydrate transport and metabolism	endoglucanase 17-like [Olea europaea var. sylvestris]
Gb_31696	2.05311	351	1.99268	455	1.94355	502	0.902516	315	0.666843	125	0.729036	125	0.000148656	1.34383	up	--	--	--	--	--	[R]	General function prediction only	PPR repeat family;; PPR repeat;; PPR repeat;; Pentatricopeptide repeat domain;; DYW family of nucleic acid deaminases;; Tetratricopeptide repeat;; Tetratricopeptide repeat	Pentatricopeptide repeat-containing protein At3g57430, chloroplastic (Precursor) GN=PCMP-H81 OS=Arabidopsis thaliana (Mouse-ear cress) PE=2 SV=2	R	General function prediction only	PREDICTED: pentatricopeptide repeat-containing protein At4g21065-like [Nelumbo nucifera]
Gb_27491	1.1555	177	0.963494	197	1.17814	272	0.376541	118	0.491017	82	0.39909	62	0.0012761	1.34371	up	--	--	Cellular Component: mitochondrion (GO:0005739);;	--	--	[R]	General function prediction only	PPR repeat family;; PPR repeat;; PPR repeat;; Pentatricopeptide repeat domain;; DYW family of nucleic acid deaminases;; Tetratricopeptide repeat;; Tetratricopeptide repeat	Pentatricopeptide repeat-containing protein At4g02750 GN=PCMP-H24 OS=Arabidopsis thaliana (Mouse-ear cress) PE=3 SV=1	R	General function prediction only	PREDICTED: pentatricopeptide repeat-containing protein At4g02750-like isoform X1 [Nelumbo nucifera]
Gb_37554	1.86717	271	1.67065	325	1.73171	381	0.670417	200	0.7615	121	0.595359	87	0.000356556	1.34326	up	--	--	--	--	--	[R]	General function prediction only	PPR repeat family;; PPR repeat;; Pentatricopeptide repeat domain;; PPR repeat;; DYW family of nucleic acid deaminases	Pentatricopeptide repeat-containing protein DOT4, chloroplastic {ECO:0000305} (Precursor) GN=At4g18750 OS=Arabidopsis thaliana (Mouse-ear cress) PE=2 SV=1	R	General function prediction only	unknown [Picea sitchensis]
Gb_41258	415.685	7029	356.087	8050	312.581	7994	121.805	4217	153.71	2840	144.114	2451	5.85081e-08	1.34256	up	[O]	Posttranslational modification, protein turnover, chaperones	Molecular Function: ATP binding (GO:0005524);; Cellular Component: cytoplasm (GO:0005737);; Biological Process: protein folding (GO:0006457);;	K04078|6.86701e-51|mus:103995368|K04078 chaperonin GroES | (RefSeq) 10 kDa chaperonin-like	--	[O]	Posttranslational modification, protein turnover, chaperones	Chaperonin 10 Kd subunit	10 kDa chaperonin GN=CPN10 OS=Arabidopsis thaliana (Mouse-ear cress) PE=3 SV=1	O	Posttranslational modification, protein turnover, chaperones	unknown [Picea sitchensis]
Gb_17074	6.13752	496	7.14573	772	5.20329	636	2.61473	433	2.39823	212	2.09036	170	1.08527e-05	1.34203	up	--	--	Molecular Function: transcription factor activity, sequence-specific DNA binding (GO:0003700);; Biological Process: regulation of transcription, DNA-templated (GO:0006355);; Molecular Function: sequence-specific DNA binding (GO:0043565);;	--	--	--	--	WRKY DNA -binding domain	Probable WRKY transcription factor 49 GN=WRKY49 OS=Arabidopsis thaliana (Mouse-ear cress) PE=2 SV=1	K	Transcription	hypothetical protein AMTR_s00012p00243090 [Amborella trichopoda]
Gb_02060	1.88054	238	1.40818	239	1.60821	308	0.729831	189	0.599489	83	0.558013	71	0.00156556	1.34132	up	--	--	--	--	--	[R]	General function prediction only	PPR repeat family;; PPR repeat;; PPR repeat;; Pentatricopeptide repeat domain;; DYW family of nucleic acid deaminases;; Tetratricopeptide repeat;; Tetratricopeptide repeat;; Tetratricopeptide repeat;; Vacuolar sorting protein 39 domain 1	Pentatricopeptide repeat-containing protein At1g11290 GN=T28P6.20 OS=Arabidopsis thaliana (Mouse-ear cress) PE=2 SV=1	R	General function prediction only	unknown [Picea sitchensis]
Gb_35366	1.8989	171	2.25522	271	2.49827	339	0.556438	103	1.15773	114	0.852392	77	0.000235234	1.33994	up	--	--	--	--	--	--	--	EamA-like transporter family	WAT1-related protein At5g07050 GN=At5g07050 OS=Arabidopsis thaliana (Mouse-ear cress) PE=2 SV=1	S	Function unknown	unknown [Picea sitchensis]
Gb_21057	1.02463	140	1.24188	226	1.009	208	0.434703	121	0.464199	69	0.360058	50	0.00267304	1.33994	up	--	--	--	--	--	[R]	General function prediction only	PPR repeat;; PPR repeat family;; PPR repeat;; Pentatricopeptide repeat domain;; Tetratricopeptide repeat;; Tetratricopeptide repeat;; Tetratricopeptide repeat;; Tetratricopeptide repeat;; Region in Clathrin and VPS;; BALF1 protein;; ChAPs (Chs5p-Arf1p-binding proteins)	Pentatricopeptide repeat-containing protein DOT4, chloroplastic {ECO:0000305} (Precursor) GN=At4g18750 OS=Arabidopsis thaliana (Mouse-ear cress) PE=2 SV=1	S	Function unknown	PREDICTED: pentatricopeptide repeat-containing protein At4g18750, chloroplastic [Nelumbo nucifera]
Gb_23842	25.7312	880	19.3472	884	18.0634	934	10.3689	726	8.16201	305	5.76531	199	0.0013199	1.33957	up	--	--	--	--	--	--	--	Dirigent-like protein	Disease resistance response protein 206 (Precursor) GN=PI206 OS=Pisum sativum (Garden pea) PE=2 SV=2	R	General function prediction only	dirigent protein [Thuja plicata]
Gb_02122	51.3315	4968	43.5641	5637	42.3485	6198	17.804	3533	17.423	1843	17.7667	1733	8.31768e-12	1.33934	up	--	--	--	--	--	[D]	Cell cycle control, cell division, chromosome partitioning	Cyclin, N-terminal domain;; Cyclin, C-terminal domain	Cyclin-D3-1 GN=P0644A02.8 OS=Oryza sativa subsp. japonica (Rice) PE=2 SV=2	D	Cell cycle control, cell division, chromosome partitioning	unknown [Picea sitchensis]
Gb_24417	35.6653	2061	25.755	1988	24.7822	2164	11.8814	1405	10.7634	680	10.729	623	0.000323402	1.33862	up	[K]	Transcription	--	--	--	--	--	Double-stranded RNA binding motif	Double-stranded RNA-binding protein 1 GN=F21M12.9 OS=Arabidopsis thaliana (Mouse-ear cress) PE=1 SV=1	R	General function prediction only	Double-stranded RNA-binding 1 -like protein [Gossypium arboreum]
NG_21957	2.04021	146	2.70494	258	2.80539	303	1.13881	167	0.597973	47	1.14948	83	0.00149385	1.33728	up	--	--	--	--	--	--	--	Plant protein of unknown function	Putative UPF0481 protein At3g02645 OS=Arabidopsis thaliana OX=3702 GN=At3g02645 PE=3 SV=1	S	Function unknown	putative UPF0481 protein At3g02645 [Chenopodium quinoa]
Gb_31854	7.39331	423	8.30239	635	11.7079	1013	2.16191	254	4.1783	261	4.26274	246	2.1038e-05	1.33653	up	[F]	Nucleotide transport and metabolism	Molecular Function: adenine phosphoribosyltransferase activity (GO:0003999);; Cellular Component: cytoplasm (GO:0005737);; Biological Process: adenine salvage (GO:0006168);; Biological Process: nucleoside metabolic process (GO:0009116);;	K00759|5.07986e-102|tcc:TCM_016011|K00759 adenine phosphoribosyltransferase [EC:2.4.2.7] | (RefSeq) Adenine phosphoribosyl transferase 4	Purine metabolism (ko00230)	[F]	Nucleotide transport and metabolism	Phosphoribosyl transferase domain	Adenine phosphoribosyltransferase 3 GN=APT3 OS=Arabidopsis thaliana (Mouse-ear cress) PE=1 SV=1	F	Nucleotide transport and metabolism	unknown [Picea sitchensis]
NG_21138	1.03136	94	1.58488	194	0.978331	135	0.44803	84	0.460893	46	0.469996	44	0.00524464	1.33639	up	[O]	Posttranslational modification, protein turnover, chaperones	--	--	--	[O]	Posttranslational modification, protein turnover, chaperones	Hsp20/alpha crystallin family	15.4 kDa class V heat shock protein OS=Arabidopsis thaliana OX=3702 GN=HSP15.4 PE=2 SV=1	O	Posttranslational modification, protein turnover, chaperones	FK506-binding protein 5 [Amborella trichopoda]
Gb_04144	1.91783	215	1.8141	272	1.66935	283	0.789779	182	0.621496	77	0.659155	75	0.0015427	1.33586	up	--	--	--	--	--	[R]	General function prediction only	PPR repeat family;; PPR repeat;; Pentatricopeptide repeat domain;; PPR repeat;; DYW family of nucleic acid deaminases;; Tetratricopeptide repeat;; Tetratricopeptide repeat	Pentatricopeptide repeat-containing protein At3g24000, mitochondrial (Precursor) GN=PCMP-H87 OS=Arabidopsis thaliana (Mouse-ear cress) PE=3 SV=1	R	General function prediction only	unknown [Picea sitchensis]
Gb_36142	4.00057	540	3.75192	676	4.01037	818	1.36427	377	1.60398	237	1.58349	215	1.97402e-06	1.33573	up	--	--	--	--	--	[R]	General function prediction only	PPR repeat;; PPR repeat family;; PPR repeat;; Pentatricopeptide repeat domain;; Tetratricopeptide repeat;; Tetratricopeptide repeat;; Tetratricopeptide repeat	Pentatricopeptide repeat-containing protein At2g13600 GN=PCMP-E76 OS=Arabidopsis thaliana (Mouse-ear cress) PE=3 SV=1	R	General function prediction only	pentatricopeptide repeat protein 91 [Funaria hygrometrica]
Gb_19333	7.58338	525	7.91597	726	7.43832	776	2.90672	412	2.73965	207	3.19214	223	3.25742e-06	1.33445	up	[KAD]	Transcription;; RNA processing and modification;; Cell cycle control, cell division, chromosome partitioning	Molecular Function: DNA binding (GO:0003677);; Molecular Function: chromatin binding (GO:0003682);;	K09422|6.97826e-68|fve:101312499|K09422 myb proto-oncogene protein, plant | (RefSeq) myb-related protein 308	--	[K]	Transcription	Myb-like DNA-binding domain;; Myb-like DNA-binding domain	Transcription repressor MYB4 GN=MYB4 OS=Arabidopsis thaliana (Mouse-ear cress) PE=1 SV=1	K	Transcription	PREDICTED: myb-related protein 308-like [Fragaria vesca subsp. vesca]
Gb_34969	1.40412	225	1.30204	279	0.818801	198	0.449717	148	0.451469	79	0.467307	76	0.00234745	1.33136	up	--	--	--	--	--	[R]	General function prediction only	PPR repeat family;; PPR repeat;; PPR repeat;; Pentatricopeptide repeat domain	Putative pentatricopeptide repeat-containing protein At5g09950 GN=PCMP-H35 OS=Arabidopsis thaliana (Mouse-ear cress) PE=3 SV=1	R	General function prediction only	pentatricopeptide repeat protein [Physcomitrella patens]
Gb_06311	22.9128	2215	23.8567	3089	24.7548	3626	8.94376	1769	9.76071	1037	8.99731	877	4.43047e-13	1.3311	up	--	--	--	--	--	--	--	Protein of unknown function (DUF2786)	--	--	--	predicted protein [Thalassiosira pseudonana CCMP1335]
Gb_25850	0.820519	73	0.528585	65	0.806111	109	0.004391	1	0.322049	29	0.489626	50	0.010813	1.33102	up	--	--	--	--	--	--	--	--	--	--	--	--
Gb_38680	3.10319	365	3.20356	504	3.685	655	1.32327	319	1.15546	149	1.38488	164	2.91314e-05	1.3305	up	--	--	--	--	--	[R]	General function prediction only	PPR repeat family;; PPR repeat;; Pentatricopeptide repeat domain;; PPR repeat;; DYW family of nucleic acid deaminases	Putative pentatricopeptide repeat-containing protein At3g13770, mitochondrial (Precursor) GN=PCMP-H85 OS=Arabidopsis thaliana (Mouse-ear cress) PE=3 SV=1	R	General function prediction only	pentatricopeptide repeat protein 78 [Funaria hygrometrica]
Gb_25046	5.50171	650	4.99907	789	4.51015	805	1.88429	456	1.9618	253	1.99183	237	1.77925e-06	1.33036	up	--	--	--	--	--	[R]	General function prediction only	PPR repeat family;; PPR repeat;; PPR repeat;; Pentatricopeptide repeat domain;; DYW family of nucleic acid deaminases;; Tetratricopeptide repeat	Putative pentatricopeptide repeat-containing protein At3g13770, mitochondrial (Precursor) GN=PCMP-H85 OS=Arabidopsis thaliana (Mouse-ear cress) PE=3 SV=1	R	General function prediction only	unknown [Picea sitchensis]
Gb_33264	38.5669	2754	29.0627	2782	27.4559	2956	10.1977	1483	13.7847	1072	13.2705	961	3.59987e-05	1.32731	up	--	--	Molecular Function: transcription regulatory region sequence-specific DNA binding (GO:0000976);; Molecular Function: transcription factor activity, sequence-specific DNA binding (GO:0003700);; Cellular Component: nucleus (GO:0005634);; Biological Process: regulation of transcription, DNA-templated (GO:0006355);;	K09338|3.46686e-40|ppp:PHYPADRAFT_123042|K09338 homeobox-leucine zipper protein | (RefSeq) hypothetical protein	--	[K]	Transcription	Homeobox domain;; HD-ZIP protein N terminus;; Homeobox associated leucine zipper	Homeobox-leucine zipper protein HOX19 OS=Oryza sativa subsp. japonica (Rice) PE=2 SV=1	K	Transcription	predicted protein [Physcomitrella patens]
Gb_05354	1.00584	145	0.740352	143	1.18543	258	0.423821	125	0.432835	68	0.281472	41	0.00404578	1.325	up	--	--	--	--	--	[R]	General function prediction only	PPR repeat family;; PPR repeat;; PPR repeat;; Pentatricopeptide repeat domain;; DYW family of nucleic acid deaminases	Pentatricopeptide repeat-containing protein At2g27610 OS=Arabidopsis thaliana (Mouse-ear cress) PE=2 SV=1	S	Function unknown	PREDICTED: pentatricopeptide repeat-containing protein At2g27610 [Nelumbo nucifera]
Gb_41329	9.39498	1422	7.84737	1598	7.45766	1703	3.36967	1039	3.18486	531	3.07319	471	5.5285e-09	1.32455	up	[RTKL]	General function prediction only;; Signal transduction mechanisms;; Transcription;; Replication, recombination and repair	Molecular Function: protein serine/threonine kinase activity (GO:0004674);; Molecular Function: ATP binding (GO:0005524);; Biological Process: protein phosphorylation (GO:0006468);;	--	--	[T]	Signal transduction mechanisms	Protein kinase domain;; Protein tyrosine kinase;; Universal stress protein family	Probable receptor-like serine/threonine-protein kinase At5g57670 GN=At5g57670 OS=Arabidopsis thaliana (Mouse-ear cress) PE=2 SV=1	T	Signal transduction mechanisms	PREDICTED: probable receptor-like serine/threonine-protein kinase At5g57670 isoform X1 [Elaeis guineensis]
Gb_04891	33.8513	1126	32.6081	1456	28.4858	1499	13.1973	935	12.7145	504	11.3267	333	9.33775e-09	1.32376	up	--	--	--	--	--	--	--	--	--	--	--	unknown [Picea sitchensis]
NG_9244	1.86391	79	3.44497	194	2.70274	172	0.759995	66	1.02808	48	1.3078	56	0.0022821	1.32356	up	--	--	--	--	--	--	--	--	--	--	--	--
Gb_39530	2.09978	183	2.40168	280	2.09314	276	0.863583	155	0.72927	70	0.96115	85	0.00119405	1.32292	up	--	--	--	--	--	--	--	--	--	--	--	--
Gb_09547	12.4148	1207	9.09907	1245	10.4205	1547	3.76885	801	3.9308	436	4.56123	451	5.48366e-09	1.32196	up	--	--	--	--	--	--	--	--	--	--	--	--
Gb_24120	2.74666	141	2.06206	141	1.95862	152	0.86234	91	0.837261	47	0.943295	49	0.00728346	1.32129	up	--	--	Cellular Component: cytoplasmic vesicle (GO:0016023);;	--	--	--	--	50S ribosome-binding GTPase	--	S	Function unknown	hypothetical protein AMTR_s00058p00182990 [Amborella trichopoda]
Gb_35634	2.40881	110	1.92953	118	2.09831	145	0.622998	58	1.01953	51	0.884546	41	0.00563131	1.32	up	--	--	--	--	--	[R]	General function prediction only	--	Pentatricopeptide repeat-containing protein At1g20230 GN=PCMP-H21 OS=Arabidopsis thaliana (Mouse-ear cress) PE=2 SV=2	S	Function unknown	hypothetical protein 2_9455_01, partial [Pinus taeda]
Gb_40472	2.90752	410	2.52525	476	2.54826	544	1.18007	341	0.97402	151	0.953696	136	0.000118419	1.31934	up	--	--	--	--	--	[R]	General function prediction only	PPR repeat family;; PPR repeat;; PPR repeat;; Pentatricopeptide repeat domain;; DYW family of nucleic acid deaminases;; Tetratricopeptide repeat;; Tetratricopeptide repeat;; Region in Clathrin and VPS;; Bacterial transcriptional activator domain	Pentatricopeptide repeat-containing protein At1g11290 GN=T28P6.20 OS=Arabidopsis thaliana (Mouse-ear cress) PE=2 SV=1	R	General function prediction only	unknown [Picea sitchensis]
Gb_01298	0.663961	54	1.19192	132	0.957313	120	0.25583	44	0.192973	13	0.697339	58	0.0152309	1.31919	up	--	--	Cellular Component: nucleosome (GO:0000786);; Molecular Function: DNA binding (GO:0003677);; Cellular Component: nucleus (GO:0005634);; Biological Process: nucleosome assembly (GO:0006334);; Cellular Component: chloroplast (GO:0009507);; Molecular Function: protein heterodimerization activity (GO:0046982);;	K11252|8.36162e-42|brp:103864913|K11252 histone H2B | (RefSeq) histone H2B.3-like	--	[B]	Chromatin structure and dynamics	Core histone H2A/H2B/H3/H4	Histone H2B.1 GN=At1g07790 OS=Arabidopsis thaliana (Mouse-ear cress) PE=1 SV=3	B	Chromatin structure and dynamics	BnaC03g26430D [Brassica napus]
Gb_22143	2.69539	137	3.65839	258	2.727	214	1.41048	150	1.10205	64	1.116	52	0.00362895	1.31878	up	--	--	Cellular Component: intracellular (GO:0005622);;	--	--	--	--	SnoaL-like domain	--	R	General function prediction only	hypothetical protein VITISV_035107 [Vitis vinifera]
NG_18147	0.880445	113	0.979822	184	1.07506	209	0.283704	77	0.448164	69	0.409599	52	0.00195052	1.31877	up	[VI]	Defense mechanisms;; Lipid transport and metabolism	Molecular Function: glutathione peroxidase activity (GO:0004602);; Biological Process: response to oxidative stress (GO:0006979);; Biological Process: oxidation-reduction process (GO:0055114);; Biological Process: cellular oxidant detoxification (GO:0098869);;	K00432|9.13814e-13|bdi:100829599|K00432 glutathione peroxidase [EC:1.11.1.9] | (RefSeq) probable phospholipid hydroperoxide glutathione peroxidase	Glutathione metabolism (ko00480);; Arachidonic acid metabolism (ko00590)	[O]	Posttranslational modification, protein turnover, chaperones	--	Probable phospholipid hydroperoxide glutathione peroxidase OS=Nicotiana tabacum OX=4097 PE=2 SV=1	O	Posttranslational modification, protein turnover, chaperones	glutathione peroxidase-like protein, partial [Triticum aestivum]
Gb_23328	28.4962	5017	30.059	7075	29.6862	7904	11.2907	4070	11.5842	2229	11.6486	2063	1.18163e-14	1.31851	up	--	--	Molecular Function: binding (GO:0005488);; Biological Process: transcription, DNA-templated (GO:0006351);; Biological Process: response to hormone (GO:0009725);; Biological Process: flower development (GO:0009908);; Biological Process: animal organ development (GO:0048513);; Biological Process: regulation of cellular process (GO:0050794);;	--	--	--	--	Auxin response factor;; AUX/IAA family;; B3 DNA binding domain	Auxin response factor 2 GN=MTG10.3 OS=Arabidopsis thaliana (Mouse-ear cress) PE=1 SV=2	K	Transcription	PREDICTED: auxin response factor 2-like isoform X2 [Nelumbo nucifera]
Gb_38232	3.72612	539	3.53442	683	3.68796	806	1.82456	540	0.122092	20	2.32613	338	0.0084536	1.31822	up	--	--	--	--	--	[R]	General function prediction only	PPR repeat family;; PPR repeat;; PPR repeat;; Pentatricopeptide repeat domain;; DYW family of nucleic acid deaminases	Pentatricopeptide repeat-containing protein At4g13650 GN=PCMP-H42 OS=Arabidopsis thaliana (Mouse-ear cress) PE=2 SV=2	R	General function prediction only	PREDICTED: putative pentatricopeptide repeat-containing protein At5g13230, mitochondrial isoform X1 [Nelumbo nucifera]
Gb_24464	4.15327	501	5.2389	839	5.83047	1059	1.90531	471	2.02563	267	1.98207	241	4.90284e-07	1.31756	up	--	--	--	--	--	--	--	Auxin canalisation;; Plant pleckstrin homology-like region	--	S	Function unknown	PREDICTED: mucin-19-like [Glycine max]
Gb_17092	2.41309	313	2.36098	409	2.62203	514	0.483234	129	1.38714	197	1.03768	136	1.45938e-05	1.31745	up	--	--	--	--	--	[R]	General function prediction only	PPR repeat family;; PPR repeat;; PPR repeat;; Pentatricopeptide repeat domain;; DYW family of nucleic acid deaminases	Pentatricopeptide repeat-containing protein At3g12770 GN=PCMP-H43 OS=Arabidopsis thaliana (Mouse-ear cress) PE=2 SV=1	R	General function prediction only	unknown [Picea sitchensis]
Gb_39420	1.4352	253	1.35314	319	1.1147	297	0.485279	175	0.509282	98	0.541566	96	0.00072124	1.31636	up	--	--	--	K01514|4.05151e-76|pmum:103325328|K01514 exopolyphosphatase [EC:3.6.1.11] | (RefSeq) protein prune homolog	Purine metabolism (ko00230)	[C]	Energy production and conversion	--	--	C	Energy production and conversion	PREDICTED: protein prune homolog [Prunus mume]
Gb_33411	5.51699	891	5.23121	1130	5.42782	1326	2.21244	731	2.05392	363	2.07687	337	5.08563e-08	1.31545	up	--	--	--	--	--	[R]	General function prediction only	PPR repeat family;; PPR repeat;; PPR repeat;; Pentatricopeptide repeat domain;; DYW family of nucleic acid deaminases;; Tetratricopeptide repeat;; Tetratricopeptide repeat;; Tetratricopeptide repeat	Pentatricopeptide repeat-containing protein At2g27610 OS=Arabidopsis thaliana (Mouse-ear cress) PE=2 SV=1	R	General function prediction only	hypothetical protein L484_022634 [Morus notabilis]
Gb_15004	129.429	15015	79.3196	12301	99.1017	17387	45.3355	10767	38.4447	4873	37.3065	4352	0.00230213	1.31424	up	[K]	Transcription	Molecular Function: DNA binding (GO:0003677);; Biological Process: regulation of transcription, DNA-templated (GO:0006355);; Molecular Function: zinc ion binding (GO:0008270);;	K18754|2.9913e-32|smo:SELMODRAFT_187582|K18754 protein lin-28 | (RefSeq) hypothetical protein	--	[J]	Translation, ribosomal structure and biogenesis	'Cold-shock' DNA-binding domain;; Zinc knuckle;; Ribonuclease B OB domain	Glycine-rich protein 2 GN=GRP-2 OS=Nicotiana sylvestris (Wood tobacco) PE=2 SV=1	J	Translation, ribosomal structure and biogenesis	hypothetical protein SELMODRAFT_187582 [Selaginella moellendorffii]
Gb_36068	154.148	18466	162.696	26061	154.362	27975	66.2009	16244	60.2588	7908	58.2346	7006	2.66305e-15	1.31348	up	[O]	Posttranslational modification, protein turnover, chaperones	Molecular Function: ATP binding (GO:0005524);; Biological Process: protein folding (GO:0006457);; Molecular Function: unfolded protein binding (GO:0051082);;	K03283|0|vvi:100250929|K03283 heat shock 70kDa protein 1/8 | (RefSeq) heat shock 70 kDa protein, mitochondrial	--	[O]	Posttranslational modification, protein turnover, chaperones	Hsp70 protein	Heat shock 70 kDa protein, mitochondrial (Precursor) OS=Phaseolus vulgaris (Kidney bean) PE=1 SV=1	O	Posttranslational modification, protein turnover, chaperones	PREDICTED: heat shock 70 kDa protein, mitochondrial [Vitis vinifera]
Gb_16659	11.5302	233	8.95471	242	5.57197	171	3.69234	153	3.21928	72	3.33079	68	0.0296896	1.3133	up	--	--	--	--	--	--	--	--	--	--	--	--
Gb_19265	15.4607	1636	13.6521	1931	13.1667	2104	5.24458	1136	5.7108	661	5.70125	606	8.27702e-11	1.31265	up	[LKJ]	Replication, recombination and repair;; Transcription;; Translation, ribosomal structure and biogenesis	Molecular Function: RNA binding (GO:0003723);; Molecular Function: ATP-dependent RNA helicase activity (GO:0004004);; Molecular Function: ATP binding (GO:0005524);; Biological Process: rRNA processing (GO:0006364);; Biological Process: tRNA metabolic process (GO:0006399);; Biological Process: phosphatidylglycerol biosynthetic process (GO:0006655);; Biological Process: cellular defense response (G…	K13179|2.23031e-140|sita:101755144|K13179 ATP-dependent RNA helicase DDX18/HAS1 [EC:3.6.4.13] | (RefSeq) DEAD-box ATP-dependent RNA helicase 50	--	[A]	RNA processing and modification	DEAD/DEAH box helicase;; Type III restriction enzyme, res subunit;; SNF2 family N-terminal domain;; Helicase conserved C-terminal domain	DEAD-box ATP-dependent RNA helicase 50 OS=Oryza sativa subsp. japonica (Rice) PE=2 SV=2	A	RNA processing and modification	PREDICTED: DEAD-box ATP-dependent RNA helicase 50-like isoform X1 [Setaria italica]
Gb_09087	66.8313	4045	62.8815	5181	62.9599	5898	25.3063	3143	25.6033	1772	23.5946	1502	1.10592e-13	1.31176	up	[MG]	Cell wall/membrane/envelope biogenesis;; Carbohydrate transport and metabolism	Molecular Function: catalytic activity (GO:0003824);;	K13082|6.84729e-82|tcc:TCM_034078|K13082 bifunctional dihydroflavonol 4-reductase/flavanone 4-reductase [EC:1.1.1.219 1.1.1.234] | (RefSeq) Dihydroflavonol-4-reductase	Flavonoid biosynthesis (ko00941)	[V]	Defense mechanisms	NAD dependent epimerase/dehydratase family;; 3-beta hydroxysteroid dehydrogenase/isomerase family;; Male sterility protein;; NADH(P)-binding	Bifunctional dihydroflavonol 4-reductase/flavanone 4-reductase GN=DFR OS=Malus domestica (Apple) PE=1 SV=1	Q	Secondary metabolites biosynthesis, transport and catabolism	unknown [Picea sitchensis]
[truncated: 3,012 more rows]

## Sheet: Table S4.
Table S4. The significantly eriched GO Terms (P-value<0.01) of DEGs.
GO_ID	ontology	GO_term	Items	Background_Items	p_adj	pvalue	Gene_ID
[truncated: 76 more rows]

## Sheet: Table S5.
Table S5. The KEGG pathway analysis of down-regulated and up-regulated DEGs in ANL buds.
	#Kegg_pathway	ko_id	DEG	DEG_all	DEG_percent	Gene	Gene_all	Gene_percent	P-value	Corrected_P-value	Genes
[truncated: 160 more rows]

## Sheet: Table S6.
Table S6. The expression values of genes related to adaxial–abaxial polarity and boundary formation in NL and ANL buds.
[truncated: 33 more rows]
